# Supplementary material for: A comparison of self-reported and device measured sedentary behaviour in adults: a systematic review and meta-analysis
Source: PubMed Central journal article supplement (PMC7055033; doi:10.1186/s12966-020-00938-3), 2020-03-04
Supplement: 12966_2020_938_MOESM15_ESM.pdf [file 12966_2020_938_MOESM15_ESM.pdf]

**Supplemental table 2. Study characteristics**

| First Author, year   | Age range or mean (SD)                             | N analyzed (%)                            |                                         |                                         | Country, Study name                    | Population                                | Self-report measure                     |                            |              |                                              |                              | Device measure          |                |                         |                |           |                             |
|----------------------|----------------------------------------------------|-------------------------------------------|-----------------------------------------|-----------------------------------------|----------------------------------------|-------------------------------------------|-----------------------------------------|----------------------------|--------------|----------------------------------------------|------------------------------|-------------------------|----------------|-------------------------|----------------|-----------|-----------------------------|
|                      |                                                    | Total                                     | Men                                     | Women                                   |                                        |                                           | Name                                    | Multi-item or single       | Measure type | Recall period*                               | Domain or type               | Name                    | Domain or type | Wear time               | Cut-point      | Axis      | Wear location               |
| Abraham, 2009        | Men: 29.1 (7.9), women: 30.2 (9.5)                 | 32                                        | 16 (50%)                                | 16 (50%)                                | Australia, NR                          | Apparently healthy individuals who run    | Bouchard Activity Record (BAR)          | Multi                      | Daily recall | 24-hours                                     | Sitting (category 1 and 2)   | ActiGraph GT1M          | ST             | 24 hours (wakeful time) | < 100 cpm      | Vertical  | Right hip                   |
|                      |                                                    |                                           |                                         |                                         |                                        |                                           |                                         |                            |              |                                              |                              | activPAL Prof.          |                |                         | Sitting/lying  | N/A       | N/A                         |
| Adams, 2015          | 20-65, Seattle: 44.0 (11.0), Baltimore 46.6 (10.7) | 2199, Seattle: 1287, Baltimore: 912       | 51.8%, Seattle: 54.8%, Baltimore: 47.7% | 48.2%, Seattle: 45.2%, Baltimore: 52.3% | USA, NQLS                              | Apparently healthy                        | IPAQ-LF                                 | Single (weekday + weekend) | Quest.       | Last 7 days                                  | Sitting                      | ActiGraph 7164 or 71256 | ST             | 7 days                  | ≤ 100 cpm      | Vertical  | Right hip                   |
| Aguilar-Farias, 2015 | 74.5 (7.6)                                         | 41: 37 activPAL; 40 SB question; 33 MARCA | 14                                      | 27                                      | Australia, The Time of Your Life study | Community-dwelling older adults           | Sitting question (weekday, weekend day) | Single                     | Quest.       | Usual weekday, weekend day, yesterday        | Sitting                      | activPAL                | ST             | 7 days                  | NA             | N/A       | Right thigh                 |
|                      |                                                    |                                           |                                         |                                         |                                        |                                           | MARCA                                   | Multi                      |              |                                              | Past 2 days                  |                         |                |                         |                |           |                             |
| Aguilar-Farias, 2017 | 43.8 (15.75)                                       | 217                                       | 93 (43)                                 | 124 (57)                                | Chile, National Health Survey          | General population                        | GPAQ                                    | Single                     | Quest.       | Usual sitting on normal day                  | Sitting                      | ActiGraph GT3X          | ST             | 7 days                  | < 100 cpm      | Vertical  | Right hip                   |
| Aittasalo, 2017      | 42.6 (10.9)                                        | 266                                       | 100%                                    | 64%                                     | Finland, Moving to Business            | Employees from small to medium workplaces | WSQ                                     | Multi                      | Quest.       | Typical working day, typical non-working day | Sitting (work, home, travel) | Hookie AM13             | ST             | 7 days                  | NR             | Tri-axial | Right hip                   |
| Alkahtani, 2016      | 20.0 (1.1)                                         | 62                                        | 62 (100)                                | 0                                       | Saudia Arabia, NR                      | Male university students                  | GPAQ                                    | Single                     | Quest.       | Usual sitting on typical day                 | Sitting                      | ActiGraph GT3X          | ST             | 7 days                  | < 100 cpm (VM) | VM        | Right hip                   |
| Anjana, 2015         | Urban: 44.4 (14.2), rural: 41.7 (13.4)             | 103                                       | NR                                      | NR                                      | India, NR                              | Urban and rural populations               | MPAQ                                    | Multi                      | Quest.       | Typical week                                 | TV, sitting                  | ActiGraph GT3X          | ST             | 7 days                  | < 100 cpm      | VM        | Dominant hip (mostly right) |

| First Author, year   | Age range or mean (SD) | N analyzed (%)           |          |          | Country, Study name        | Population                            | Self-report measure         |                             |              |                                 |                                                  | Device measure |                |           |                          |           |               |
|----------------------|------------------------|--------------------------|----------|----------|----------------------------|---------------------------------------|-----------------------------|-----------------------------|--------------|---------------------------------|--------------------------------------------------|----------------|----------------|-----------|--------------------------|-----------|---------------|
|                      |                        | Total                    | Men      | Women    |                            |                                       | Name                        | Multi-item or single        | Measure type | Recall period*                  | Domain or type                                   | Name           | Domain or type | Wear time | Cut-point                | Axis      | Wear location |
| Barone Gibbs, 2017   | 68 (7)                 | 38                       | 11       | 27       | USA, NR                    | Older adults                          | CHAMPS                      | Multi                       | Quest.       | Unclear                         | TV, computer (work or recreation), riding in car | SenseWear Pro  | ST             | 7 days    | N/A                      | N/A       | Arm           |
| Barwais, 2014        | 27 (4.5)               | 22                       | 14       | 8        | Australia, NR              | Sedentary adults                      | 7-Day SLIPA log             | N/A                         | Log          | 7 day log                       | Sum of SBs                                       | ActiGraph GT3X | ST, sitting    | 7 days    | < 100 cpm & inclinometer | NR        | Right hip     |
| Benitez-Porres, 2013 | 18-75                  | 99                       | 5        | 94       | Spain, Al-Andalus Study    | Fibromyalgia patients                 | IPAQ-LF (sitting questions) | Single (week day & weekend) | Quest.       | Last 7 days                     | Sitting                                          | ActiGraph GT1M | ST             | 9 days    | < 100 cpm                | Vertical  | Lower back    |
| Biddle, 2012         | 32.5 (5.6)             | IPAQ: 131, Marshall: 128 | 36%      | 64%      | NR, Project STAND          | Young adults at risk for diabetes     | IPAQ-SF (sitting only)      | Single                      | Quest.       | Last 7 days                     | Sitting                                          | ActiGraph GT3X | ST             | 10 days   | < 100 cpm                | NR        | Right hip     |
|                      |                        |                          |          |          |                            |                                       | Marshall Quest.             | Multi                       |              |                                 | Not defined                                      |                |                |           |                          |           |               |
| Biswas, 2018         | 66.9 (10.5)            | 30 (with both)           | 13 (43%) | 17 (57%) | Canada, NR                 | Cardiac rehab patients                | SBQ                         | Multi                       | Quest.       | Typical weekday and weekend day | SBs                                              | ActiGraph GT3X | ST             | 7 days    | < 150 cpm                | NR        | Hip           |
| Blanchard, 2010      | 80.4 (5.5), 67-92      | 61                       | 41%      | 59%      | Canada, NR                 | Older adults                          | Diary                       | N/A                         | Diary        | 1 week                          | Driving                                          | CarChip E/X    | Driving time   | 1 week    | N/A                      | N/A       | N/A           |
| Blikman, 2014        | NR                     | 19                       | NR       | NR       | Netherlands, NR            | Patients after total hip Arthroplasty | IPAQ-SF & LF (NR)           | Single                      | Quest.       | Last 7 days                     | Sitting                                          | NR             | ST             | NR        | NR                       | NR        | NR            |
| Bond, 2013           | 46.2 (9.1), 21-65      | 52                       | 14%      | 86%      | USA, NR                    | Bariatric surgery patients            | SBQ                         | Multi                       | Quest.       | Typical weekday and weekend day | SBs                                              | SenseWear Pro2 | ST             | 7 days    | N/A                      | Tri-axial | Arm           |
| Bonn, 2015           | 65.4 (8.7)33-86        | 148                      | 148      | 0        | Sweden, VALidation against | Men who underwent Prostate Specific   | Active-Q                    | Multi                       | Quest.       | Past month                      | SBs                                              | GENEA          | ST             | 7 days    | 1.5 MET                  | VM        | Left wrist    |

| First Author, year    | Age range or mean (SD)                            | N analyzed (%)             |                                    |                                    | Country, Study name                                 | Population                                                                                               | Self-report measure                           |                            |                  |                           |                    | Device measure |                |           |           |          |               |
|-----------------------|---------------------------------------------------|----------------------------|------------------------------------|------------------------------------|-----------------------------------------------------|----------------------------------------------------------------------------------------------------------|-----------------------------------------------|----------------------------|------------------|---------------------------|--------------------|----------------|----------------|-----------|-----------|----------|---------------|
|                       |                                                   | Total                      | Men                                | Women                              |                                                     |                                                                                                          | Name                                          | Multi-item or single       | Measure type     | Recall period*            | Domain or type     | Name           | Domain or type | Wear time | Cut-point | Axis     | Wear location |
|                       |                                                   |                            |                                    |                                    | Accelerometer                                       | Antigen testing                                                                                          |                                               |                            |                  |                           |                    |                |                |           |           |          |               |
| Boyle, 2015           | 27-82                                             | 176                        | 54%                                | 46%                                | Australia, Canada, VALIDation against Accelerometer | Colon cancer survivors                                                                                   | Marshall Domain-Specific Sitting Quest.       | Multi                      | Quest.           | Usual weekday and weekend | SBs                | ActiGraph GT3X | ST             | 7 days    | < 100 cpm | NR       | NR            |
| Bruening, 2016        | 18.72 (0.50)                                      | 41                         | 11 (27%)                           | 30 (73%)                           | USA, SPARC study                                    | College students                                                                                         | develSPARC mEMA                               | N/A                        | mobile-based EMA | 4 days                    | SBs                | ActiGraph GT3X | ST             | 4 days    | < 100 cpm | NR       | NR            |
| Bueno-Antequera, 2017 | 41.6 (9.2)                                        | 90                         | 80%                                | 18 (20%)                           | Spain, The PsychiActive project                     | Outpatients with severe mental illness                                                                   | SBQ                                           | Multi                      | Quest.           | Usual weekday and weekend | SBs                | SenseWear      | ST             | 9 days    | N/A       | Bi-axial | Left arm      |
| Busschaert, 2015      | Adults: 47.73 (10.51), older adults: 72.16 (4.35) | 33 adults, 33 older adults | Adults: 36.4%, older adults: 60.6% | Adults: 63.6%, older adults: 39.4% | Belgium, NR                                         | General population                                                                                       | Last-7-day SB Quest. (SIT-Q-7d)               | Multi                      | Quest.           | Past 7 days               | Sitting/lying down | activPAL       | Sitting        | 7 days    | N/A       | N/A      | Thigh         |
| Camhi, 2015           | 26.7(4.7); 19-35                                  | MHO = 37, MAO = 9          | 0                                  | 100%                               | NR, NR                                              | Metabolically healthy obese (MHO) and metabolically abnormal obese (MAO), in young black and white women | NR                                            | NR                         | Quest.           | NR                        | Sitting            | NR             | ST             | 7 days    | < 100 cpm | NR       | NR            |
| Celis-Morales, 2012   | 37.5 (12.8)                                       | 317                        | 140                                | 177                                | Scotland, Chile, NR                                 | Chilean population (general pop)                                                                         | IPAQ-LF (Spanish version – sitting questions) | Single (weekday + weekend) | Quest.           | Previous 7 days           | Sitting            | Actitrainer    | ST             | 7 days    | < 100 cpm | NR       | Left hip      |

| First Author, year | Age range or mean (SD)                                                   | N analyzed (%) |           |           | Country, Study name                                                                                                      | Population                                       | Self-report measure                       |                             |              |                                  |                                                                             | Device measure          |                |           |           |          |                      |
|--------------------|--------------------------------------------------------------------------|----------------|-----------|-----------|--------------------------------------------------------------------------------------------------------------------------|--------------------------------------------------|-------------------------------------------|-----------------------------|--------------|----------------------------------|-----------------------------------------------------------------------------|-------------------------|----------------|-----------|-----------|----------|----------------------|
|                    |                                                                          | Total          | Men       | Women     |                                                                                                                          |                                                  | Name                                      | Multi-item or single        | Measure type | Recall period*                   | Domain or type                                                              | Name                    | Domain or type | Wear time | Cut-point | Axis     | Wear location        |
| Cerin, 2012        | >65                                                                      | 94             | 42%       | 58%       | Hong Kong, NR                                                                                                            | Urban older adults                               | IPAQ-LF (Chinese – sitting questions)     | Single (weekd ay + weekend) | Quest.       | Last 7 days                      | Sitting                                                                     | ActiGraph GT1M          | ST             | 7 days    | < 100 cpm | Vertical | Right hip            |
| Cerin, 2016        | 43.1 (12.4)                                                              | 3865           | 48.10%    | 51.9%     | Belgium, Czech Republic, Denmark, Spain, UK, US, International Physical Activity and the Environment Network Adult study | General population                               | IPAQ-LF (sitting + motorized)             | Multi (weekd ay + weekend)  | Quest.       | Last 7 days                      | Sitting including motorized transport                                       | ActiGraph GT1M and GT3X | ST             | 7 days    | < 101 cpm | Vertical | Right hip            |
| Chapman, 2016      | 40.3 (11.4)                                                              | 71             | NR        | NR        | Australia, NR                                                                                                            | Non-institutionalised adults with mental illness | Marshall Domain-Specific Sitting Quest.   | Multi                       | Quest.       | Previous week                    | Sitting: travel; at work; TV; computer use; leisure time (not including TV) | ActiGraph GT3X          | ST             | 7 days    | ≤ 100 cpm | Vertical | Right hip            |
| Chasan-Taber, 2004 | 16-40                                                                    | 54             | 0         | 54        | USA, NR                                                                                                                  | Pregnant women                                   | Pregnancy physical activity Quest. (PPAQ) | Multi                       | Quest.       | Current trimester                | SBs: household /care giving, occup., sports/ exercise, travel, inactivity   | ActiGraph MTI           | ST             | 7 days    | NR        | Vertical | Right hip            |
| Chastin, 2018      | Cohort ages were 64 (T07 1950s cohort, n = 310), 79 (LBC1936 , n = 271), | 700            | 339 (48%) | 361 (52%) | Scotland, Seniors USP project                                                                                            | Seniors                                          | Two direct measures of ST                 | Single                      | Quest.       | Past day, usual day or past week | Sitting, TV, multi-SBs                                                      | activPAL                | Sitting/ lying | 7 days    | N/A       | N/A      | Thigh (dominant leg) |
|                    |                                                                          |                |           |           |                                                                                                                          |                                                  | Direct question about total time sitting  | Single                      | Quest.       |                                  | Sitting                                                                     |                         |                |           |           |          |                      |



| First Author, year | Age range or mean (SD) | N analyzed (%)                                                                                                                                                                                                                                          |            |            | Country, Study name | Population         | Self-report measure                                     |                                         |              |                |                                                                                                                         | Device measure       |                |           |           |          |               |
|--------------------|------------------------|---------------------------------------------------------------------------------------------------------------------------------------------------------------------------------------------------------------------------------------------------------|------------|------------|---------------------|--------------------|---------------------------------------------------------|-----------------------------------------|--------------|----------------|-------------------------------------------------------------------------------------------------------------------------|----------------------|----------------|-----------|-----------|----------|---------------|
|                    |                        | Total                                                                                                                                                                                                                                                   | Men        | Women      |                     |                    | Name                                                    | Multi-item or single                    | Measure type | Recall period* | Domain or type                                                                                                          | Name                 | Domain or type | Wear time | Cut-point | Axis     | Wear location |
|                    |                        |                                                                                                                                                                                                                                                         |            |            |                     |                    | outside the home                                        |                                         |              |                |                                                                                                                         |                      |                |           |           |          |               |
|                    |                        |                                                                                                                                                                                                                                                         |            |            |                     |                    | Composite domain sum: work, home, transport and leisure | Multi                                   | Quest.       |                |                                                                                                                         | Domain-specific SB   |                |           |           |          |               |
| Chastin, 2014      | 41.1 (9.0)             | 69                                                                                                                                                                                                                                                      | 23         | 46         | Scotland, NR        | General population | IPAQ-LF (sitting and sitting + motorized)               | Single (weekd ay + weeken d day), multi | Quest.       | Last 7 days    | Sitting with and without motorized transport                                                                            | activPAL             | Sitting/lying  | 7 days    | N/A       | N/A      | Thigh         |
| Chau, 2012         | >18                    | 76                                                                                                                                                                                                                                                      | 60%        | 40%        | Australia, NR       | Workers            | OSPAQ                                                   | Multi                                   | Quest.       | Past 7 days    | Occup. sitting                                                                                                          | ActiGraph GT1M + log | ST             | 7 days    | < 100 cpm | Vertical | Right hip     |
| Chau, 2011         | >18                    | 95; at work = 81, total all domains workday = 82, total all domains non-workday = 76, average total = 82.<br><br>Women: at work = 50, total all domains workday = 51, total all domains non workday = 45, average total = 51.<br>Men: all analyses = 31 | 35 (36.8%) | 60 (63.2%) | Australia, NR       | Workers            | WSQ                                                     | Multi                                   | Quest.       | Past 7 days    | Total all-domain sitting, occup. sitting, TV, computer at home, leisure activities, travel on workdays and non-workdays | ActiGraph GT1M       | ST             | 7 days    | < 100 cpm | Vertical | Right hip     |
|                    |                        | 75 for all analyses. IPAQ = 48 for all                                                                                                                                                                                                                  |            |            |                     |                    | IPAQ-SF                                                 | Single                                  |              | Last 7 days    | Sitting                                                                                                                 |                      |                |           |           |          |               |

| First Author, year | Age range or mean (SD)                                 | N analyzed (%)                                 |                               |                                 | Country, Study name   | Population              | Self-report measure |                      |              |                                |                                                                                               | Device measure    |                       |                            |           |          |               |  |
|--------------------|--------------------------------------------------------|------------------------------------------------|-------------------------------|---------------------------------|-----------------------|-------------------------|---------------------|----------------------|--------------|--------------------------------|-----------------------------------------------------------------------------------------------|-------------------|-----------------------|----------------------------|-----------|----------|---------------|--|
|                    |                                                        | Total                                          | Men                           | Women                           |                       |                         | Name                | Multi-item or single | Measure type | Recall period*                 | Domain or type                                                                                | Name              | Domain or type        | Wear time                  | Cut-point | Axis     | Wear location |  |
|                    |                                                        | analyses. Men: all analyses = 27               |                               |                                 |                       |                         |                     |                      |              |                                |                                                                                               |                   |                       |                            |           |          |               |  |
| Chau, 2014         | 38 (11)                                                | 42; activPAL = 32; WSQ at work on workday = 31 | 6 (14%)                       | 36 (86%)                        | Australia, Stand@Work | Workers                 | WSQ                 | Multi                | Quest.       | Past 7 days                    | Occup. sitting, TV, computer at home, leisure activities, travel on workdays and non-workdays | activPAL3         | Sitting/lying at work | Work week during work time | N/A       | N/A      | Thigh         |  |
|                    |                                                        | activPAL = 32; OSPAQ = 33                      |                               |                                 |                       |                         | OSPAQ               |                      |              |                                | Occup. sitting                                                                                |                   |                       |                            |           |          |               |  |
| Chinapaw, 2009     | 25-38, reliability = 28.9 (3.5), validity = 30.1 (3.6) | Reliability = 58; validity = 47                | Reliability = 20, validity 17 | Reliability = 28, validity = 41 | Netherlands, NR       | Workers                 | AQuAA               | Multi                | Quest.       | Past 7 days                    | SBs                                                                                           | ActiGraph 7164    | ST                    | 2 weeks                    | < 699 cpm | Vertical | Right hip     |  |
| Chu, 2018          | 20-65                                                  | Reliability = 84, validity = 78                | 31%                           | 69%                             | Singapore, NR         | University desk workers | ASBQ                | Multi,               | Quest.       | Typical week                   | Sum of SBs: occup. + travel + leisure + other                                                 | ActiGraph GT3X BT | ST                    | 7 days                     | < 150 cpm | VM       | NR            |  |
|                    |                                                        |                                                |                               |                                 |                       |                         | GPAQ                | Single               | Quest.       | Usual sitting on a typical day | Sitting (single question)                                                                     |                   |                       |                            |           |          |               |  |
| Clark, 2015        | 36-89, mean=59                                         | 700                                            | 45%                           | 55%                             | Australia, NR         | General population      | AusDiab3 Quest.     | Multi                | Quest.       | Past 7 days                    | Sum of weekday + weekend SBs: work, travel, TV, leisure computer use and                      | activPAL3         | Sitting               | 7 days                     | N/A       | N/A      | Right thigh   |  |

| First Author, year | Age range or mean (SD)         | N analyzed (%)                                                                         |          |          | Country, Study name                        | Population                                 | Self-report measure                                 |                      |              |                |                                                                                                                                                                                 | Device measure                     |                |           |           |          |               |
|--------------------|--------------------------------|----------------------------------------------------------------------------------------|----------|----------|--------------------------------------------|--------------------------------------------|-----------------------------------------------------|----------------------|--------------|----------------|---------------------------------------------------------------------------------------------------------------------------------------------------------------------------------|------------------------------------|----------------|-----------|-----------|----------|---------------|
|                    |                                | Total                                                                                  | Men      | Women    |                                            |                                            | Name                                                | Multi-item or single | Measure type | Recall period* | Domain or type                                                                                                                                                                  | Name                               | Domain or type | Wear time | Cut-point | Axis     | Wear location |
|                    |                                |                                                                                        |          |          |                                            |                                            |                                                     |                      |              |                | "other" purposes                                                                                                                                                                |                                    |                |           |           |          |               |
| Clark, 2016        | 18-55                          | 57                                                                                     | 30 (53%) | 27 (47%) | Australia, NR                              | University population (students and staff) | Past-day Adults' Sedentary Time-University (PAST-U) | Multi                | Quest.       | Past day       | Sitting or lying down for work, study, travel, TV viewing, leisure-time computer use, reading, eating, socialising and other purposes                                           | activPAL                           | Sitting        | 1 day     | N/A       | N/A      | Right thigh   |
| Clark, 2011        | median = 34.9 (IQR: 28.5–46.0) | 121                                                                                    | 48 (36%) | 73 (60%) | Australia, Stand Up Australia              | Full time workers                          | NR                                                  | Single               | Quest.       | Past week      | Occupational sitting, breaks in sitting                                                                                                                                         | ActiGraph GT1M + log of work hours | ST at work     | 7 days    | < 100 cpm | Vertical | Right hip     |
| Clark, 2013        | 33-75, 56 (9)                  | Reliability = 86, validity with activPAL = 72 (baseline); validity with ActiGraph = 59 | 0        | 100%     | Australia, Living Well after Breast Cancer | Breast cancer survivors                    | Past-day Adults' Sedentary Time (PAST)              | Multi                | Quest.       | Past day       | Single weekday time spent sitting or lying: at work, travelling, TV, computer (excluding work), reading (excluding work), hobbies, and any other not reported in previous items | activPAL3                          | Sitting/lying  | 7 days    | N/A       | N/A      | Right thigh   |
|                    |                                |                                                                                        |          |          |                                            |                                            |                                                     |                      |              |                |                                                                                                                                                                                 | ActiGraph GT3X                     | ST             |           |           |          |               |



| First Author, year | Age range or mean (SD)                       | N analyzed (%)                                                                  |                                                             |                                                             | Country, Study name                                                | Population                                                               | Self-report measure                      |                                 |                   |                                                   |                                                                                                                                 | Device measure |                |           |           |          |               |
|--------------------|----------------------------------------------|---------------------------------------------------------------------------------|-------------------------------------------------------------|-------------------------------------------------------------|--------------------------------------------------------------------|--------------------------------------------------------------------------|------------------------------------------|---------------------------------|-------------------|---------------------------------------------------|---------------------------------------------------------------------------------------------------------------------------------|----------------|----------------|-----------|-----------|----------|---------------|
|                    |                                              | Total                                                                           | Men                                                         | Women                                                       |                                                                    |                                                                          | Name                                     | Multi-item or single            | Measure type      | Recall period*                                    | Domain or type                                                                                                                  | Name           | Domain or type | Wear time | Cut-point | Axis     | Wear location |
| Clayton, 2016      | 77.4 (7.5)                                   | 15                                                                              | 15                                                          | 0                                                           | USA, NR                                                            | Men with prostate cancer and history of Androgen-Deprivation Therapy use | IPAQ-SF                                  | Single                          | Quest.            | Usual day past 7 days                             | Sitting (single question)                                                                                                       | activPAL3      | Sitting        | 7 days    | N/A       | N/A      | Thigh         |
| Cleland, 2014      | 44 (14)                                      | 65                                                                              | 31 (48%)                                                    | 34 (52%)                                                    | Ireland, NR                                                        | Middle-aged men and women                                                | GPAQ                                     | Single                          | Quest.            | Usual day                                         | Sitting (single question)                                                                                                       | ActiGraph GT3X | ST             | 7 days    | ≤ 100 cpm | NR       | Hip           |
| Cleland, 2018      | 71.8 (6.6)                                   | 228                                                                             | 129                                                         | 97                                                          | Ireland, Healthy Urban Living and Ageing in Place                  | Older adults                                                             | IPAQ-LF                                  | Single (weekd ay + weekend day) | Quest.            | Usual day previous 7 days                         | Sitting                                                                                                                         | ActiGraph GT3X | ST             | 7 days    | ≤ 99 cpm  | NR       | Right hip     |
| Clemes, 2012       | 41.5 (12.8)                                  | 44                                                                              | 30%                                                         | 70%                                                         | UK, NR                                                             | University staff                                                         | NR                                       | Single                          | Daily sitting log | Past day sitting                                  | Sitting                                                                                                                         | ActiGraph GT1M | ST             | 7 days    | < 100 cpm | Vertical | NR            |
|                    |                                              |                                                                                 |                                                             |                                                             |                                                                    |                                                                          |                                          | Multi                           | Quest.            | Usual weekday and weekend day                     | Travel, work, TV, using a computer at home, and leisure time, not including TV (e.g. visiting friends, movies, dining out etc.) |                |                |           |           |          |               |
| Conroy, 2013       | 21.3 (1.1)                                   | 128                                                                             | 53                                                          | 75                                                          | USA, NR                                                            | College students                                                         | IPAQ-SF (modified)                       | Single                          | Quest.            | Daily recall                                      | Sitting (single question)                                                                                                       | ActiGraph GT3X | ST             | 7 days    | < 100 cpm | NR       | Right hip     |
| Craig, 2003        | Aust = 35.9 (11.7), BRA = 42.9 (14.2), UK1 = | Aus = 62, Brazil = 28, UK1 = 149, UK2 = 101, FIN = 88, GU = 41, 40, 34, 40, CSA | Aus = 40 (65%), Brazil = 12 (43%), UK1 = 68 (46%), UK2 = 38 | Aus = 22 (35%), Brazil = 16 (57%), UK1 = 81 (54%), UK2 = 63 | Australia, Brazil, Canada, Finland, Guatemala, Netherlands, Japan, | General population                                                       | IPAQ-SF, IPAQ-LF (sitting question only) | Single                          | Quest.            | Tested last 7 days and usual week (meta-analysis) | Sitting (single question)                                                                                                       | CSA 7164       | ST             | 7 days    | < 100 cpm | Vertical | NR            |

| First Author, year  | Age range or mean (SD)                                                                                                                                                                                                                                                                                           | N analyzed (%)                                                                                                        |                                                                                                                                                                                                                                                                    |                                                                                                                                                                                                                                                                       | Country, Study name                                               | Population        | Self-report measure           |                      |              |                              |                | Device measure          |                |           |           |          |               |
|---------------------|------------------------------------------------------------------------------------------------------------------------------------------------------------------------------------------------------------------------------------------------------------------------------------------------------------------|-----------------------------------------------------------------------------------------------------------------------|--------------------------------------------------------------------------------------------------------------------------------------------------------------------------------------------------------------------------------------------------------------------|-----------------------------------------------------------------------------------------------------------------------------------------------------------------------------------------------------------------------------------------------------------------------|-------------------------------------------------------------------|-------------------|-------------------------------|----------------------|--------------|------------------------------|----------------|-------------------------|----------------|-----------|-----------|----------|---------------|
|                     |                                                                                                                                                                                                                                                                                                                  | Total                                                                                                                 | Men                                                                                                                                                                                                                                                                | Women                                                                                                                                                                                                                                                                 |                                                                   |                   | Name                          | Multi-item or single | Measure type | Recall period*               | Domain or type | Name                    | Domain or type | Wear time | Cut-point | Axis     | Wear location |
|                     | 35.2 (10.6), UK2 = 41.1 (8.4), CAN = 49.2 (14.8), 46.5 (16.5), 39.1 (17.5), FIN = 55.6 (8.6), GU = 25.9 (5.0), NET = 32.7 (10.9), JAP = 33.8 (10.2), PORT = 351 (11.5), USA1 = 48.9 (6.1), SA = 31.8 (12.0), 35.6 (12.1), 32.3 (8.5), 31.6 (7.5), USA2 = 37.4 (11.9), 36.1 (12.8), SW = 40.7 (10.8), 47.1 (13.6) | 61, Netherlands = 74, Japan = 144, Portugal = 196, USA1 = 28, SA = 144, 108, 107, 92, USA2 = 30, 30, Sweden = 50, 200 | (38%), FIN = 43 (49%), GU = 23 (56%), 20 (50%), 16 (47%), 19 (48%), 45 (73%), Netherland ds = 34 (40%), Japan = 74 (51%), Portugal = 96 (49%), USA1 = 7 (25%), SA = 76 (53%), 48 (44%), 54 (51%), 46 (50%), USA2 = 15 (50%), 14 (47%), Sweden = 22 (44%), 77 (39%) | (62%), FIN = 45 (51%), GU = 18 (44%), 20 (50%), 18 (53%), 21 (52%), 16 (27%), Netherland ds = 40 (60%), Japan = 70 (49%), Portugal = 100 (51%), USA1 = 21 (75%), SA = 68 (47%), 60 (56%), 53 (49%), 46 (50%), USA2 = 15 (50%), 16 (53%), Sweden = 28 (56%), 123 (61%) | Portugal, South Africa, Sweden, United States, United Kingdom, NR |                   |                               |                      |              | used weekday on past 7 days) |                |                         |                |           |           |          |               |
| Curry, 2015         | 40.1 (10.5)                                                                                                                                                                                                                                                                                                      | 50                                                                                                                    | 0                                                                                                                                                                                                                                                                  | 50 (100%)                                                                                                                                                                                                                                                             | Wales, NR                                                         | South Asian women | IPAQ-SF                       | Single               | Quest.       | Previous 7 days              | Sitting        | ActiGraph GT1M and GT3X | ST             | 7 days    | ≤ 50 cpm  | Vertical | Waist         |
| Dahl-Petersen, 2013 | men = 44.8 (14.2),                                                                                                                                                                                                                                                                                               | 1508                                                                                                                  | 659                                                                                                                                                                                                                                                                | 849                                                                                                                                                                                                                                                                   | Greenland, NR                                                     | Inuit             | Modified IPAQ-LF (Greenlandic | Single               | Quest.       | Previous 7 days              | Sitting        | Actiheart               | ST             | 2-5 days  | < 1.5 MET | NR       | Chest         |

| First Author, year | Age range or mean (SD)                            | N analyzed (%)                                                                                           |                                   |                                   | Country, Study name        | Population                     | Self-report measure   |                      |              |                 |                                                                                                                                            | Device measure |                |                    |           |          |               |
|--------------------|---------------------------------------------------|----------------------------------------------------------------------------------------------------------|-----------------------------------|-----------------------------------|----------------------------|--------------------------------|-----------------------|----------------------|--------------|-----------------|--------------------------------------------------------------------------------------------------------------------------------------------|----------------|----------------|--------------------|-----------|----------|---------------|
|                    |                                                   | Total                                                                                                    | Men                               | Women                             |                            |                                | Name                  | Multi-item or single | Measure type | Recall period*  | Domain or type                                                                                                                             | Name           | Domain or type | Wear time          | Cut-point | Axis     | Wear location |
|                    | women = 43.1 (13.8)                               |                                                                                                          |                                   |                                   |                            |                                | , sitting questions)  |                      |              |                 |                                                                                                                                            |                |                |                    |           |          |               |
| De Cocker, 2016    | 40.3 (9.1)                                        | 122; WSQ: tailored = 36, generic = 64, control = 28; ActivPAL: tailored = 35, generic = 35, control = 23 | NR                                | NR                                | Belgium, NR                | Flemish employees              | WSQ                   | Multi                | Quest.       | Last 7 days     | Sitting on workday and non-workday while: in travel, at work, TV, computer at home (non-work related), and; doing other leisure activities | activPAL       | Sitting        | 5 days (work days) | N/A       | N/A      | Thigh         |
| De Greef, 2011     | 62 (9)                                            | 92; Intervention = 60, control = 32                                                                      | 69%                               | 31%                               | Belgium, NR                | Patients with Type 2 diabetes  | IPAQ (version NR)     | Single               | Quest.       | Last 7 days     | Sitting                                                                                                                                    | ActiGraph 7164 | ST             | 5 days             | < 100 cpm | Vertical | NR            |
| Doyle, 2018        | Reliability: 21.27 (2.32), validity: 19.30 (1.87) | Validity = 43, reliability = 86                                                                          | Reliability: 41%, validity: 39.5% | Reliability: 59%, validity: 60.5% | United Arab Emirates, NR   | Emirati university students    | GPAQ (Arabic version) | Single               | Quest.       | Typical week    | Sitting                                                                                                                                    | ActiGraph GT3X | ST             | 7 days             | < 100 cpm | NR       | Right hip     |
| Duncan, 2019       | Validity: 42.3 (11.9), reliability: 41.9 (11.8)   | 74                                                                                                       | Validity: 47, reliability: 48     | Validity: 27, reliability: 26     | Canada, NR                 | Individuals with schizophrenia | IPAQ-SF               | Single (week day)    | Quest.       | Last 7 days     | Sitting                                                                                                                                    | ActiGraph GT3X | ST             | 7 days             | ≤ 99 cpm  | VM       | Right hip     |
| Dyrstad, 2014      | 48.2 (14.1)                                       | 1751                                                                                                     | 878 (50.1%)                       | 873 (49.1%)                       | Norway, NR                 | General population             | IPAQ-SF               | Single               | Quest.       | Last 7 days     | Sitting                                                                                                                                    | ActiGraph GT1M | ST             | 7 days             | < 100 cpm | Vertical | NR            |
| Ekblom, 2015       | 50-65                                             | 948                                                                                                      | 462                               | 486                               | Sweden, SCAPIS pilot study | General population             | NR                    | Single               | Quest.       | Previous 7 days | Sitting                                                                                                                                    | ActiGraph GT3X | ST             | 4 days             | < 200 cpm | VM       | Right hip     |

| First Author, year | Age range or mean (SD)                           | N analyzed (%)                               |                         |                                 | Country, Study name | Population                                                               | Self-report measure              |                                 |              |                            |                                          | Device measure |                |           |           |          |                                    |
|--------------------|--------------------------------------------------|----------------------------------------------|-------------------------|---------------------------------|---------------------|--------------------------------------------------------------------------|----------------------------------|---------------------------------|--------------|----------------------------|------------------------------------------|----------------|----------------|-----------|-----------|----------|------------------------------------|
|                    |                                                  | Total                                        | Men                     | Women                           |                     |                                                                          | Name                             | Multi-item or single            | Measure type | Recall period*             | Domain or type                           | Name           | Domain or type | Wear time | Cut-point | Axis     | Wear location                      |
| Ekelund, 2006      | 20-69; men 42 (13); women 41.6 (13)              | 185                                          | 87                      | 98                              | Sweden, NR          | Workers                                                                  | IPAQ-SF                          | Single                          | Quest.       | Last 7 days                | Sitting                                  | ActiGraph 7164 | ST             | 7 days    | < 100 cpm | Vertical | Waist                              |
| Ellingson, 2012    | 30.0 (5.8)                                       | 21; meets recommendations = 12; inactive = 9 | 0                       | 21                              | USA, NR             | Healthy women                                                            | IPAQ-LF (sitting questions only) | Single (weekd ay + weekend day) | Quest.       | Last 7 days                | Sitting                                  | ActiGraph GT1M | ST             | 7 days    | < 100 cpm | Vertical | Hip                                |
| Eramli, 2017       | 56 (15)                                          | 76; 39 intervention, 37 control              | 13                      | 63                              | Scotland, NR        | People within first 5 years of being diagnosed with rheumatoid arthritis | IPAQ-LF (sitting questions only) | Single (weekd ay + weekend day) | Quest.       | Previous 7 days            | Sitting                                  | activPAL       | Sitting/lying  | 7 days    | N/A       | N/A      | Right thigh                        |
| Emadian, 2017      | 45.0 (9.79)                                      | 54                                           | 54 (100%)               | 0                               | England, NR         | Overweight & obese South Asian men                                       | IPAQ-LF (sitting questions only) | Single (weekd ay + weekend day) | Quest.       | Last 7 days                | Sitting                                  | ActiGraph GT3X | ST             | 7 days    | < 100 cpm | NR       | Right hip                          |
| English, 2016      | Stroke: 67.2 (11.1); healthy control: 70.4 (7.8) | Stroke = 39, healthy = 22                    | Stroke: 26, control: 14 | Stroke: 14, control: 8          | Australia, NR       | Individuals who had experienced a stroke                                 | MARCA                            | Multi                           | Quest.       | Past day                   | SBs (TV, video games, reading, computer) | activPAL3      | Sitting        | 7 days    | N/A       | N/A      | Thigh (non-paretic thigh or right) |
| Fitzsimons, 2012   | 37 (11)                                          | 41                                           | 23                      | 18                              | Scotland, NR        | Scottish adults                                                          | IPAQ-LF (weekday only)           | Single                          | Quest.       | Last 7 days                | Sitting (weekday)                        | activPAL3      | Sitting/lying  | 3 days    | N/A       | N/A      | NR                                 |
| Fitzsimons, 2013   | 68 (6)                                           | 24; 22 activPAL, 23 SBQ                      | 14                      | 10                              | Scotland, NR        | Older Scottish adults                                                    | SBQ                              | Multi                           | Quest.       | Usual weekday and weekend  | Total ST (combined items)                | activPAL3      | Sitting/lying  | 7 days    | N/A       | N/A      | NR                                 |
| Fjeldsoe, 2009     | Validity = 32 (5), reliability = 33 (5)          | Validity = 75, reliability = 40              | 0                       | Validity = 75, reliability = 40 | Australia, NR       | Women with young children                                                | AWAS                             | Multi                           | Quest.       | Typical week in past month | Sitting (across multiple domains)        | ActiGraph MT1  | ST             | 7 days    | ≤ 100 cpm | Vertical | Waist                              |

| First Author, year | Age range or mean (SD)      | N analyzed (%)               |             |             | Country, Study name                 | Population                         | Self-report measure                                                                      |                      |                  |                                                                              |                                                                                             | Device measure |                |             |                   |                   |               |
|--------------------|-----------------------------|------------------------------|-------------|-------------|-------------------------------------|------------------------------------|------------------------------------------------------------------------------------------|----------------------|------------------|------------------------------------------------------------------------------|---------------------------------------------------------------------------------------------|----------------|----------------|-------------|-------------------|-------------------|---------------|
|                    |                             | Total                        | Men         | Women       |                                     |                                    | Name                                                                                     | Multi-item or single | Measure type     | Recall period*                                                               | Domain or type                                                                              | Name           | Domain or type | Wear time   | Cut-point         | Axis              | Wear location |
| Fowles, 2017       | Women: 55 (10); men: 63 (9) | 35                           | 6           | 26          | Canada, NR                          | University population              | Canadian Society for Exercise Physiology Physical Activity and Sedentary Behavior Quest. | Multi                | Quest.           | NR                                                                           | Sum: occup. + leisure + total sitting                                                       | ActiGraph GT3X | ST             | 7 days      | Wear time - MVP A | NR                | NR            |
| French, 2007       | IPAQ: 47.6 (10.2)           | IPAQ = 1092, ActiGraph = 158 | IPAQ: 78.4% | IPAQ: 21.6% | USA, Route H Study                  | Transportation workers             | Modified IPAQ-SF                                                                         | Single               | Quest.           | Daily recall previous 7 days                                                 | Sitting                                                                                     | ActiGraph      | ST             | 4 days      | ≤ 250 cpm         | VM                | NR            |
| Gao, 2017          | 33.1 (10.7)                 | 70                           | 29 (41.4%)  | 41 (58.6%)  | Finland, China, NR                  | Finnish and Chinese office workers | Long-term and short-term ST                                                              | Single               | Quest.           | Long-term: average workday in past 3 months; short-term: past day average ST | Occup. sitting                                                                              | X6-1a          | ST             | 5 work days | N/A               | Used inclinometer | Thigh         |
| Gardiner, 2011     | 72.8 (8.1)                  | 48                           | 13 (27.1%)  | 35 (72.9%)  | Australia, Stand Up for Your Health | Older adults                       | Modified Salmon Quest.                                                                   | Multi                | Interview Quest. | Past week                                                                    | Total ST: TV, computer use, reading, socialising, travel and hobbies, and a summary measure | ActiGraph GT1M | ST             | 6 days      | < 100 cpm         | Vertical          | Right hip     |
| Gennuso, 2015      | 75.1 (6.5)                  | 58                           | 21%         | 79%         | USA, NR                             | Older adults                       | YPAS                                                                                     | Multi                | Quest.           | Typical week over past month                                                 | SBs                                                                                         | ActiGraph GT1M | ST             | 10 days     | < 100 cpm         | Vertical          | Right hip     |

| First Author, year | Age range or mean (SD)         | N analyzed (%)         |             |                           | Country, Study name                                                                     | Population                         | Self-report measure                    |                      |              |                                        |                                                                                                                                         | Device measure    |                |           |           |          |               |
|--------------------|--------------------------------|------------------------|-------------|---------------------------|-----------------------------------------------------------------------------------------|------------------------------------|----------------------------------------|----------------------|--------------|----------------------------------------|-----------------------------------------------------------------------------------------------------------------------------------------|-------------------|----------------|-----------|-----------|----------|---------------|
|                    |                                | Total                  | Men         | Women                     |                                                                                         |                                    | Name                                   | Multi-item or single | Measure type | Recall period*                         | Domain or type                                                                                                                          | Name              | Domain or type | Wear time | Cut-point | Axis     | Wear location |
|                    |                                |                        |             |                           |                                                                                         |                                    | CHAMPS                                 | Multi                | Quest.       | Frequency / duration over past 4 weeks | SBs                                                                                                                                     |                   |                |           |           |          |               |
| Gennuso, 2016      | 70 (8)                         | 44                     | 16          | 28 (64%)                  | USA, NR                                                                                 | Older adults                       | Modified Salmon Quest. (Gardiner)      | Multi                | Quest.       | Past week                              | Sum: TV, computer, reading, socializing, driving or in public transportation, hobbies, and other activities                             | activPAL          | Sitting/lying  | 1 week    | N/A       | N/A      | Right hip     |
| Gibbs, 2015        | median (IQR): 30.9 (27.8-33.7) | 448                    | 133 (29.7%) | 315 (70.3%)               | USA, IDEA Study                                                                         | Overweight & obese young adults    | EARLY Trials Sedentary Behavior Quest. | Multi                | Quest.       | Typical weekday and weekend            | Sum: TV, computer or video games, office work, reading or other recreation, using a phone, and travel-work, using a computer, paperwork | SenseWear armband | ST             | 7 days    | N/A       | N/A      | Arm           |
|                    |                                |                        |             |                           |                                                                                         |                                    | GPAQ                                   |                      |              |                                        |                                                                                                                                         |                   |                |           |           |          |               |
| Gilbert, 2016      | 55 .11 (13.91)                 | 154 (valid accel data) | NR          | Full sample: 142 (82.56%) | USA, Increasing Motivation for Physical Activity in Arthritis Clinical Trial (IM PAACT) | Patients with Rheumatoid Arthritis | modified YPAS                          | Multi                | Quest.       | Typical week in past month             | SBs                                                                                                                                     | ActiGraph GT1M    | ST             | 7 days    | < 100 cpm | Vertical | Right hip     |

| First Author, year | Age range or mean (SD)             | N analyzed (%) |           |           | Country, Study name                                                                         | Population                           | Self-report measure                    |                      |              |                             |                                                             | Device measure  |                       |                      |                            |          |                       |
|--------------------|------------------------------------|----------------|-----------|-----------|---------------------------------------------------------------------------------------------|--------------------------------------|----------------------------------------|----------------------|--------------|-----------------------------|-------------------------------------------------------------|-----------------|-----------------------|----------------------|----------------------------|----------|-----------------------|
|                    |                                    | Total          | Men       | Women     |                                                                                             |                                      | Name                                   | Multi-item or single | Measure type | Recall period*              | Domain or type                                              | Name            | Domain or type        | Wear time            | Cut-point                  | Axis     | Wear location         |
| Golubic, 2014      | Women: 54.0 (9.3), men: 55.0 (9.9) | 1923           | 580       | 1343      | Denmark, France, Germany, Greece, Italy, Netherlands, Norway, Spain, Sweden, and UK, NR     | Middle-aged men and women            | Recent Physical Activity Quest. (RPAQ) | Multi                | Quest.       | Past 4 weeks                | SBs: leisure time, occupation, commuting, and domestic life | Actiheart       | ST                    | Minimum 4 days       | ≤ 1.5 METs                 | N/A      | chest                 |
| Gomersall, 2015    | 28 (7.4)                           | 58             | 30 (52%)  | 28 (48%)  | Australia, NR                                                                               | Adults from an Australian university | MARCA                                  | Multi                | Quest.       | Previous day                | SBs                                                         | activPAL        | Sitting/lying         | 24 hours (wake time) | N/A                        | N/A      | Right thigh           |
| Gordon, 2013       | 45.5 (12.7)                        | 24             | 8         | 16        | USA, NR                                                                                     | Adults with sedentary occupations    | IPAQ-SF                                | Single               | Quest.       | Past 7 days                 | Total weekday sitting                                       | ActiGraph GT3X  | ST                    | 1 week               | < 100 cpm                  | NR       | Right hip             |
|                    |                                    |                |           |           |                                                                                             |                                      | SBQ                                    | Multi                | Quest.       | Usual weekday & weekend day | SBs                                                         | activPAL        | Sitting/lying at work |                      | N/A                        | N/A      | Thigh                 |
| Grimm, 2012        | 63.9 (7.7)                         | 127            | 31        | 96        | USA, NR                                                                                     | Older adults                         | IPAQ-SF                                | Single               | Quest.       | Previous week               | Sitting                                                     | ActiGraph 7164  | ST                    | 7 days               | ≤ 50 cpm                   | Vertical | Right hip             |
| Gupta, 2017        | 44.9 (9.8)                         | 183            | 110 (60%) | 73 (40%)  | Denmark, New method for Objective Measurements of physical Activity in Daily living (NOMAD) | Blue collar workers                  | None                                   | Single               | Quest.       | Past 24 hours               | Work day sitting                                            | ActiGraph GT3X+ | Work day sitting      | 2 work days          | Inclinometer function      | N/A      | Right thigh           |
| Haakstad, 2010     | 32.3 (3.6)                         | 77             | 0         | 77        | Norway, NR                                                                                  | Pregnant women                       | PAPQ                                   | Multi                | Quest.       | NR                          | Daily sitting/lying                                         | ActiReg         | Sitting/lying         | 7 days               | Used inclinometer function | NR       | Right thigh and chest |
| Hagstromer, 2010   | 18-65                              | 980            | 443 (44%) | 537 (56%) | Sweden, NR                                                                                  | General population                   | IPAQ-LF (sitting)                      | Single (weekday +)   | Quest.       | Last 7 days                 | Sitting                                                     | ActiGraph 7164  | ST                    | 7 days               | < 100 cpm                  | Vertical | Lower back            |

| First Author, year | Age range or mean (SD)                     | N analyzed (%)                                                                                                                                    |                              |                              | Country, Study name                          | Population                                       | Self-report measure              |                                |              |                             |                                                            | Device measure         |                                      |           |           |          |                           |                      |
|--------------------|--------------------------------------------|---------------------------------------------------------------------------------------------------------------------------------------------------|------------------------------|------------------------------|----------------------------------------------|--------------------------------------------------|----------------------------------|--------------------------------|--------------|-----------------------------|------------------------------------------------------------|------------------------|--------------------------------------|-----------|-----------|----------|---------------------------|----------------------|
|                    |                                            | Total                                                                                                                                             | Men                          | Women                        |                                              |                                                  | Name                             | Multi-item or single           | Measure type | Recall period*              | Domain or type                                             | Name                   | Domain or type                       | Wear time | Cut-point | Axis     | Wear location             |                      |
|                    |                                            |                                                                                                                                                   |                              |                              |                                              |                                                  | questions only)                  | weekend day)                   |              |                             |                                                            |                        |                                      |           |           |          |                           |                      |
| Hansen, 2014       | 49.0 (13.2)                                | 121                                                                                                                                               | 57                           | 64                           | Denmark, Danish Health Examination Survey    | General population                               | IPAQ-LF (sitting questions only) | Single (weekday + weekend day) | Quest.       | Past 7 days                 | Sitting                                                    | ActiHeart              | ST                                   | 7 days    | < 1.5 MET | N/A      | Chest                     |                      |
| Headley, 2018      | 48.48 (11.39)                              | 127                                                                                                                                               | 86 (68%)                     | 41 (32%)                     | USA, NR                                      | College employees                                | OSPAQ                            | Multi                          | Quest.       | Past 7 days                 | Occup. sitting                                             | activPAL3              | Sitting (occupational and total day) | 7 days    | N/A       | N/A      | Thigh                     |                      |
| Hekler, 2012       | 75.3 (6.8)                                 | 870                                                                                                                                               | 44%                          | 56%                          | USA, Seniors Neighborhood Quality Life Study | Older adults (65+)                               | CHAMPS                           | Multi                          | Quest.       | Past 4 weeks                | ST: TV, reading, socialize, passive transit, attend events | ActiGraph 7164 & 71256 | ST                                   | 7 days    | ≤ 100 cpm | Vertical | Waist                     |                      |
| Herrmann, 2013     | Study 1: 43.1 ± 11.4, study 2: 40.2 ± 12.6 | Study 1/ validity: 53 (wore accel), reliability: 16; GPAQ Category: Low (n = 14) ; GPAQ Category: Moderate (n = 39); GPAQ Category: High (n = 16) | Validity: 12, reliability: 8 | Validity: 57, reliability: 8 | USA, NR                                      | General population                               | GPAQ                             | Single                         | Quest.       | Usual day in a typical week | Sitting                                                    | ActiGraph GT1M         | ST                                   | 7 days    | < 100 cpm | Vertical | Waist                     |                      |
|                    |                                            |                                                                                                                                                   |                              |                              |                                              |                                                  | IPAQ-SF                          |                                |              |                             |                                                            |                        |                                      |           |           |          |                           | Weekdays last 7 days |
| Hoos, 2012         | 43.01 (9.05)                               | 72                                                                                                                                                | 0                            | 72                           | USA, NR                                      | Adult Latinas                                    | GPAQ                             | Single                         | Quest.       | Usual day                   | Sitting                                                    | ActiGraph GT1M         | ST                                   | 7 days    | NR        | Vertical | Right hip                 |                      |
| Hur, 2019          | 70 (9)                                     | 111                                                                                                                                               | 69 (62%)                     | 42 (38%)                     | Canada, NR                                   | Patients with fibrotic interstitial lung disease | IPAQ-LF (sitting questions only) | Single (weekday + weekend day) | Quest.       | Last 7 days                 | Sitting                                                    | ActiGraph GT3X         | ST                                   | 7 days    | < 100 cpm | NR       | Waist (non-dominant side) |                      |



| First Author, year   | Age range or mean (SD)              | N analyzed (%)                                |                                                  |                                                  | Country, Study name | Population                                      | Self-report measure |                      |              |                                 |                                                                                                                                                      | Device measure                      |                |                |             |           |                     |
|----------------------|-------------------------------------|-----------------------------------------------|--------------------------------------------------|--------------------------------------------------|---------------------|-------------------------------------------------|---------------------|----------------------|--------------|---------------------------------|------------------------------------------------------------------------------------------------------------------------------------------------------|-------------------------------------|----------------|----------------|-------------|-----------|---------------------|
|                      |                                     | Total                                         | Men                                              | Women                                            |                     |                                                 | Name                | Multi-item or single | Measure type | Recall period*                  | Domain or type                                                                                                                                       | Name                                | Domain or type | Wear time      | Cut-point   | Axis      | Wear location       |
| Hurtig-Wennlof, 2010 | >65                                 | 54                                            | 23                                               | 31                                               | Sweden, NR          | Elderly (65+)                                   | Modified IPAQ-SF    | Single               | Quest.       | Last 7 days                     | Sitting                                                                                                                                              | ActiGraph GT1M                      | ST             | 7 days         | < 100 cpm   | Vertical  | Waist               |
| Hutchison, 2018      | FM = 63.6 (7.40), CO = 72.5 (8.17)  | 35 (FM = 20, CO = 15)                         | 20% FM = 1, C = 6                                | 80% FM = 19, C = 9                               | USA, NR             | Older adults (with and without fibromyalgia)    | SBQ                 | Multi                | Quest.       | Typical weekday and weekend day | Total SB                                                                                                                                             | ActiGraph WGT3X                     | ST             | 7 days         | < 100 cpm   | Vertical  | Waist               |
| Igelström, 2013      | median = 60 (IQR: 16)               | 34                                            | NR                                               | NR                                               | Sweden, NR          | People with obstructive sleep apnea and obesity | IPAQ-SF             | Single               | Quest.       | Weekdays last 7 days            | Sitting                                                                                                                                              | SenseWear Pro 3                     | ST             | 5-7 days       | N/A         | N/A       | Arm                 |
|                      |                                     | 33                                            |                                                  |                                                  |                     |                                                 | Logbook             |                      |              |                                 |                                                                                                                                                      |                                     |                |                |             |           |                     |
| Innerd, 2018         | 44 (9.2), 24-60                     | 117; normal = 37, overweight = 37, obese = 43 | 57 (49%)                                         | 60 (51%)                                         | UK, NR              | University staff or students                    | IPAQ-SF             | Single               | Quest.       | Past day (modified)             | Sitting                                                                                                                                              | ActiGraph GT3X+                     | ST             | 3 days         | N/A         | VM        | Waist               |
| Ishii, 2018          | 50.1 (7), reliability = 40.3 (11.4) | Validity = 392, reliability = 34              | Validity = 156 (39.8%), reliability = 20 (58.8%) | Validity = 236 (60.2%), reliability = 14 (41.2%) | Japan, NR           | Japanese adults                                 | NR                  | Multi                | Quest.       | Past 7 days                     | Work and non-workdays<br>ST in: car travel; public travel; at work; TV/videos /DVDs; computer, cell phone or tablet outside of work; in leisure time | Active Style Pro HJA-350IT          | ST             | 7 days         | ≤ 1.5 MET S | Tri-axial | NR                  |
| Jancey, 2014         | 18+                                 | Validity = 41, reliability = 99               | Validity = 17, reliability = 36                  | Validity = 24, reliability = 63                  | Australia, NR       | Office workers                                  | OSPAQ               | Multi                | Quest.       | Past 5 working days             | Occup. sitting                                                                                                                                       | ActiGraph GT3X+ (worn at work only) | ST             | 5 working days | < 100 cpm   | Vertical  | Waist or left thigh |
| Kim, 2018            | 33.3 (11.4)                         | 27                                            | 15                                               | 12                                               | USA, NR             | University staff or students                    | Sedentary Behavior  | Multi                | Diary record | Past day                        | SBs                                                                                                                                                  | Autographer (camera + tri-axial)    | SBs            | 4 days (2 week | N/A         | N/A       | Around neck         |

| First Author, year | Age range or mean (SD)                    | N analyzed (%)                               |                                             |                                             | Country, Study name                                                                         | Population                         | Self-report measure              |                                |              |                                |                                         | Device measure            |                 |                           |                   |          |               |  |
|--------------------|-------------------------------------------|----------------------------------------------|---------------------------------------------|---------------------------------------------|---------------------------------------------------------------------------------------------|------------------------------------|----------------------------------|--------------------------------|--------------|--------------------------------|-----------------------------------------|---------------------------|-----------------|---------------------------|-------------------|----------|---------------|--|
|                    |                                           | Total                                        | Men                                         | Women                                       |                                                                                             |                                    | Name                             | Multi-item or single           | Measure type | Recall period*                 | Domain or type                          | Name                      | Domain or type  | Wear time                 | Cut-point         | Axis     | Wear location |  |
|                    |                                           |                                              |                                             |                                             |                                                                                             |                                    | Record (SBR)                     |                                |              |                                |                                         |                           | accelerometer)) |                           | day + 2 week end) |          |               |  |
| Kim, 2017          | 46.2 (SE=0.4)                             | 1458                                         | 610                                         | 848                                         | USA, Physical Activity Measurement Survey                                                   | General population                 | 24-Hour Physical Activity Recall | Multi                          | Recall diary | 24 hour recall                 | SBs                                     | SenseWear Armband Mini    | ST              | 24 hours (excludes sleep) | N/A               | N/A      | Arm           |  |
| King, 2016         | 60.0 (9.3)                                | 89                                           | 22                                          | 67                                          | USA, NR                                                                                     | Underactive adults                 | EMA                              | N/A                            | EMA          | Past day                       | Sitting                                 | Smart phone accelerometer | ST              | 24 hours (wakeful time)   | ≤ 56 cpm          | NR       | NR            |  |
| Knell, 2017        | 43.3 (13.1)                               | 238                                          | 115 (48.3%)                                 | 123 (51.7%)                                 | USA, Pathways between Socioeconomic Status and Behavioral Cancer Risk Factors Study (PATHS) | Community dwelling adults          | EMA                              | Multi                          | EMA          | Past 24-h (i.e. previous day)  | SB                                      | ActiGraph GT3X            | ST              | 7 days                    | NR                | Vertical | Dominant hip  |  |
|                    |                                           |                                              |                                             |                                             |                                                                                             |                                    | NHANES                           | Multi                          | Quest.       | Usual week                     | TV and computer use weekday and weekend |                           |                 |                           |                   |          |               |  |
|                    |                                           |                                              |                                             |                                             |                                                                                             |                                    | IPAQ-LF (sitting questions only) | Single (weekday + weekend day) | Quest.       | Past 7 days                    | Sitting                                 |                           |                 |                           |                   |          |               |  |
| Kohler, 2017       | Validity = 50 (13), reliability = 52 (13) | Validity = 49, reliability, reliability = 67 | Validity = 24 (49%), reliability = 33 (49%) | Validity = 25 (51%), reliability = 34 (51%) | Germany, German National Cohort pilot study                                                 | Healthy, community dwelling adults | cpar24                           | N/A                            | 24-h recall  | Previous 24 hours              | SBs                                     | ActiGraph GT3X            | ST              | 3 days                    | < 100 cpm         | NR       | NR            |  |
| Kozey-Keadle, 2012 | 46.5 (10.8)                               | 13                                           | NR                                          | NR                                          | USA, NR                                                                                     | Overweight, non-exercising         | IPAQ-SF                          | Single                         | Quest.       | Typical workday in last 7 days | Sitting                                 | activPAL                  | Sitting         | 7 days                    | N/A               | N/A      | Right thigh   |  |

| First Author, year    | Age range or mean (SD)                          | N analyzed (%)                                                         |                                 |                                  | Country, Study name                                                                                     | Population                                       | Self-report measure                                  |                                 |              |                 |                                                                     | Device measure         |                |           |                         |          |               |
|-----------------------|-------------------------------------------------|------------------------------------------------------------------------|---------------------------------|----------------------------------|---------------------------------------------------------------------------------------------------------|--------------------------------------------------|------------------------------------------------------|---------------------------------|--------------|-----------------|---------------------------------------------------------------------|------------------------|----------------|-----------|-------------------------|----------|---------------|
|                       |                                                 | Total                                                                  | Men                             | Women                            |                                                                                                         |                                                  | Name                                                 | Multi-item or single            | Measure type | Recall period*  | Domain or type                                                      | Name                   | Domain or type | Wear time | Cut-point               | Axis     | Wear location |
|                       |                                                 |                                                                        |                                 |                                  |                                                                                                         | office workers                                   | Domain-Specific Quest. (D-SQ)                        | multi                           |              | Previous 7 days | Travel, TV, occup., computer at home, leisure time not including TV | ActiGraph GT3X         | ST             |           | 100 & 150 cpm           | NR       | Right hip     |
| Kozo, 2012            | 45.1 (11.0)                                     | 2199                                                                   | 1139 (51.8%)                    | 1058 (48.2%)                     | USA, Neighborhood Quality of Life Study                                                                 | Community dwelling adults                        | IPAQ-LF (sitting questions only)                     | Single (weekd ay + weekend day) | Quest.       | Previous 7 days | Sitting                                                             | ActiGraph 7164 & 71256 | ST             | 7 days    | < 100 cpm               | Vertical | Waist         |
| Laeremans, 2017       | 35 (10)                                         | 122                                                                    | 45%                             | 55%                              | Spain, England, Belgium, FP7 PASTA Project (Physical Activity through Sustainable Transport Approaches) | Healthy adults                                   | GPAQ                                                 | Single                          | Quest.       | Typical day     | Sitting                                                             | SenseWear              | ST             | 7 days    | N/A                     | N/A      | Left arm      |
| Lagersted-Olsen, 2014 | 40.9 (8.6)                                      | 26 (work sitting = 25, leisure time on workday = 26, leisure day = 26) | 14                              | 12                               | Denmark, NR                                                                                             | Office workers                                   | New questions - unnamed but based on IPAQ and MOSPAQ | Multi                           | Quest.       | Past 7 days     | Occup. sitting                                                      | ActiGraph GT3X+        | ST at work     | 7 days    | N/A - used inclinometer | N/A      | Right thigh   |
| Larsson, 2019         | Validity = 42.9 (8.9), reliability = 70.3 (5.0) | Validity = 284, reliability = 95                                       | Validity = 95, reliability = 29 | Validity = 188, reliability = 66 | Sweden, Validity = Physical Activity and Healthy Brain Functions, reliability = Health Project at GIH   | Validity = office workers, reliability = seniors | SED-GIH                                              | Single                          | Quest.       | Normal day      | Sitting                                                             | activPAL3 micro        | Sitting/lying  | 7 days    | N/A                     | N/A      | Right thigh   |

| First Author, year    | Age range or mean (SD)                                     | N analyzed (%)                                  |                                                |                                                   | Country, Study name    | Population                                          | Self-report measure                |                                    |              |                                 |                | Device measure   |                |           |           |          |               |
|-----------------------|------------------------------------------------------------|-------------------------------------------------|------------------------------------------------|---------------------------------------------------|------------------------|-----------------------------------------------------|------------------------------------|------------------------------------|--------------|---------------------------------|----------------|------------------|----------------|-----------|-----------|----------|---------------|
|                       |                                                            | Total                                           | Men                                            | Women                                             |                        |                                                     | Name                               | Multi-item or single               | Measure type | Recall period*                  | Domain or type | Name             | Domain or type | Wear time | Cut-point | Axis     | Wear location |
| Legge, 2017           | SLE = 43.9 (12.5), RA = 51.5 (13.4), control = 50.9 (11.2) | SLE = 20, arthritis = 19, healthy controls = 20 | SLE = 2 (10%), RA = 8 (42%), Control = 7 (35%) | SLE = 18 (90%), RA = 11 (58%), control = 13 (65%) | Canada, NR             | Patients with systemic lupus erythematosus          | Framingham Physical Activity Index | Single (working and leisure hours) | Quest.       | Unclear                         | SBs            | ActiGraph GT3X+  | ST             | 7 days    | < 100 cpm | NR       | Waist         |
| Lewis, 2016           | Men: 65.4 (5.7); Women: 72.4 (6)                           | 27                                              | 10                                             | 17                                                | Australia, Small Steps | Older adults                                        | MARCA                              | Multi                              | Quest.       | Previous day                    | SBs            | activPAL3        | Sitting time   | 7 days    | N/A       | N/A      | Thigh         |
| Lewis, 2018           | 67.9 (6.6)                                                 | 52                                              | 32                                             | 20                                                | UK, NR                 | Older cancer survivors and adults at risk of cancer | IPAQ-LF (sitting questions only)   | Single (weekday + weekend day)     | Quest.       | Past 7 days                     | Sitting        | ActiGraph GT3X   | ST             | 7 days    | < 100 cpm | VM       | Right hip     |
| Libertine, 2011       | 45.6 (11.28)                                               | 19                                              | NR                                             | NR                                                | USA, NR                | Overweight and obese office workers                 | Sitting Quest.                     | NR                                 | Quest.       | NR                              | Sitting        | activPAL         | Sitting/lying  | 2 weeks   | N/A       | N/A      | NR            |
|                       |                                                            |                                                 |                                                |                                                   |                        |                                                     | Focus Quest.                       |                                    |              |                                 |                |                  |                |           |           |          |               |
| Lopez-Rodriguez, 2017 | 71.96 (5.48)                                               | 73                                              | 11                                             | 62                                                | Spain, NR              | Healthy elderly                                     | EXERNET Quest.                     | Single sedentary question          | Quest.       | Past 7 days                     | Sitting        | ActiGraph GT1M   | ST             | 7 days    | ≤ 100 cpm | Vertical | Right hip     |
| Loprinzi, 2013        | 21.4 (2.1)                                                 | 87 (78 accelerometer)                           | 58.6%                                          | 41.3%                                             | USA, NR                | Healthy young adults                                | SBQ                                | Multi                              | Quest.       | Typical weekday and weekend day | ST             | ActiGraph GT1M   | ST             | 7 days    | < 100 cpm | Vertical | Right hip     |
| Lucas, 2013           | NR                                                         | 60                                              | 37%                                            | 63%                                               | USA, NR                | College freshmen                                    | IPAQ-LF (sitting questions only)   | Single (weekday + weekend day)     | Quest.       | Last 7 days                     | Sitting        | activPAL         | Sitting/lying  | 7 days    | N/A       | N/A      | NR            |
| Mader, 2006           | Validation men = 57.6 (14.4), women =                      | Validity = 35, reliability = 178                | Validation = 22, reliability = 101             | Validation = 13, reliability = 77                 | Switzerland, NR        | Middle-aged women & men                             | IPAQ-SF                            | Single                             | Quest.       | Last 7 days                     | Sitting        | ActiGraph AM7164 | ST             | 7 days    | < 100 cpm | Vertical | Hip           |

| First Author, year | Age range or mean (SD)                                          | N analyzed (%) |                                 |                                  | Country, Study name | Population                      | Self-report measure                              |                      |              |                                 |                                                                                                                                                               | Device measure  |                |           |           |          |               |
|--------------------|-----------------------------------------------------------------|----------------|---------------------------------|----------------------------------|---------------------|---------------------------------|--------------------------------------------------|----------------------|--------------|---------------------------------|---------------------------------------------------------------------------------------------------------------------------------------------------------------|-----------------|----------------|-----------|-----------|----------|---------------|
|                    |                                                                 | Total          | Men                             | Women                            |                     |                                 | Name                                             | Multi-item or single | Measure type | Recall period*                  | Domain or type                                                                                                                                                | Name            | Domain or type | Wear time | Cut-point | Axis     | Wear location |
|                    | 49.7 (14.0). Reliability men = 46.8 (13.2), women = 46.1 (14.8) |                |                                 |                                  |                     |                                 |                                                  |                      |              |                                 |                                                                                                                                                               |                 |                |           |           |          |               |
| Maier, 2017        | 74.2 (8.2)                                                      | 100            | 33                              | 67                               | USA, NR             | Community-dwelling older adults | Daily diary                                      | N/A                  | Diary        | Current day                     | Sitting/lying                                                                                                                                                 | activPAL        | Sitting/lying  | 14 days   | N/A       | N/A      | Thigh         |
| Marmeleira, 2013   | 47.7 (11.3)                                                     | 58             | 37                              | 21                               | Portugal, NR        | Adults who are blind            | IPAQ-SF                                          | Single               | Quest.       | Last 7 days                     | Sitting                                                                                                                                                       | ActiGraph GT1M  | ST             | 7 days    | < 100 cpm | Vertical | Right hip     |
| Marshall, 2010     | NR                                                              | Validity = 55  | Validity = 11, reliability = 96 | Validity = 44, reliability = 157 | Australia, NR       | Middle-aged women & men         | Marshall Sitting Quest.                          | Multi                | Quest.       | Usual weekday and weekend day   | Sitting (travel, work, TV, computer, leisure)                                                                                                                 | ActiGraph GT1M  | ST             | 7 days    | < 100 cpm | Vertical | NR            |
| Marshall, 2015     | 83.5 (6.5)                                                      | 230            | 69 (30%)                        | 161 (70%)                        | USA, NR             | Community-dwelling older adults | Modified SBQ                                     | Multi                | Quest.       | Typical weekday and weekend day | ST: TV, computer/internet use, reading, socializing, driving or using motorized travel, doing hobbies, office or volunteer work, napping, and other behaviors | ActiGraph GT3X+ | ST             | 7 days    | < 100 cpm | NR       | Right hip     |
| Matsuo, 2016       | men: 46.3 (8.0); women: 35.8 (7.5)                              | 62             | 36                              | 26                               | Japan, NR           | Workers                         | Workers' Sitting- and Walking-Time Quest. (WSWQ) | Multi                | Quest.       | Typical day                     | Occup. sitting, leisure sitting, non-                                                                                                                         | activPAL        | Sitting/lying  | 7 days    | N/A       | N/A      | Thigh         |

| First Author, year | Age range or mean (SD)                       | N analyzed (%)                                                                                 |                                                                                  |                                                                                                | Country, Study name                                 | Population                                 | Self-report measure                                               |                            |                               |                                            |                 | Device measure  |                             |           |           |           |               |
|--------------------|----------------------------------------------|------------------------------------------------------------------------------------------------|----------------------------------------------------------------------------------|------------------------------------------------------------------------------------------------|-----------------------------------------------------|--------------------------------------------|-------------------------------------------------------------------|----------------------------|-------------------------------|--------------------------------------------|-----------------|-----------------|-----------------------------|-----------|-----------|-----------|---------------|
|                    |                                              | Total                                                                                          | Men                                                                              | Women                                                                                          |                                                     |                                            | Name                                                              | Multi-item or single       | Measure type                  | Recall period*                             | Domain or type  | Name            | Domain or type              | Wear time | Cut-point | Axis      | Wear location |
|                    |                                              |                                                                                                |                                                                                  |                                                                                                |                                                     |                                            |                                                                   |                            |                               |                                            | workday sitting |                 |                             |           |           |           |               |
| Matsuzaki, 2016    | 35.0 (14.2)                                  | 245                                                                                            | 136 (56%)                                                                        | 109 (44%)                                                                                      | India, Hyderabad DXA Study                          | General population                         | Andhra Pradesh Children and Parent Study Physical Activity Quest. | Multi                      | Quest.                        | Last 7 days                                | Multiple SBs    | Actiheart       | ST                          | 8 days    | N/A       | N/A       | Chest         |
| Matthews, 1995     | Men: 25.5 (3.94), women: 28.2 (6.85)         | 25                                                                                             | 14                                                                               | 11                                                                                             | USA, NR                                             | University students                        | PAL                                                               | N/A                        | 3-day Log                     | Current day                                | ST              | Tritrac R3D     | ST                          | 7 days    | N/A       | Tri-axial | Right hip     |
| Matthews, 2013     | 41.3 (14.8)                                  | 88                                                                                             | 40                                                                               | 48 (53.7%)                                                                                     | USA, NR                                             | Middle-aged women & men                    | PDR                                                               | N/A                        | Quest.                        | Past day                                   | ST              | activPAL        | Sitting/lying               | 7 days    | N/A       | N/A       | Right thigh   |
|                    |                                              |                                                                                                |                                                                                  |                                                                                                |                                                     |                                            |                                                                   |                            |                               |                                            |                 | ActiGraph GT3X+ | ST                          |           |           |           | < 100 cpm     |
| Matthews, 2018     | 63.2 (5.9)                                   | activPAL = 932, AARP = 842, ACT24 = 923, ActiGraph = 924                                       | 461                                                                              | 471                                                                                            | USA, Interactive Diet and Activity Tracking in AARP | General population                         | AARP Quest., 24-hour recall (ACT24)                               | AARP = single, ACT24 = n/A | AARP = Quest., ACT24 = recall | AARP = past 12 months, ACT24 = 24-h recall | ST              | activPAL        | Sitting/lying               | 7 days    | N/A       | N/A       | Right thigh   |
|                    |                                              |                                                                                                |                                                                                  |                                                                                                |                                                     |                                            |                                                                   |                            |                               |                                            |                 | ActiGraph GT3X+ | ST                          |           |           |           | < 100 cpm     |
| Matthews, 2011     | 48.3 (12.01)                                 | 45                                                                                             | 17                                                                               | 28                                                                                             | Scotland, NR                                        | Adults with intellectual disabilities      | IPAQ-SF                                                           | Single                     | Quest.                        | Past 7 days                                | Sitting         | ActiGraph GT1M  | ST                          | 7 days    | NR        | Vertical  | NR            |
| Matton, 2007       | Employed/unemployed = 22-61, retired = 48-78 | Employed/unemployed: reliability = 66, validity = 62, retired: reliability = 36, validity = 49 | Employed/unemployed: reliability = 31, validity = 32, retired: reliability = 20, | Employed/unemployed: reliability = 35, validity = 30, retired: reliability = 16, validity = 19 | Belgium, NR                                         | Employed/unemployed adults, retired adults | FPACQ                                                             | Single                     | Quest.                        | Usual week                                 | TV              | Triaxial RT3    | TV time (overlaid from log) | 7 days    | NR        | VM        | Right hip     |

| First Author, year | Age range or mean (SD)                                                 | N analyzed (%)                                                                     |                                                      |                                                                                    | Country, Study name                                 | Population                                        | Self-report measure              |                                |              |                      |                               | Device measure         |                |           |                                      |          |                     |
|--------------------|------------------------------------------------------------------------|------------------------------------------------------------------------------------|------------------------------------------------------|------------------------------------------------------------------------------------|-----------------------------------------------------|---------------------------------------------------|----------------------------------|--------------------------------|--------------|----------------------|-------------------------------|------------------------|----------------|-----------|--------------------------------------|----------|---------------------|
|                    |                                                                        | Total                                                                              | Men                                                  | Women                                                                              |                                                     |                                                   | Name                             | Multi-item or single           | Measure type | Recall period*       | Domain or type                | Name                   | Domain or type | Wear time | Cut-point                            | Axis     | Wear location       |
|                    |                                                                        |                                                                                    | validity = 30                                        |                                                                                    |                                                     |                                                   |                                  |                                |              |                      |                               |                        |                |           |                                      |          |                     |
| Mazzoni, 2017      | 58 (11)                                                                | 42                                                                                 | 0                                                    | 42                                                                                 | Sweden, Physical Training and Cancer                | Breast cancer patients                            | Log book                         | N/A                            | Log book     | Current day          | ST                            | SenseWear Armband Mini | ST             | 7 days    | ≤ 1.5 MET                            | N/A      | Arm (right or left) |
| McNeil, 2018       | 59 (5)                                                                 | Accelerometer: high = 165, moderate = 156, self-report: high = 180, moderate = 175 | 0                                                    | Accelerometer: high = 165, moderate = 156, self-report: high = 180, moderate = 175 | Canada, Breast Cancer and Exercise Trial in Alberta | Post-menopausal women                             | SIT-Q                            | Multi                          | Quest.       | Usual past 12 months | Total, occup. and leisure ST  | ActiGraph GT3X+        | ST             | 7 days    | < 100 cpm                            | Vertical | Waist               |
| Melville, 2011     | 48.3 (12.01)                                                           | Accelerometer = 45, IPAQ = 47                                                      | NR                                                   | NR                                                                                 | Scotland, TAKE5 intervention                        | Adults with intellectual disabilities and obesity | IPAQ-SF                          | Single                         | Quest.       | Last 7 days          | Sitting                       | ActiGraph GT1M         | ST             | 7 days    | < 500 cpm                            | Vertical | Hip                 |
| Menezes, 2017      | 43.22 (13.9)                                                           | 49                                                                                 | 17                                                   | 32                                                                                 | Portugal, NR                                        | People who are deaf                               | IPAQ-SF                          | Single                         | Quest.       | Last 7 days          | Sitting                       | ActiGraph GT1M         | ST             | 7 days    | < 100 cpm                            | Vertical | Right hip           |
| Mensah, 2016       | 40.5 (14.3)                                                            | 88 (total validity), 82 (domain validity), 32 (reliability)                        | 45                                                   | 51                                                                                 | France, NR                                          | Healthy general population                        | STAQ                             | Multi                          | Quest.       | Last 4 weeks         | Total sitting: occup., travel | ActiGraph GT3X+        | ST             | 7-14 days | < 150 cpm                            | NR       | Hip                 |
| Metcalf, 2018      | Training = 49.1 (14.1), testing = 50.6 (13.7), validation = 36.5 (8.1) | Training = 86, testing = 22, validation = 120                                      | Training = 32.6%, testing = 27.3%, validation = 7.5% | Training = 67.4%, testing = 72.7%, validation = 92.5%                              | USA, Active Ottumwa                                 | General population                                | GPAQ                             | Single                         | Quest.       | Past 7 days          | Sitting                       | ActiGraph GT9X         | ST             | 7 days    | Staudenmaier decision tree algorithm | N/A      | Non-dominant wrist  |
| Meyer, 2015        | 38.6 (14.0)                                                            | 24                                                                                 | 0                                                    | 24                                                                                 | USA, NR                                             | Patients with depression                          | IPAQ-LF (sitting questions only) | Single (weekday + weekend day) | Quest.       | Last 7 days          | Sitting                       | ActiGraph GT3X+        | ST             | 7 days    | < 1.5 MET S                          | VM       | Waist (either side) |

| First Author, year   | Age range or mean (SD)                                    | N analyzed (%)                                                                      |     |       | Country, Study name        | Population                            | Self-report measure                    |                                |              |                                 |                   | Device measure         |                |           |             |          |               |
|----------------------|-----------------------------------------------------------|-------------------------------------------------------------------------------------|-----|-------|----------------------------|---------------------------------------|----------------------------------------|--------------------------------|--------------|---------------------------------|-------------------|------------------------|----------------|-----------|-------------|----------|---------------|
|                      |                                                           | Total                                                                               | Men | Women |                            |                                       | Name                                   | Multi-item or single           | Measure type | Recall period*                  | Domain or type    | Name                   | Domain or type | Wear time | Cut-point   | Axis     | Wear location |
| Moran, 2016          | Assisted living: 89.2 ± 6.8, independent living: 78.9 ± 5 | 40 (20 assisted living (14 accel data), 20 independent living (18 with accel data)) | 13  | 27    | Australia, NR              | Older adults                          | IPAQ-SF                                | Single                         | Quest.       | Last 7 days                     | Sitting           | SenseWear Armband      | ST             | 7 days    | < 1.5 MET S | N/A      | Arm           |
| Moss, 2018           | 39.6 (9.1)                                                | 56                                                                                  | 28  | 28    | South Africa, NR           | People with intellectual disabilities | IPAQ-SF (proxy reported by caregivers) | Single                         | Quest.       | Last 7 days                     | Sitting           | ActiHeart              | ST             | 7 days    | < 1.5 MET S | N/A      | NR            |
| Mumu, 2017           | 35 (9)                                                    | 155                                                                                 | 74  | 88    | Bangladesh, NR             | Healthy adults                        | GPAQ                                   | Single                         | Quest.       | Usual day                       | Sitting           | ActiGraph GT3X+        | ST             | 7 days    | < 100 cpm   | Vertical | Left hip      |
| Murillo-Rabago, 2010 | 30                                                        | 43                                                                                  | 44% | 56%   | Mexico, NR                 | Healthy adults                        | IPAQ-SF & IPAQ-LF (questions NR)       | Single                         | Interview    | Last 7 days                     | Sitting           | ActiGraph GT1M         | ST             | 7 days    | NR          | Vertical | NR            |
| O'Neill, 2017        | 63 (10)                                                   | 55                                                                                  | 22  | 33    | Northern Ireland, NR       | Patients with Bronchiectasis          | IPAQ-LF (sitting questions only)       | Single (weekday + weekend day) | Quest.       | Last 7 days                     | Sitting           | ActiGraph GT3X         | ST             | 7 days    | < 100 cpm   | NR       | Dominant hip  |
| Oostdam, 2013        | 31.4 (3.9)                                                | 55                                                                                  | 0   | 55    | Netherlands, FitFor2-study | Overweight and obese pregnant women   | AQuAA                                  | Multi                          | Quest.       | Past week                       | SBs               | Actitrainer            | ST             | 4 days    | < 700 cpm   | Vertical | Waist         |
| Otten, 2010          | 41.4 (13.0)                                               | 40                                                                                  | 32% | 68%   | USA, NR                    | Overweight and obese adults           | None                                   | Single                         | Quest.       | Average day                     | TV                | TV monitoring device   | TV time        | 3 weeks   | N/A         | N/A      | N/A           |
| Oviedo-Caro, 2018    | 32.5 (4.4)                                                | 186                                                                                 | 0   | 186   | Spain, NR                  | Pregnant women                        | SBQ                                    | Multi                          | Quest.       | Typical weekday and weekend day | SBs               | SenseWear Mini armband | ST             | 7 days    | ≤ 1.5 MET   | N/A      | Arm           |
| Oyeyemi, 2014        | 32.6 (9.9)                                                | 144                                                                                 | 86  | 58    | Nigeria, NR                | General population                    | Hausa IPAQ-SF                          | Single                         | Quest.       | Last 7 days                     | Sitting (weekday) | ActiGraph 7164         | ST             | 7 days    | < 100 cpm   | Vertical | Right hip     |



| First Author, year | Age range or mean (SD)                                | N analyzed (%)                                        |                                       |                                       | Country, Study name                                                  | Population                         | Self-report measure |                      |              |                                |                                                  | Device measure  |                                                  |                            |           |          |               |
|--------------------|-------------------------------------------------------|-------------------------------------------------------|---------------------------------------|---------------------------------------|----------------------------------------------------------------------|------------------------------------|---------------------|----------------------|--------------|--------------------------------|--------------------------------------------------|-----------------|--------------------------------------------------|----------------------------|-----------|----------|---------------|
|                    |                                                       | Total                                                 | Men                                   | Women                                 |                                                                      |                                    | Name                | Multi-item or single | Measure type | Recall period*                 | Domain or type                                   | Name            | Domain or type                                   | Wear time                  | Cut-point | Axis     | Wear location |
| Pedersen, 2016     | Validity = 45.62 (10.96), reliability = 42.87 (11.34) | Validity = 34 (cohort 1), reliability = 75 (cohort 3) | Validity = 6, reliability = 13        | Validity = 28, reliability = 62       | Australia, NR                                                        | Desk-based workers                 | OSPAQ               | Multi                | Quest.       | Typical workday in last 7 days | Occup. sitting                                   | activPAL        | Sitting                                          | 1 8-h workday              | N/A       | N/A      | Right thigh   |
| Pedusic, 2014      | >18 years                                             | Validity = 143, reliability = 96                      | Validity = 37.4%, reliability = 37.5% | Validity = 62.6%, reliability = 62.5% | Australia, NR                                                        | Desk-based workers                 | SITBRQ              | Multi                | Quest.       | Typical workday                | Duration and frequency of sitting breaks at work | ActiGraph GT1M  | Duration and frequency of sitting breaks at work | 7 days                     | < 100 cpm | Vertical | Right hip     |
| Peters, 2010       | 53.4 (9.4)                                            | 545                                                   | 271                                   | 274                                   | China, Shanghai Women's Health Study and Shanghai Men's Health Study | Urban adults                       | PYPAQ               | Multi                | Quest.       | Past year                      | SBs                                              | ActiGraph 7164  | ST                                               | 7 days                     | < 100 cpm | Vertical | Left hip      |
| Pinto, 2017        | 55.62 (9.55)                                          | 76                                                    | 0                                     | 76                                    | USA, NR                                                              | Breast cancer survivors            | 7-d PAR             | N/A                  | Daily recall | Previous 7 days                | Sitting                                          | ActiGraph GT3X  | ST                                               | 7 days                     | < 100 cpm | NR       | NR            |
| Powell, 2011       | 39                                                    | 41                                                    | NR                                    | NR                                    | USA, NR                                                              | Overweight/obese Latina immigrants | GPAQ                | Single               | Quest.       | Typical day                    | Sitting                                          | NR              | ST                                               | 3 week days, 1 weekend day | NR        | Vertical | NR            |
| Prince, 2018       | 43 (12)                                               | 313                                                   | 16 (5%)                               | 297 (95%)                             | Canada, Champlain Nurses' Study                                      | Nurses                             | IPAQ-SF             | Single               | Quest.       | Last 7 days                    | Sitting                                          | ActiGraph GT3X+ | ST                                               | 7 days                     | < 150 cpm | VM       | Right hip     |
|                    |                                                       |                                                       |                                       |                                       |                                                                      |                                    | SBQ                 | Multi                |              | Usual weekday and weekend day  | SBs                                              |                 |                                                  |                            |           |          |               |
| Prince, 2019       | 61.5 (9.8)                                            | 35                                                    | 19                                    | 16                                    | Canada, SIT-CR study                                                 | Cardiac rehabilitation patients    | IPAQ-SF             | Single               | Quest.       | Last 7 days                    | Sitting                                          | activPAL3       | Sitting + lying                                  | 7 days                     | N/A       | N/A      | Right thigh   |

| First Author, year | Age range or mean (SD)                                                   | N analyzed (%)                    |                                 |                                 | Country, Study name                              | Population                             | Self-report measure                              |                                |              |                                  |                | Device measure  |                |           |           |           |                  |
|--------------------|--------------------------------------------------------------------------|-----------------------------------|---------------------------------|---------------------------------|--------------------------------------------------|----------------------------------------|--------------------------------------------------|--------------------------------|--------------|----------------------------------|----------------|-----------------|----------------|-----------|-----------|-----------|------------------|
|                    |                                                                          | Total                             | Men                             | Women                           |                                                  |                                        | Name                                             | Multi-item or single           | Measure type | Recall period*                   | Domain or type | Name            | Domain or type | Wear time | Cut-point | Axis      | Wear location    |
| Rees-Punia, 2019   | 51.7 (range: 31-72)                                                      | 713                               | 290                             | 423                             | USA, Cancer Prevention 3 Study                   | General population                     | 7-day diary                                      | N/A                            | Diary        | Current day                      | Sitting        | ActiGraph GT3X  | ST             | 7 days    | NR        | Tri-axial | Non-dominant hip |
|                    |                                                                          |                                   |                                 |                                 |                                                  |                                        | Sitting Quest.                                   | Multi                          | Quest.       | Past year typical day            |                |                 |                |           |           |           |                  |
| Riviere, 2018      | 30.1 (10.7)                                                              | 87                                | NR                              | NR                              | France, NR                                       | General population                     | GPAQ (French version)                            | Single                         | Quest.       | Usual day                        | Sitting        | ActiGraph GT3X  | ST             | 7 days    | NR        | NR        | Waist            |
|                    |                                                                          |                                   |                                 |                                 |                                                  |                                        | IPAQ-LF (French version, sitting questions only) |                                |              | Single (weekday and weekend day) |                |                 |                |           |           |           |                  |
| Roman-Vinas, 2010  | 43.2 (14.1)                                                              | Validity = 54, reliability = 66   | Validity = 23, reliability = 27 | Validity = 31, reliability = 39 | Spain, NR                                        | General population                     | IPAQ-LF (sitting questions only)                 | Single (weekday + weekend day) | Quest.       | Last 7 days                      | Sitting        | ActiGraph MTI   | ST             | 7 days    | <101 cpm  | Vertical  | Waist            |
| Rosenberg, 2010    | Validity: women = 41.2 (8.7), men = 43.9 (8.0), Reliability = 20.4 (1.3) | Validity = 842, reliability = 49  | Validity = 441                  | Validity = 401                  | USA, NR                                          | Validity = overweight men & women      | SBQ                                              | Multi                          | Quest.       | Usual weekday and weekend day    | SBs            | ActiGraph 7164  | ST             | 7 days    | < 100 cpm | Vertical  | Right hip        |
| Rosenberg, 2016    | 83.6 (6.4)                                                               | 307, self-report: 280, accel: 302 | 123                             | 222                             | USA, NR                                          | Older adults in retirement communities | SBQ                                              | Multi                          | Quest.       | Usual weekday and weekend day    | SBs            | ActiGraph GT3X  | ST             | 6 days    | < 100 cpm | NR        | Right hip        |
| Rosenberg, 2015    | 71.4 (6.4)                                                               | 23 (ActiGraph 22)                 | 30%                             | 70%                             | USA, Take Active Breaks from Sitting Pilot Study | Overweight and obese older adults      | IPAQ-LF (sitting questions only)                 | Single (weekday + weekend day) | Quest.       | Last 7 days                      | Sitting        | activPAL        | Sitting/lying  | 7 days    | N/A       | N/A       | Thigh            |
|                    |                                                                          |                                   |                                 |                                 |                                                  |                                        |                                                  |                                |              |                                  |                | ActiGraph GT3X+ | ST             |           |           |           |                  |
| Ruiz-Casado, 2016  | 54 (11)                                                                  | 177                               | 36%                             | 64%                             | Spain, NR                                        | Spanish cancer survivors               | IPAQ-SF                                          | Single                         | Quest.       | Last 7 days                      | Sitting        | ActiGraph GT3X  | ST             | 5-10 days | < 100 cpm | NR        | NR               |
|                    |                                                                          |                                   |                                 |                                 |                                                  |                                        | GPAQ                                             |                                |              | Typical day                      |                |                 |                |           |           |           |                  |

| First Author, year | Age range or mean (SD)                                                                                        | N analyzed (%)                                                                       |                                                                                          |                                                                                          | Country, Study name                | Population                      | Self-report measure                       |                                        |              |                               |                                                                                     | Device measure     |                |                         |           |           |               |
|--------------------|---------------------------------------------------------------------------------------------------------------|--------------------------------------------------------------------------------------|------------------------------------------------------------------------------------------|------------------------------------------------------------------------------------------|------------------------------------|---------------------------------|-------------------------------------------|----------------------------------------|--------------|-------------------------------|-------------------------------------------------------------------------------------|--------------------|----------------|-------------------------|-----------|-----------|---------------|
|                    |                                                                                                               | Total                                                                                | Men                                                                                      | Women                                                                                    |                                    |                                 | Name                                      | Multi-item or single                   | Measure type | Recall period*                | Domain or type                                                                      | Name               | Domain or type | Wear time               | Cut-point | Axis      | Wear location |
| Ruiz-Casado, 2015  | 18-65                                                                                                         | 139                                                                                  | NR                                                                                       | NR                                                                                       | Spain, NR                          | Spanish cancer survivors        | IPAQ-SF                                   | Single                                 | Quest.       | Last 7 days                   | Sitting                                                                             | ActiGraph GT3X     | ST             | 3 week days, 2 week end | NR        | NR        | NR            |
| Ryan, 2014         | Middle-aged: included = 54.7 (5.8), excluded = 54.2 (5.7), older/included = 73.8 (6.5), excluded = 75.8 (7.7) | Middle-aged/included = 3332, excluded = 1694, older/included = 2022, excluded = 1449 | Middle-aged/included = 45.4%, excluded = 45.6%, older/included = 46.3%, excluded = 40.6% | Middle-aged/included = 54.6%, excluded = 54.4%, older/included = 53.7%, excluded = 59.4% | England, Health Survey for England | General population              | Health Survey for England                 | Single (week day and weekend)          | Quest.       | NR                            | Sitting                                                                             | ActiGraph GT1M     | ST             | 1 week                  | NR        | Vertical  | NR            |
| Ryan, 2018         | 73.7 ± 6.3 years                                                                                              | Reliability = 73, validity = 86                                                      | Reliability = 41                                                                         | Reliability = 48                                                                         | England, NR                        | Community dwelling older adults | IPAQ-LF (sitting and sitting + motorized) | Single (week day + weekend day), multi | Quest.       | Last 7 days                   | Sitting with and without motorized transport                                        | GeneActiv Original | ST             | 7 days                  | NR        | Tri-axial | Thigh         |
| Ryde, 2017         | 56.5 (17.7)                                                                                                   | Self-report = 90, accelerometer = 29                                                 | 0                                                                                        | Self-report = 90, accelerometer = 29                                                     | Scotland, Well!Bingo project       | Women attending Bingo club      | Marshall Sitting Quest.                   | Multi                                  | Quest.       | Previous week                 | Total sitting: travel + work + TV + home computer use + leisure time (excluding TV) | ActiGraph GT3X     | ST             | 7 days                  | < 100 cpm | Vertical  | Waist         |
| Sasaki, 2018       | 56.6 (7.3)                                                                                                    | 63                                                                                   | 15                                                                                       | 48                                                                                       | USA, NR                            | People with Multiple Sclerosis  | Marshall Sitting Quest.                   | Multi                                  | Quest.       | Usual weekday and weekend day | Total sitting: travel + work + TV + home computer use + leisure time                | ActiGraph GT3X     | ST             | 7 days                  | < 100 cpm | NR        | Right hip     |

| First Author, year   | Age range or mean (SD) | N analyzed (%)                                                  |     |                                                                 | Country, Study name                                      | Population                                | Self-report measure                                                     |                                                        |               |                                        |                                                                                                         | Device measure  |                |                                      |           |         |               |
|----------------------|------------------------|-----------------------------------------------------------------|-----|-----------------------------------------------------------------|----------------------------------------------------------|-------------------------------------------|-------------------------------------------------------------------------|--------------------------------------------------------|---------------|----------------------------------------|---------------------------------------------------------------------------------------------------------|-----------------|----------------|--------------------------------------|-----------|---------|---------------|
|                      |                        | Total                                                           | Men | Women                                                           |                                                          |                                           | Name                                                                    | Multi-item or single                                   | Measure type  | Recall period*                         | Domain or type                                                                                          | Name            | Domain or type | Wear time                            | Cut-point | Axis    | Wear location |
|                      |                        |                                                                 |     |                                                                 |                                                          |                                           |                                                                         |                                                        |               |                                        | (excluding TV)                                                                                          |                 |                |                                      |           |         |               |
| Schaller, 2016       | 30.7 (15.3)            | 78: low back patients = 27, healthy controls = 53               | 47  | 31                                                              | Germany, Movement Coaching study and the Make Move study | Low back pain patients & healthy controls | GPAQ                                                                    | Single                                                 | Quest.        | Last 7 days                            | Sitting                                                                                                 | ActiGraph GT3X  | ST             | 7 days                               | < 100 cpm | NR      | Right waist   |
| Scheers, 2012        | 41.4 (9.8)             | Valid SenseWear = 405, SWD = 383                                | 212 | 230                                                             | Belgium, NR                                              | Workers                                   | FPACQ                                                                   | Multi                                                  | Quest.        | Usual week                             | Sitting                                                                                                 | SenseWear Pro 3 | ST             | 7 days                               | N/A       | N/A     | Right arm     |
| Segura-Jimenez, 2013 | 51.1 (8.2)             | Validity = 123, reliability = 183                               | 0   | Validity = 123, reliability = 183                               | Spain, the Andalus project                               | Women with fibromyalgia                   | Modified IPAQ-LF (Spanish, sitting/lying and sitting/lying + motorized) | Multi: sitting (weekd ay + weeken d + transpo rtation) | Quest.        | Last 7 days                            | Sitting/lying, Sitting + travel                                                                         | SenseWear Pro 3 | ST             | 7 days (9 remove first and last day) | < 3 MET S | Biaxial | Arm           |
| Shadyab, 2017        | 79.2 (6.7)             | Accelerometer-measured (n = 1,297) or self reported (n = 1,383) | 0   | Accelerometer-measured (n = 1,297) or self reported (n = 1,383) | USA, Women's Health Initiative                           | Older women                               | No name                                                                 | Multi                                                  | Quest.        | Usual day                              | ST (sitting + lying)                                                                                    | ActiGraph GT3X  | ST             | 7 days                               | ≤ 72 cpm  | VM      | Right hip     |
| Shuval, 2014         | 40-79                  | 151                                                             | NR  | NR                                                              | USA, Rapid Assessment Disuse Index (RADI) study          | Primary care patients                     | Rapid Assessment Disuse Index (RADI)                                    | Single                                                 | Matrix Quest. | Past week/<br>Past Month/<br>Past Year | Sitting: at home/<br>work,<br>TV/video/<br>DVDs,<br>computer at home/<br>work,<br>eating meals,<br>etc. | ActiGraph GT3X  | ST             | 7 days                               | < 100 cpm | NR      | Right hip     |

| First Author, year   | Age range or mean (SD)                               | N analyzed (%)                     |                                   |                                   | Country, Study name                               | Population                         | Self-report measure             |                      |              |                           |                 | Device measure            |                |           |            |          |                  |
|----------------------|------------------------------------------------------|------------------------------------|-----------------------------------|-----------------------------------|---------------------------------------------------|------------------------------------|---------------------------------|----------------------|--------------|---------------------------|-----------------|---------------------------|----------------|-----------|------------|----------|------------------|
|                      |                                                      | Total                              | Men                               | Women                             |                                                   |                                    | Name                            | Multi-item or single | Measure type | Recall period*            | Domain or type  | Name                      | Domain or type | Wear time | Cut-point  | Axis     | Wear location    |
| Simpson, 2015        | Validity = 44.1 (16.1), reliability = 44.7 (16.3)    | Validity = 419, reliability = 217  | Validity = 206, reliability = 106 | Validity = 213, reliability = 111 | USA, The Effects of Statins on Muscle Performance | Healthy adults                     | Question 8 of the PPAQ          | Multi                | Quest.       | Typical day               | Sitting         | Actical                   | ST             | 4 days    | NR         | Omni     | Dominant hip     |
| Stolberg, 2018       | 42.3 (9.1)                                           | 60                                 | 18                                | 42                                | Denmark, NR                                       | Patients undergoing gastric bypass | Recent Physical Activity Quest. | Multi                | Quest.       | Previous 4 weeks          | SBs             | ActiGraph GT3X            | ST             | 7 days    | < 100 cpm  | Vertical | Hip              |
| Sudholz, 2018        | 32.1 (9.9)                                           | ActivPAL = 52, ActiGraph = 49      | ActivPAL = 30, ActiGraph = 20     | ActivPAL = 22, ActiGraph = 29     | Australia, NR                                     | Workers                            | None                            | Single               | Quest.       | Previous 7 days           | Sitting at work | activPAL + log book       | Sitting time   | 8 days    | N/A        | N/A      | Left thigh       |
|                      |                                                      |                                    |                                   |                                   |                                                   |                                    |                                 |                      |              |                           |                 | ActiGraph GT3X + log book | ST at work     |           | < 100 cpm  | NR       | Right hip        |
| Sushames, 2015       | Indigenous: 35.6 (10.9), non-Indigenous: 32.9 (11.5) | Indigenous: 61, non-Indigenous: 36 | NR                                | NR                                | Australia, NR                                     | Indigenous Australians             | Past Day Adults' ST Quest.      | Multi                | Quest.       | Previous day              | SBs             | ActiGraph GT3X            | ST             | 7 days    | < 100 cpm  | NR       | Hip              |
| Sweatt, 2015         | 36.6 (7.8)                                           | 44                                 | 0                                 | 44                                | USA, NR                                           | Latina Immigrants                  | GPAQ                            | Single               | Quest.       | Typical week              | Sitting         | ActiGraph MTI             | ST             | 4 days    | NR         | Vertical | Right hip        |
| Terada, 2015         | Men: 22.3 (1.8), women: 21.6 (1.0)                   | 19                                 | 11                                | 8                                 | Canada, NR                                        | General population                 | Activity Log Diary              | N/A                  | Diary        | Current day               | SBs             | SenseWear Pro 3           | ST             | 3 days    | ≤ 1.5 METS | N/A      | Right arm        |
| Toledo, 2017         | 49.0 (8.9)                                           | 28                                 | 85%                               | 15%                               | USA, NR                                           | US veterans & university employees | BeWell24 App                    | N/A                  | EMA          | 5-minute recall           | SBs             | activPAL3                 | Sitting/lying  | 7 days    | N/A        | N/A      | Right thigh      |
| Umstattt Meyer, 2013 | 44.6 (10.9)                                          | 87                                 | 22                                | 78%                               | USA, NR                                           | Free living adults                 | IPAQ (version NR)               | Single               | Quest.       | Last 7 days               | Sitting         | ActiGraph GT1M            | ST             | 7 days    | < 100 cpm  | Vertical | Non-dominant hip |
| Unick, 2017          | 27.7 (4.4)                                           | 595                                | 22%                               | 78%                               | USA, Study of Novel Approaches to Weight Gain     | Young adults                       | SBQ                             | Multi                | Quest.       | Usual weekday and weekend | SBs             | SenseWear Armband         | ST             | 7 days    | < 1.5 METs | Biaxial  | Arm              |

| First Author, year   | Age range or mean (SD) | N analyzed (%)                    |       |       | Country, Study name | Population               | Self-report measure                                  |                      |                    |                                                    |                                                                                                                                                                                                         | Device measure |                |           |           |          |               |  |
|----------------------|------------------------|-----------------------------------|-------|-------|---------------------|--------------------------|------------------------------------------------------|----------------------|--------------------|----------------------------------------------------|---------------------------------------------------------------------------------------------------------------------------------------------------------------------------------------------------------|----------------|----------------|-----------|-----------|----------|---------------|--|
|                      |                        | Total                             | Men   | Women |                     |                          | Name                                                 | Multi-item or single | Measure type       | Recall period*                                     | Domain or type                                                                                                                                                                                          | Name           | Domain or type | Wear time | Cut-point | Axis     | Wear location |  |
|                      |                        |                                   |       |       | Prevention trial    |                          |                                                      |                      |                    |                                                    |                                                                                                                                                                                                         |                |                |           |           |          |               |  |
| Urda, 2017           | 48 (10)                | 44                                | 0     | 44    | USA, NR             | Office workers           | PPAQ                                                 | Multi                | Quest.             | Typical weekday and weekend day in previous 7 days | Total ST (sitting/lying/sleeping)                                                                                                                                                                       | activPAL3      | Sitting/lying  | 7 days    | N/A       | N/A      | Thigh         |  |
|                      |                        |                                   |       |       |                     |                          | OSPAQ                                                | Multi                | Quest.             | Previous 7 days                                    | Occup. sitting                                                                                                                                                                                          |                |                |           |           |          |               |  |
| Van Cauwenberg, 2014 | 74.2 (6.2)             | Validity = 442, reliability = 28  | 45.2% | 54.8% | Belgium, NR         | Free-living older adults | NR                                                   | Multi                | Quest.             | Last 7 days                                        | ST: TV, computer, reading, hobbies, seated conversation, listening to music, telephone use, public transport, driving a car, being passenger in a car, sitting during household chores, resting, eating | ActiGraph GT3X | ST             | 7 days    | < 100 cpm | NR       | Right hip     |  |
| Van Der Ploeg, 2010  | ≥18                    | Reliability = 134, validity = 129 | 79    | 55    | Australia, NR       | Workers                  | 2006 Australian Bureau of Statistics time use survey | N/A                  | Time use diary     | Current day                                        | SBs                                                                                                                                                                                                     | ActiGraph GT1M | ST             | 10 days   | < 100 cpm | Vertical | Right hip     |  |
| Van Dyck, 2015       | 43.5 (12.3)            | 542                               | 45.2% | 54.8% | Belgium, BEPAS      | General population       | IPAQ-LF (sitting)                                    | Single (weekday +    | Quest. (interview) | Last 7 days                                        | Sitting                                                                                                                                                                                                 | ActiGraph 7164 | ST             | 7 days    | < 100 cpm | Vertical | Right hip     |  |

| First Author, year | Age range or mean (SD) | N analyzed (%)                    |            |             | Country, Study name                             | Population                             | Self-report measure              |                                                 |                |                                                 |                               | Device measure         |                 |                              |           |          |               |
|--------------------|------------------------|-----------------------------------|------------|-------------|-------------------------------------------------|----------------------------------------|----------------------------------|-------------------------------------------------|----------------|-------------------------------------------------|-------------------------------|------------------------|-----------------|------------------------------|-----------|----------|---------------|
|                    |                        | Total                             | Men        | Women       |                                                 |                                        | Name                             | Multi-item or single                            | Measure type   | Recall period*                                  | Domain or type                | Name                   | Domain or type  | Wear time                    | Cut-point | Axis     | Wear location |
|                    |                        |                                   |            |             |                                                 |                                        | questions only)                  | weekend day)                                    |                |                                                 |                               |                        |                 |                              |           |          |               |
| Van Dyck, 2010     | 42.7 (12.6)            | 1200                              | 47.9%      | 52.1%       | Belgium, BEPAS                                  | General population                     | IPAQ-LF (sitting questions only) | Single (weekday + weekend day)                  | Quest.         | Last 7 days                                     | Sitting                       | ActiGraph 7164         | ST              | 7 days                       | < 100 cpm | Vertical | Right hip     |
| van Nassau, 2015   | 38 (11)                | 34, ActiGraph = 34, activPAL = 35 | NR         | 36 (86%)    | Australia, Stand@work trial                     | Health agency employees                | OSPAQ                            | Multi                                           | Quest.         | Average workday and non-work day on last 7 days | Workplace sitting             | activPAL3              | Sitting at work | Work time during 1 work week | N/A       | N/A      | Thigh         |
|                    |                        | 33, ActiGraph=34, ActivPAL = 35   |            |             |                                                 |                                        | WSQ                              | Single                                          |                | Typical workday in last 7 days                  | Occup. sitting                | ActiGraph GT1M & GT3X  | ST at work      |                              | < 100 cpm | Vertical | Right hip     |
| Vandezande, 2014   | 41.2 (10.9)            | 298                               | 70 (23.5%) | 228 (76.5%) | USA, NR                                         | Overweight and obese adults            | SB Quest.                        | Multi                                           | Quest.         | Typical weekday and weekend                     | Sum of SBs                    | ActiGraph              | ST              | 7 days                       | < 100 cpm | NR       | Right hip     |
| Vandoni, 2017      | median = 18            | 30                                | 24         | 6           | Italy, NR                                       | High school students (median age = 18) | IPAQ-LF (sitting questions only) | Multi (week day + weekend day sitting incl. TV) | Quest.         | Last 7 days                                     | Sitting                       | ActiHeart              | ST              | 5 days                       | < 100 cpm | Omni     | NR            |
| Vanroy, 2014       | 68 (11)                | 16                                | 9 (56.2%)  | 7 (43.8%)   | Belgium, NR                                     | Stroke patients                        | Activity Diary                   | N/A                                             | Activity Diary | Current day                                     | SBs (≤ 1 MET)                 | SenseWear Pro2 Armband | ST              | 1 day                        | N/A       | N/A      | Right arm     |
| Veitch, 2018       | NR                     | 64                                | NR         | NR          | Australia, NR                                   | Orthopedic trauma patients             | IPAQ (version NR)                | Single                                          | Quest.         | Last 7 days                                     | Sitting                       | activPAL               | Sitting         | 10 days                      | N/A       | N/A      | NR            |
|                    |                        |                                   |            |             |                                                 |                                        | AusDiab3                         | Multi                                           |                | Past 7 days                                     | SB                            |                        |                 |                              |           |          |               |
| Visser, 2013       | 65-92, 74.3 (6.9)      | validity = 83, reliability = 63   | 50.6%      | 49.4%       | Netherlands, Longitudinal Aging Study Amsterdam | Older adults                           | LASA SB Quest.                   | Multi                                           | Quest.         | Usual weekday and                               | Sum of SBs: napping, reading, | ActiGraph GT3X         | ST              | 8 days                       | <100 cpm  | NR       | Waist         |

| First Author, year | Age range or mean (SD)   | N analyzed (%)                     |             |                                    | Country, Study name                                                                   | Population         | Self-report measure                     |                                                           |              |                         |                                                                                   | Device measure |                |           |           |                   |               |
|--------------------|--------------------------|------------------------------------|-------------|------------------------------------|---------------------------------------------------------------------------------------|--------------------|-----------------------------------------|-----------------------------------------------------------|--------------|-------------------------|-----------------------------------------------------------------------------------|----------------|----------------|-----------|-----------|-------------------|---------------|
|                    |                          | Total                              | Men         | Women                              |                                                                                       |                    | Name                                    | Multi-item or single                                      | Measure type | Recall period*          | Domain or type                                                                    | Name           | Domain or type | Wear time | Cut-point | Axis              | Wear location |
|                    |                          |                                    |             |                                    |                                                                                       |                    |                                         |                                                           |              | weekend day             | listening to music, TV, computer, working, hobby, talking, travel, church/theater |                |                |           |           |                   |               |
| Wanner, 2017       | 47.0 (15.0)              | 354                                | 175         | 179                                | Switzerland, Swiss Food Panel                                                         | General population | GPAQ (German, French, Italian versions) | Single                                                    | Quest.       | Usual day, typical week | Sitting                                                                           | ActiGraph GT3X | ST             | 7 days    | < 100 cpm | NR                | Right hip     |
| Wanner, 2016       | 18+ Mean = 54.6, SD = NR | 346                                | 157 (45.4%) | 189 (54.6%)                        | Switzerland, Swiss Cohort Study on Air Pollution and Lung and Heart Disease in Adults | General population | IPAQ-LF (sitting + motorized))          | Multi (weekd ay + weekend day sitting + motorized travel) | Quest.       | Last 7 days             | Sitting + motorized transport                                                     | ActiGraph GT3X | ST             | 8 days    | < 150 cpm | NR (suspected VM) | Right hip     |
| Waters, 2016       | 43 ± 9                   | 37                                 | 16          | 24                                 | Singapore, SB in Business School Employees study                                      | Office workers     | SB in Business School Employees Quest.  | Multi                                                     | Quest.       | Typical day             | Sum of SBs: work, transport, leisure including TV, napping, eating, online, other | ActiGraph GT3X | ST             | 1 week    | < 150 cpm | Vertical          | Right hip     |
| Watson, 2017       | 29.5 (5.7)               | 95 (accelerometer = 89, GPAQ = 91) | 0           | 95 (accelerometer = 89, GPAQ = 91) | South Africa, Soweto First 1000 Days Cohort                                           | Pregnant women     | GPAQ                                    | Single                                                    | Quest.       | Typical day             | Sitting                                                                           | ActiGraph GT3X | ST             | 7 days    | < 100 cpm | NR                | Right hip     |
| Welch, 2018        | 56.8 (9.2)               | 414                                | 0           | 414                                | USA, NR                                                                               |                    | IPAQ-LF (sitting)                       | Single (weekd ay +                                        | Quest.       | Last 7 days             | Sitting                                                                           | ActiGraph GT1M | ST             | 7 days    | < 100 cpm | Vertical          | Right hip     |



| First Author, year | Age range or mean (SD) | N analyzed (%)                                            |               |               | Country, Study name                            | Population                    | Self-report measure              |                      |              |                                        |                                                                    | Device measure            |                |                            |                                |          |               |     |
|--------------------|------------------------|-----------------------------------------------------------|---------------|---------------|------------------------------------------------|-------------------------------|----------------------------------|----------------------|--------------|----------------------------------------|--------------------------------------------------------------------|---------------------------|----------------|----------------------------|--------------------------------|----------|---------------|-----|
|                    |                        | Total                                                     | Men           | Women         |                                                |                               | Name                             | Multi-item or single | Measure type | Recall period*                         | Domain or type                                                     | Name                      | Domain or type | Wear time                  | Cut-point                      | Axis     | Wear location |     |
|                    |                        |                                                           |               |               |                                                | Breast cancer survivors       | questions only)                  | weekend day)         |              |                                        |                                                                    |                           |                |                            |                                |          |               |     |
|                    |                        |                                                           |               |               |                                                |                               | Sitting Time Quest.              | Multi                |              |                                        |                                                                    | Sum of SBs                |                |                            |                                |          |               |     |
| Whitfield, 2013    | 34.7 (7.7)             | MSTQ = 25, Accelerometer = 21 (workday), 16 (non-workday) | 44%           | 56%           | USA, NR                                        | Recreational runners          | Multicontext Sitting Time Quest. | Multi                | Quest.       | Usual week (work day and non-work day) | Weekend & week day sitting across contexts                         | ActiGraph GT1M            | ST             | 1 work day, 1 non-work day | < 100 cpm                      | Vertical | Right hip     |     |
| Wick, 2016         | 40.8 (11.4)            | 38                                                        | 8             | 30            | Switzerland, NR                                | Office workers                | OSPAQ                            | Multi                | Quest.       | Last 7 days                            | Occup. sitting                                                     | ActiGraph GT3X + work log | ST             | 1 work week                | Sitting time from inclinometer | N/A      | Right thigh   |     |
| Wijndaele, 2014    | Sample 1: 39.4 (11.1)  | Validity: 49 (total ST), reliability: 48 (total ST)       | Validity: 41% | Validity: 59% | Belgium, NR                                    | General population            | SIT-Q-7d                         | Multi                | Quest.       | Last 7 days                            | Sitting: meals, travel, occup. nonoccup. screen time, and other ST | activPAL3                 | Sitting        | 7 days                     | N/A                            | N/A      | Thigh         |     |
|                    | Sample 2: 49.6 (7.3)   | Validity: 402, reliability: 237 (total ST)                | Validity: 193 | Validity: 209 | UK, NR                                         |                               |                                  |                      |              |                                        |                                                                    | Actiheart                 | ST             | 6 days                     |                                |          |               | N/A |
| Yi, 2014           | NR                     | 679                                                       | NR            | NR            | USA, 2011 Physical Activity and Transit Survey | General population            | Physical Activity Transit Survey | Multi                | Quest.       | NR                                     | Daytime and evening sitting                                        | NR (accelerometer)        | ST             | 7 days                     | < 100 cpm                      | NR       | NR            |     |
| Yu, 2014           | NR                     | 68                                                        | 26            | 42            | UK, NR                                         | Rheumatoid arthritis patients | IPAQ (version NR)                | Single               | Quest.       | Last 7 days                            | Sitting                                                            | ActiGraph                 | ST             | 7 days                     | NR                             | NR       | NR            |     |

AQuAA – Activity Questionnaire for Adults and Adolescents, AusDiab3 – Australian Diabetes, Obesity and Lifestyle General Questionnaire 3, AWAS – Australian Women’s Activity Survey, BEPAS – Belgian Environment and Physical Activity Study, CHAMPS – Community Health Activities Model Program for Seniors, cpm – counts-per-minute, EMA – ecological momentary assessment, FPACQ – Flemish physical activity

computerized Questionnaire, IPAQ – International Physical Activity Quest., IPAQ-LF – International Physical Activity Questionnaire-Long Form, IPAQ-SF – International Physical Activity Questionnaire-Short form, MARCA – Multimedia Activity Recall for Children and Adolescents, N/A – not applicable, NQLS – Neighborhood Quality of Life Study, NR– not reported, NS – not stated, occup. – occupational, OSPAQ – Occupational Sitting and Physical Activity Questionnaire, PAL – Physical Activity Log, PAPQ – physical activity and pregnancy Questionnaire, PAST-U – Past-day Adults' Sedentary Time-University, PDR – Previous Day Recall, PPAQ – Paffenbarger Physical Activity Questionnaire, PYPAQ – Past Year Physical Activity Questionnaire, Quest. – questionnaire, SITBRQ – Workplace Sitting Breaks Questionnaire, SIT-Q-7d – last 7-day sedentary behavior Questionnaire, ST – sedentary time, STAQ – Sedentary, Transportation and Activity Questionnaire, UK – United Kingdom, USA - United States of America, VM – vector magnitude, WSQ – Workforce Sitting Questionnaire, x – vertical axis, YPAS – Yale Physical Activity Survey for Older Adults

\*Note: The IPAQ-LF is a single sitting item for weekdays and weekend days separately unless otherwise stated. The IPAQ-LF was assumed to reference the last 7 days unless otherwise specified. The GPAQ was assumed as a typical day in a usual week unless otherwise specified.
