# Supplementary material for: A comparison of self-reported and device measured sedentary behaviour in adults: a systematic review and meta-analysis
Source: PubMed Central journal article supplement (PMC7055033; doi:10.1186/s12966-020-00938-3), 2020-03-04
Supplement: 12966_2020_938_MOESM16_ESM.pdf [file 12966_2020_938_MOESM16_ESM.pdf]

Supplemental table 3. Validity characteristics

| First author, year   | Population                                | Self-report measure      |                                                  |          |                                                                            | Device measure |                |          |                                                                            | Correlation                                                             | MD:<br>Self-report – device*                                                                                             |
|----------------------|-------------------------------------------|--------------------------|--------------------------------------------------|----------|----------------------------------------------------------------------------|----------------|----------------|----------|----------------------------------------------------------------------------|-------------------------------------------------------------------------|--------------------------------------------------------------------------------------------------------------------------|
|                      |                                           | Name                     | Domain or type                                   | Units    | Mean (SD)*                                                                 | Name           | Domain or type | Units    | Mean (SD)*                                                                 |                                                                         |                                                                                                                          |
| Abraham, 2009        | Apparently healthy                        | Bouchard Activity Record | Sitting (categories 1 and 2)                     | min/d    | 487.0 (194.3)                                                              | ActiGraph GT1M | ST             | min/day  | 650.6 (111.8)                                                              | r = 0.56, p <.001                                                       | 163.6 (150.6)                                                                                                            |
|                      |                                           |                          |                                                  |          |                                                                            | activPAL       | Sitting/lying  |          | 518.5 (147.8)                                                              | r = 0.87, p <.001                                                       | 31.5 (107.6)                                                                                                             |
| Adams, 2015          | Apparently healthy                        | IPAQ                     | Sitting                                          | min/week | Seattle: 2555.0 (1230.5),<br>Baltimore: 2553.7 (1253.4)                    | ActiGraph      | ST             | min/day  | Seattle: 494.4 (106.4),<br>Baltimore: 506.8 (105.2)                        | NR                                                                      | NR                                                                                                                       |
| Aguilar-Farias, 2015 | Community-dwelling older adults           | Generic sitting question | Sitting                                          | h/day    | Average = 6.16 (2.35); Weekday = 6.19 (2.41),<br>Weekend day = 6.09 (2.35) | activPAL       | ST             | h/day    | Average = 9.60 (1.66), weekday = 9.55 (1.64),<br>weekend day = 9.68 (1.96) | Average = 0.33, weekday = 0.31,<br>weekend = 0.28                       | Average = -3.53 (LoA: -8.10, 1.05), weekday = -3.45 (LoA: -8.57, 1.25),<br>yesterday = -3.30 (LoA: -8.78, 2.19)          |
|                      |                                           | MARCA                    | ST                                               |          | Average = 11.42 (1.99)                                                     |                |                |          |                                                                            | Yesterday = 0.49, average = 0.63,<br>day before yesterday = 0.67        | Average = 1.66 (LoA: -1.49, 4.82) day before yesterday = 0.82 (LoA: -3.54, 5.18),<br>yesterday = 1.47 (LoA: -3.45, 6.40) |
| Aguilar-Farias, 2017 | General population                        | GPAQ                     | Sitting                                          | min/day  | Total: 259.7 (211.67), men: 241.9 (164.53),<br>women: 272.4 (239.67)       | ActiGraph GT3X | ST             | min/day  | Total: 555.2 (168.03), men: 533.7 (165.17),<br>women: 571.0 (170.35)       | r = 0.23, p<.001, men: r = 0.23, p = 0.03,<br>women: r = 0.21, p = 0.02 | -293.9 (LoA: -768.9, 181.2)                                                                                              |
| Aittasalo, 2017      | Employees from small to medium workplaces | WSQ                      | Sitting (work, home, travel)                     | min/day  | 509 (142)                                                                  | Hookie AM13    | ST             | min/day  | 298.5 (81.3)                                                               | NR                                                                      | NR                                                                                                                       |
| Alkahtani, 2016      | Male university students                  | GPAQ                     | Sitting                                          | h/day    | Median (IQR): 6.0 (3.0, 9.0)                                               | ActiGraph GT3X | ST             | h/day    | Median (IQR): 9.4 (8.6, 10.2)                                              | 0.08                                                                    | 3.3 (LoA: -3.1, 9.7)                                                                                                     |
| Anjana, 2015         | Urban and rural populations               | MPAQ                     | TV, sitting                                      | min/week | 4965 (869)                                                                 | ActiGraph GT3X | ST             | min/week | 5009 (785)                                                                 | r = 0.484 (95% CI: 0.32, 0.62)                                          | 44.4 (LoA: -1599.1, 1687.8)                                                                                              |
| Barone Gibbs, 2017   | Older adults                              | CHAMPS                   | TV, computer (work or recreation), riding in car | h/day    | Median (IQR): Sit less: 7.8 (7.1, 10.1),<br>Get Active: 10.3 (6.3, 13.5)   | SenseWear Pro  | ST             | h/day    | Sit less: 10.5 (0.3),<br>Get Active: 10.3 (0.6) *least                     | NR                                                                      | NR                                                                                                                       |

| First author, year   | Population                                          | Self-report measure                                                   |                |             |                                                                                                                                        | Device measure |                |               |                                                                                                                                        | Correlation                                                                                                                                                                            | MD:<br>Self-report – device*                                                                               |
|----------------------|-----------------------------------------------------|-----------------------------------------------------------------------|----------------|-------------|----------------------------------------------------------------------------------------------------------------------------------------|----------------|----------------|---------------|----------------------------------------------------------------------------------------------------------------------------------------|----------------------------------------------------------------------------------------------------------------------------------------------------------------------------------------|------------------------------------------------------------------------------------------------------------|
|                      |                                                     | Name                                                                  | Domain or type | Units       | Mean (SD)*                                                                                                                             | Name           | Domain or type | Units         | Mean (SD)*                                                                                                                             |                                                                                                                                                                                        |                                                                                                            |
|                      |                                                     |                                                                       |                |             |                                                                                                                                        |                |                |               | square means and SE                                                                                                                    |                                                                                                                                                                                        |                                                                                                            |
| Barwais, 2014        | Sedentary adults                                    | Sedentary and Light Intensity Physical Activity Log (7-Day SLIPA log) | Sum of SBs     | h/day       | Sedentary: total = 15.2 (1.7); men = 15.7 (1.7); women = 14.4 (1.5).<br>Sitting: total = 9.3 (2.0); men = 9.8 (1.7); women = 8.2 (2.3) | ActiGraph GT3X | ST             | h/day         | Sedentary: total = 15.5 (1.9); men = 16.0 (1.9); women = 14.6 (1.5).<br>Sitting: total = 7.5 (1.1); men = 7.7 (1.0); women = 7.2 (1.2) | Pearson: sedentary = 0.86 (95% CI: 0.70, 0.94), sitting = 0.60 (95% CI: 0.24, 0.81),<br>Weighted kappa: sedentary = 0.61 (95% CI: 0.443, 0.769); sitting = 0.22 (95% CI: 0.059, 0.389) | Sedentary = -0.3 (LoA: -2.1, 1.6), sitting = 1.8 (LoA: -1.5, 5.0)                                          |
| Benitez-Porres, 2013 | Fibromyalgia patients                               | IPAQ                                                                  | Sitting        | min/day     | 222 (116)                                                                                                                              | ActiGraph GT1M | ST             | min/day       | 598 (126)                                                                                                                              | r = 0.148, p = 0.164                                                                                                                                                                   | -371.3 (LoA: -76.5, -666.1)                                                                                |
| Biddle, 2012         | Young adults at risk for diabetes                   | IPAQ                                                                  | Sitting        | min/day     | NR                                                                                                                                     | ActiGraph GT3X | ST             | min/day       | 615.07 (103.94)                                                                                                                        | r = 0.326, p < 0.01                                                                                                                                                                    | -251 (LoA: 499, -1001)                                                                                     |
|                      |                                                     | Marshall Questionnaire                                                | ST             |             |                                                                                                                                        |                |                |               |                                                                                                                                        | r = 0.311, p < 0.01                                                                                                                                                                    | 22 (LoA: -518, 560)                                                                                        |
| Biswas, 2018         | Cardiac rehab patients                              | SBQ                                                                   | SBs            | h/day       | Weekday: 7.8 (3.4), weekend day: 8.1 (4.0)                                                                                             | ActiGraph GT3X | ST             | h/day         | 4.6 (2.7)                                                                                                                              | R = 0.21, p = 0.26                                                                                                                                                                     | NR                                                                                                         |
| Blanchard, 2010      | Older adults                                        | Diary                                                                 | Driving        | min + h/day | 4h24min (3h45min)                                                                                                                      | CarChip E/X    | Driving time   | min + hrs/day | 4h11min (3h38min)                                                                                                                      | NR                                                                                                                                                                                     | NR                                                                                                         |
| Blikman, 2014        | Patients after total hip Arthroplasty               | IPAQ-SF, IPAQ-LF                                                      | Sitting        | NR          | NR                                                                                                                                     | NR             | ST             | NR            | NR                                                                                                                                     | r = 0.18 (long form), r = 0.01 (short form)                                                                                                                                            | NR                                                                                                         |
| Bond, 2013           | Bariatric surgery patients                          | SBQ                                                                   | SBs            | h/day       | Weekdays: 9.98 (5.28), weekend day: 8.71 (4.62), all days: 9.61 (4.83)                                                                 | SenseWear Pro2 | ST             | h/day         | Weekdays: 9.46 (2.06), weekend: 8.78 (1.98), all days: 9.27 (1.85)                                                                     | Weekdays ICC = 0.22, p = 0.06, weekend: ICC = 0.19, p = 0.08, all days ICC = 0.22, p = 0.06                                                                                            | Weekdays = -0.51 (LoA: 0.2, 13.6), weekend days = 0.08 (LoA: 0.1, 11.5), all days = -0.34 (LoA: 0.2, 13.1) |
| Bonn, 2015           | Men who underwent Prostate Specific Antigen testing | Active-Q                                                              | SBs            | min/day     | 606 (136)                                                                                                                              | GENEA          | ST             | min/day       | 789 (186)                                                                                                                              | r = 0.19 (95% CI: 0.04-0.34)                                                                                                                                                           | -178 (LoA: -606, 250)                                                                                      |

| First author, year    | Population                                                                                            | Self-report measure                            |                    |              |                                                                                                                                                                                                | Device measure |                |                |                                                                                                                                                                                               | Correlation                                                                                                                                                                                                                             | MD:<br>Self-report – device*                                                                                                 |
|-----------------------|-------------------------------------------------------------------------------------------------------|------------------------------------------------|--------------------|--------------|------------------------------------------------------------------------------------------------------------------------------------------------------------------------------------------------|----------------|----------------|----------------|-----------------------------------------------------------------------------------------------------------------------------------------------------------------------------------------------|-----------------------------------------------------------------------------------------------------------------------------------------------------------------------------------------------------------------------------------------|------------------------------------------------------------------------------------------------------------------------------|
|                       |                                                                                                       | Name                                           | Domain or type     | Units        | Mean (SD)*                                                                                                                                                                                     | Name           | Domain or type | Units          | Mean (SD)*                                                                                                                                                                                    |                                                                                                                                                                                                                                         |                                                                                                                              |
| Boyle, 2015           | Colon cancer survivors                                                                                | Marshall Domain-Specific Sitting Questionnaire | SBs                | h/day        | 8.5 (95%CI: 8.0-9.0)                                                                                                                                                                           | ActiGraph GT3X | ST             | h/day          | 8.7 (95% CI: 8.5-9.0)                                                                                                                                                                         | r = 0.19, ICC = 0.16 (95% CI: 0.01, 0.30)                                                                                                                                                                                               | NR                                                                                                                           |
| Bruening, 2016        | College students                                                                                      | devilSPARC mEMA                                | SBs                | % of reports | 81.40%                                                                                                                                                                                         | ActiGraph GT3X | ST             | % of wear time | 53.60%                                                                                                                                                                                        | NR                                                                                                                                                                                                                                      | NR                                                                                                                           |
| Bueno-Antequera, 2017 | Outpatients with severe mental illness                                                                | SBQ                                            | SBs                | h/day        | 9.2 (3.6)                                                                                                                                                                                      | SenseWear      | ST             | h/day          | 8.9 (2.4)                                                                                                                                                                                     | Weekday: r = 0.21, p = 0.044; weekend: r = 0.16, p = 0.132, average r = 0.20, p = 0.053)                                                                                                                                                | LoA: weekdays (8.37, -6.82), weekend days (9.44, -8.53) and average day ST (8.23, -6.89)                                     |
| Busschaert, 2015      | General population                                                                                    | last-7-day SB questionnaire (SIT-Q-7d)         | Sitting/lying down | mins/day     | Adults: weekday = 648.18 (270.12), weekend day = 512.27 (238.02), average = 609.35 (242.73). Older adults: weekday = 515.45 (176.26), weekend day = 506.36 (160.32), average = 512.86 (162.08) | activPAL       | Sitting        | mins/day       | Adults: weekday = 479.18 (156.26), weekend day = 447.76 (99.07), average = 470.20 (125.46). Older adults: weekday = 477.67 (111.33), weekend day = 551.76 (115.60), average = 498.84 (102.47) | Adults: weekday r = 0.52 (95% CI: 0.22; 0.73); weekend day r = 0.06 (-0.29; 0.40); average r = 0.49 (0.18; 0.71). Older adults: weekday r = 0.50 (95% CI: 0.19; 0.72); weekend day r = 0.38 (0.04; 0.64); average r = 0.48 (0.16; 0.71) | Older adults: weekday = 35.80 (LoA: 535.51, 11.24); weekend day = -45.46 (-577.29, -0.37); average = 16.32 (-534.18, -40.21) |
| Camhi, 2015           | Metabolically healthy obese (MHO) and metabolically abnormal obese (MAO), young black and white women | NR                                             | Sitting            | mins/day     | MHO = 299.0 (56.4), MAO = 422.4 (78.6)                                                                                                                                                         | NR             | ST             | h/day          | MHO = 585.8 (21.6), MAO = 643.8 (30.1)                                                                                                                                                        | NR                                                                                                                                                                                                                                      | NR                                                                                                                           |
| Celis-Morales, 2012   | Chilean population (general pop)                                                                      | IPAQ                                           | Sitting            | min/day      | 454.2 (103.1)                                                                                                                                                                                  | Actitrainer    | ST             | min/day        | 523.1 (90.9)                                                                                                                                                                                  | r = 0.654, 95% CI: 0.570, 0.738; concordance correlation = 0.519, 95% CI: 0.402, 0.697                                                                                                                                                  | -68.8 (LoA: -228.3, 90.8),                                                                                                   |

| First author, year | Population                                       | Self-report measure                                                                                                                                                                                                                                                                                                                                                                                                                                                           |                                                                          |          |                                                                                                                                                                                                                                                                                                                                                                                                                              | Device measure          |                |          |                                                 | Correlation                                                                                                                                                                                                                                                                                                                                                                                                                                                                                                                                | MD:<br>Self-report – device*                                                                                                                                                                                                                                                                                                                                                                                                                                                                                                                           |
|--------------------|--------------------------------------------------|-------------------------------------------------------------------------------------------------------------------------------------------------------------------------------------------------------------------------------------------------------------------------------------------------------------------------------------------------------------------------------------------------------------------------------------------------------------------------------|--------------------------------------------------------------------------|----------|------------------------------------------------------------------------------------------------------------------------------------------------------------------------------------------------------------------------------------------------------------------------------------------------------------------------------------------------------------------------------------------------------------------------------|-------------------------|----------------|----------|-------------------------------------------------|--------------------------------------------------------------------------------------------------------------------------------------------------------------------------------------------------------------------------------------------------------------------------------------------------------------------------------------------------------------------------------------------------------------------------------------------------------------------------------------------------------------------------------------------|--------------------------------------------------------------------------------------------------------------------------------------------------------------------------------------------------------------------------------------------------------------------------------------------------------------------------------------------------------------------------------------------------------------------------------------------------------------------------------------------------------------------------------------------------------|
|                    |                                                  | Name                                                                                                                                                                                                                                                                                                                                                                                                                                                                          | Domain or type                                                           | Units    | Mean (SD)*                                                                                                                                                                                                                                                                                                                                                                                                                   | Name                    | Domain or type | Units    | Mean (SD)*                                      |                                                                                                                                                                                                                                                                                                                                                                                                                                                                                                                                            |                                                                                                                                                                                                                                                                                                                                                                                                                                                                                                                                                        |
| Cerin, 2012        | Urban older adults                               | IPAQ - Long                                                                                                                                                                                                                                                                                                                                                                                                                                                                   | Sitting                                                                  | min/week | 1968 (621)                                                                                                                                                                                                                                                                                                                                                                                                                   | ActiGraph GT1M          | ST             | min/week | 3585 (792)                                      | 0.16, NS                                                                                                                                                                                                                                                                                                                                                                                                                                                                                                                                   | -1646 (95% CI: -1854, -1439)                                                                                                                                                                                                                                                                                                                                                                                                                                                                                                                           |
| Cerin, 2016        | General population                               | IPAQ - Long                                                                                                                                                                                                                                                                                                                                                                                                                                                                   | Sitting                                                                  | h/day    | 6.3 (2.9)                                                                                                                                                                                                                                                                                                                                                                                                                    | ActiGraph GT1M and GT3X | ST             | h/day    | 8.8 (1.7)                                       | r = 0.37 (95% CI: 0.35, 0.40)                                                                                                                                                                                                                                                                                                                                                                                                                                                                                                              | NR                                                                                                                                                                                                                                                                                                                                                                                                                                                                                                                                                     |
| Chapman, 2016      | Non-institutionalised adults with mental illness | Marshall Domain-Specific Sitting Questionnaire                                                                                                                                                                                                                                                                                                                                                                                                                                | Sitting: travel; work; TV; computer; leisure time (not including TV)     | h/day    | Median (IQR) = 10.3 (6.3, 14.5), mean = 10.6 (4.7)                                                                                                                                                                                                                                                                                                                                                                           | ActiGraph GT3X          | ST             | h/day    | Median (IQR): 9.2 (7.9, 10.6), mean = 9.1 (1.9) | r (69) = 0.21, p = 0.08                                                                                                                                                                                                                                                                                                                                                                                                                                                                                                                    | NR                                                                                                                                                                                                                                                                                                                                                                                                                                                                                                                                                     |
| Chasan-Taber, 2004 | Pregnant women                                   | Pregnancy Physical Activity Questionnaire (PPAQ)                                                                                                                                                                                                                                                                                                                                                                                                                              | SBs (household/care giving, occup., sports/exercise, travel, inactivity) | NR       | NR                                                                                                                                                                                                                                                                                                                                                                                                                           | ActiGraph               | ST             | NR       | NR                                              | Swartz cut-point r = -0.17, Hendlmen: r = -0.34, Freedson: r = 0.12                                                                                                                                                                                                                                                                                                                                                                                                                                                                        | NR                                                                                                                                                                                                                                                                                                                                                                                                                                                                                                                                                     |
| Chastin, 2018      | Seniors                                          | -Two single item direct measures of ST<br>-Direct question about the total time spent sitting;<br>-Visual analogue scale of proportion of day spent sitting;<br>-Single item proxy measure (TV time)<br>-Pattern based on report of # of bouts of sitting and average duration (total duration);<br>-Sum of time spent in 13 SBs (TV, work, computer/screen for leisure, reading, listening or playing music, seated hobbies, talking, eating, self-care, activities of daily | Sitting, TV, multi-SBs, domain-specific SB                               | min/day  | Previous day recall: single item total ST = 422.5 (160.9), single item proportion = 49.8% (17.5%), single TV = 191.5 (123.2), sum of domains = 499.0 (196.8), sum of behaviours = 811.9 (331.5), pattern = 589.8 (587.3). Previous week recall: single item = 486.0 (486.5), single proportion = 50.9% (16.2%), TV = 235.9 (206.5), sum = 662.6 (466.5), sum of behaviours = 1125.2 (867.8), pattern = 845.4 (1796.7). Usual | activPAL                | Sitting        | min/day  | 628.7 (120.7)                                   | Previous day: single item r = 0.20, p<.001; single item proportion r = 0.28, p<.001; single TV r = 0.24, p<.001; sum of domains r = 0.23, p<.001; sum of behaviours r = 0.23, p<.001; pattern r = 0.17, p<.001. Previous week recall: single item r = 0.23, p<.001; single item proportion r = 0.36, p<.001; TV r = 0.23, p<.001; sum of domains r = 0.30, p<.001; sum of behaviours r = 0.32, p<.001; pattern r = 0.23, p<.001. Unanchored/usual day: single item r = 0.20, p<.001; single item proportion r = 0.32, p<.001; TV r = 0.26, | Previous day recall: single item LoA = -146.8, 560.8; single item proportion LoA = -22.1, 47.8; TV LoA = 144.8, 733.2; sum of domains LoA = -272.5, 533.1; sum of behaviours LoA = -651.2, 366.7; pattern LoA = -471.6, 747.5. Previous week recall: single item LoA = -149.9, 563.9; single item proportion LoA = -19.3, 42.9; TV LoA = 80.6, 731.9; sum of domains LoA = -412.9, 482.1; sum of behaviours LoA = -755.2, 265.3; pattern LoA = -528.8, 726.9. Usual day: single item LoA = -135.1, 549.2; single item proportion LoA = -18.9, 51.1; TV |

| First author, year | Population         | Self-report measure                                                                                                                                                                                    |                                                                                               |         |                                                                                                                                                                                                                                                                                                                                                     | Device measure |                |         |                                                                                                                               | Correlation                                                                                                                                                                                                                                                                                                                                                                                                                                                              | MD:<br>Self-report – device*                                                                                                                                                                 |
|--------------------|--------------------|--------------------------------------------------------------------------------------------------------------------------------------------------------------------------------------------------------|-----------------------------------------------------------------------------------------------|---------|-----------------------------------------------------------------------------------------------------------------------------------------------------------------------------------------------------------------------------------------------------------------------------------------------------------------------------------------------------|----------------|----------------|---------|-------------------------------------------------------------------------------------------------------------------------------|--------------------------------------------------------------------------------------------------------------------------------------------------------------------------------------------------------------------------------------------------------------------------------------------------------------------------------------------------------------------------------------------------------------------------------------------------------------------------|----------------------------------------------------------------------------------------------------------------------------------------------------------------------------------------------|
|                    |                    | Name                                                                                                                                                                                                   | Domain or type                                                                                | Units   | Mean (SD)*                                                                                                                                                                                                                                                                                                                                          | Name           | Domain or type | Units   | Mean (SD)*                                                                                                                    |                                                                                                                                                                                                                                                                                                                                                                                                                                                                          |                                                                                                                                                                                              |
|                    |                    | living, napping, sitting in transport and sitting during leisure activities outside the home (e.g. watching a play at the theatre))<br>-Sum of domains time spent at work, home, transport and leisure |                                                                                               |         | day: single item = 379.2 (152.3), single proportion = 46.6% (18.1%), TV = 215.8 (123.6), sum of domains = 557.4 (234.0), sum of behaviours = 933.8 (426.8), pattern = 266.7 (743.9)                                                                                                                                                                 |                |                |         |                                                                                                                               | p<.001; sum of domains r = 0.16, p<.001; sum of behaviours r = 0.33, p<.001; pattern r = 0.02, p = 0.624.                                                                                                                                                                                                                                                                                                                                                                | LoA = 124.7, 705.4; sum of domains LoA = -372.8, 528.8; sum of behaviours LoA = -725.3, 285.6; pattern LoA = -33.8, 979.6.                                                                   |
| Chastin, 2014      | General population | IPAQ-LF                                                                                                                                                                                                | Sitting (work/home/leisure), sitting during travel                                            | h/day   | Total week = 6.6 (2.6); total week + transportation = 8.1 (2.6); total weekdays = 7.4 (2.7); total weekend days = 5.4 (2.6)                                                                                                                                                                                                                         | activPAL       | Sitting        | h/day   | Total week = 9.9 (1.9); total week + transportation = 9.9 (1.9); total weekdays = 10.6 (1.6); total weekend days = 10.9 (1.7) | Total week ICC = 0.112, r = 0.114, p = 0.351; total week + transportation ICC = 0.149, r = 0.159, p = 0.193; total weekdays ICC = 0.159, r = 0.174, p = 0.154; total weekend days ICC = 0.275, r = 0.010, p = 0.936                                                                                                                                                                                                                                                      | Total week = 3.40 (95% CI: -2.15, 8.93); total week + transportation = 2.15 (95% CI: -3.71, 7.22); total weekdays = 3.43 (95% CI: -2.08, 8.94); total weekends = 4.64 (95% CI: -2.01, 11.30) |
| Chau, 2012         | Workers            | OSPAQ                                                                                                                                                                                                  | Occup. sitting                                                                                | min/day | median = 406 (IQR: 308-450)                                                                                                                                                                                                                                                                                                                         | ActiGraph GT1M | ST             | min/day | NR                                                                                                                            | r = 0.65, p<.01                                                                                                                                                                                                                                                                                                                                                                                                                                                          | 22 (95% CI: 3, 41, LoA: -141.63, 185.18)                                                                                                                                                     |
| Chau, 2011         | Workers            | Workforce Sitting Questionnaire                                                                                                                                                                        | Occup. sitting, TV, computer at home, leisure activities, travel on workdays and non-workdays | min/day | Median (IQR): All: At work = 360 (311, 394); total all domains, workday = 600 (562, 648); total all domains, non-work days = 486 (417, 550); average total, work and non-workdays = 567 (518, 606). Women: At work = 366 (337, 408); total all domains, workday = 606 (563, 648); total all domains, non-work days = 465 (418, 538); average total, | ActiGraph GT1M | ST             | min/day | NR                                                                                                                            | All: At work r = 0.45, p<.01; total all domains, workday r = 0.34, p<.01; total all domains, non-work days r = 0.23, p<.05; average total, work and non-workdays r = 0.40, p<.01. Women: At work median r = 0.38, p<.01; total all domains, workday r = 0.31, p<.05; total all domains, non-work days r = 0.22, NS; average total, work and non-workdays r = 0.46, p<.01. Men: At work r = 0.41, p<.05; total all domains, workday r = 0.29, NS; total all domains, non- | Average total = 44.55 (LoA: -295.31, 384.41), sitting at work = 1.58 (LoA: -227.86, 231.02)                                                                                                  |

| First author, year | Population | Self-report measure                   |                                                                                               |         |                                                                                                                                                                                                                                                                                                       | Device measure |                 |         |            | Correlation                                                                                                                                                                                                                                                               | MD:<br>Self-report – device* |
|--------------------|------------|---------------------------------------|-----------------------------------------------------------------------------------------------|---------|-------------------------------------------------------------------------------------------------------------------------------------------------------------------------------------------------------------------------------------------------------------------------------------------------------|----------------|-----------------|---------|------------|---------------------------------------------------------------------------------------------------------------------------------------------------------------------------------------------------------------------------------------------------------------------------|------------------------------|
|                    |            | Name                                  | Domain or type                                                                                | Units   | Mean (SD)*                                                                                                                                                                                                                                                                                            | Name           | Domain or type  | Units   | Mean (SD)* |                                                                                                                                                                                                                                                                           |                              |
|                    |            |                                       |                                                                                               |         | work and non-workdays = 571 (532, 607). Men: At work = 344 (275, 378); total all domains, workday = 583 (562, 654); total all domains, non-work days = 507 (392, 558); average total, work and non-workdays = 566 (484, 603)                                                                          |                |                 |         |            | work days r = 0.18, NS; average total, work and non-workdays r = 0.26, NS.                                                                                                                                                                                                |                              |
|                    |            | IPAQ                                  | Sitting                                                                                       | min/day | Median (IQR): All: weekday = 598 (542, 643); weekend day = 493 (421, 550); average total = 565 (511, 606). Women: weekday = 598 (553, 639); weekend day = 471 (421, 541); average total = 561 (512, 604). Men: weekday = 598 (536, 661); weekend day = 496 (430, 562); average total = 570 (493, 607) |                |                 |         |            | All: weekday r = 0.47, p<.01; weekend day r = 0.31, p<.01; average total r = 0.46, p<.01. Women: weekday r = 0.43, p<.01; weekend day r = 0.28, NS; average total r = 0.45, p<.01. Men: weekday r = 0.57, p<.01; weekend day r = 0.37, NS; average total r = 0.43, p<.05. |                              |
| Chau, 2014         | Workers    | Workforce Sitting Questionnaire (WSQ) | Occup. sitting, TV, computer at home, leisure activities, travel on workdays and non-workdays | min/day | Sitting at work on workday = 426 (121)                                                                                                                                                                                                                                                                | activPAL3      | Sitting at work | min/day | 347 (59)   | NR                                                                                                                                                                                                                                                                        | NR                           |
|                    |            | OSPAQ                                 | Occup. sitting                                                                                |         | Sitting at work = 403 (114);                                                                                                                                                                                                                                                                          |                |                 |         |            |                                                                                                                                                                                                                                                                           |                              |

| First author, year | Population                                 | Self-report measure                                       |                                                                                                                                |          |                                                     | Device measure    |                |          |                                                             | Correlation                                                                                                                                                                                                                                                                                                             | MD:<br>Self-report – device*                                |
|--------------------|--------------------------------------------|-----------------------------------------------------------|--------------------------------------------------------------------------------------------------------------------------------|----------|-----------------------------------------------------|-------------------|----------------|----------|-------------------------------------------------------------|-------------------------------------------------------------------------------------------------------------------------------------------------------------------------------------------------------------------------------------------------------------------------------------------------------------------------|-------------------------------------------------------------|
|                    |                                            | Name                                                      | Domain or type                                                                                                                 | Units    | Mean (SD)*                                          | Name              | Domain or type | Units    | Mean (SD)*                                                  |                                                                                                                                                                                                                                                                                                                         |                                                             |
| Chinapaw, 2009     | Workers                                    | Activity Questionnaire for Adults and Adolescents (AQuAA) | SBs                                                                                                                            | min/week | Median (IQR) = 3045 (2455, 3610)                    | ActiGraph 7164    | ST             | min/week | Median (IQR) = 5307 (4956, 5458)                            | r = 0.15, NS                                                                                                                                                                                                                                                                                                            | Median diff = 2216 (IQR: 1579, 2729)                        |
| Chu, 2018          | University desk workers                    | ASBQ                                                      | Occup.; travel; leisure-time; other                                                                                            | min/day  | 164.1 (148.9)                                       | ActiGraph GT3X BT | ST             | min/day  | 663.8 (70.4)                                                | Sum r = 0.10 (95% CI: -0.12, 0.32); occup. r = 0.18 (95% CI: -0.05, 0.38); transportation r = 0.11 (95% CI: -0.12, 0.32); eating r = 0.07 (95% CI: -0.16, 0.29); TV r = 0.05 (95% CI: -0.18, 0.26); leisure-time computer use r = -0.10 (95% CI: -0.32, 0.12); other leisure activities r = -0.05 (95% CI: -0.27, 0.18) | 4.6 (LoA: -431.2, 440.4)                                    |
|                    |                                            | GPAQ                                                      | Sitting                                                                                                                        |          | 213.2 (150.9)                                       |                   |                |          |                                                             |                                                                                                                                                                                                                                                                                                                         |                                                             |
| Clark, 2015        | General population                         | AusDiab3 questionnaire                                    | Work, travel, TV viewing, leisure computer use and “other” purposes, on weekdays and weekend days                              | h/day    | 6.85 (2.69), women = 6.43 (2.47); men = 7.36 (2.86) | activPAL3         | Sitting        | h/day    | Total = 8.86 (1.81), women = 8.55 (1.81); men = 9.24 (1.74) | Total r = 0.46 (95% CI: 0.40, 0.52); women r = 0.47 (95% CI: 0.39, 0.55); men r = 0.42 (95% CI: 0.32, 0.41)                                                                                                                                                                                                             | Total = 2.01 (2.45); women = 2.12 (2.26); men = 1.87 (2.66) |
| Clark, 2016        | University population (students and staff) | Past-day Adults’ ST-University (PAST-U)                   | Sitting or lying down: work, study, travel, TV viewing, leisure-time computer, reading, eating, socialising and other purposes | h/day    | Composite sum = 10.72 (2.42)                        | activPAL          | Sitting        | h/day    | 10.65 (2.42)                                                | ICC = 0.64 (95% CI: 0.45, 0.77)                                                                                                                                                                                                                                                                                         | 5 min (LoA: -3.9, 4.1)                                      |

| First author, year | Population                                                               | Self-report measure                    |                                                                                                                                                                                         |         |                                                                                                                                                           | Device measure            |                   |         |                                                                                                                                                  | Correlation                                                                                                                                                                                             | MD:<br>Self-report – device*                                                                            |
|--------------------|--------------------------------------------------------------------------|----------------------------------------|-----------------------------------------------------------------------------------------------------------------------------------------------------------------------------------------|---------|-----------------------------------------------------------------------------------------------------------------------------------------------------------|---------------------------|-------------------|---------|--------------------------------------------------------------------------------------------------------------------------------------------------|---------------------------------------------------------------------------------------------------------------------------------------------------------------------------------------------------------|---------------------------------------------------------------------------------------------------------|
|                    |                                                                          | Name                                   | Domain or type                                                                                                                                                                          | Units   | Mean (SD)*                                                                                                                                                | Name                      | Domain or type    | Units   | Mean (SD)*                                                                                                                                       |                                                                                                                                                                                                         |                                                                                                         |
| Clark, 2011        | Full time workers                                                        | NR                                     | Occup. sitting, breaks in sitting                                                                                                                                                       | h/day   | 7.05 (1.31)                                                                                                                                               | ActiGraph GT1M            | ST                | h/day   | 6.60 (0.94)                                                                                                                                      | r = 0.39 (95% CI = 0.22–0.53)                                                                                                                                                                           | 0.45 (95% CI: 0.23, 0.66)                                                                               |
| Clark, 2013        | Breast cancer survivors                                                  | Past-day Adults' Sedentary Time (PAST) | Single weekday: sitting or lying while at work, travelling, watching TV, using the computer (excluding work), reading (excluding work), hobbies, and any other not reported in previous | h/day   | Composite sum = 8.20 (2.81)                                                                                                                               | activPAL3, ActiGraph GT3X | Sitting/lying, ST | h/day   | ActivPAL: On day of recall total time = 9.2 (2.4); average daily = 8.8 (1.5), ActiGraph: day of recall = 8.9 (1.4); average day = 8.9 (1.0)      | ActivPAL: Day of recall r = 0.58 (95% CI: 0.40, 0.72); average daily r = 0.34 (95% CI: 0.12, 0.43), ActiGraph: day of recall r = 0.51 (95% CI: 0.29, 0.68); average daily r = 0.45 (95% CI: 0.22, 0.63) | activPAL of 5+ mins: = -0.15 (95% CI: -0.72, 0.42, LoA: -4.90, 4.60)                                    |
| Clayton, 2016      | Men with prostate cancer and history of Androgen-Deprivation Therapy use | IPAQ                                   | Sitting                                                                                                                                                                                 | h/day   | 5.9 (3.1)                                                                                                                                                 | activPAL3                 | Sitting           | h/day   | 9.6 (2.5)                                                                                                                                        | r = 0.22, p = 0.04                                                                                                                                                                                      | 3.5                                                                                                     |
| Cleland, 2014      | Middle-aged men and women                                                | GPAQ                                   | Sitting                                                                                                                                                                                 | min/day | Median (IQR): total = 300 (180, 435); women = 240 (180, 360); men = 360 (180, 480)                                                                        | ActiGraph GT3X            | ST                | min/day | Median (IQR): total = 696 (617, 751); women = 660 (613, 719); men = 715 (627, 776)                                                               | Overall: r = 0.187, p = 0.135; women r = 0.378, p = 0.027; men r = -0.053, p = 0.778                                                                                                                    | -348.7 (LoA: -721.1, 23.7)                                                                              |
| Cleland, 2018      | Older adults                                                             | IPAQ - Long                            | Sitting                                                                                                                                                                                 | min/day | Median (IQR): weekday: total median = 300.0 (197.5, 420.0); men = 300.0 (240, 435); women = 240.0 (180, 360). Weekend day: total median = 300 (240, 420); | ActiGraph GT3X            | ST                | min/day | Median (IQR): weekday: total median = 486.9 (425.8, 566.5); men = 513.5 (460.5, 600.8); women = 453.2 (393.0, 522.5). Weekend day: total = 501.4 | Weekday: total r = 0.70, p = 0.01; men r = 0.49, p = 0.01; women r = 0.47, p = 0.01. Weekend day: total r = 0.26, NS; men r = 0.55, p = 0.01; women r = 0.36, p = 0.01                                  | Weekday = -168.6 (SD = 144.5, LoA: -451.8, 114.6), weekend day = -173.9 (SD = 136.6, LoA: -441.6, 93.8) |



| First author, year  | Population         | Self-report measure  |                                                                    |          |                                                                  | Device measure          |                |            |                                                                          | Correlation                                                                                          | MD:<br>Self-report – device*                                             |
|---------------------|--------------------|----------------------|--------------------------------------------------------------------|----------|------------------------------------------------------------------|-------------------------|----------------|------------|--------------------------------------------------------------------------|------------------------------------------------------------------------------------------------------|--------------------------------------------------------------------------|
|                     |                    | Name                 | Domain or type                                                     | Units    | Mean (SD)*                                                       | Name                    | Domain or type | Units      | Mean (SD)*                                                               |                                                                                                      |                                                                          |
|                     |                    |                      |                                                                    |          | men = 360 (240, 480); women = 240 (180, 360)                     |                         |                |            | (436.2, 580.2); men = 529.3 (459.3, 597.2); women = 477.1 (419.9, 549.7) |                                                                                                      |                                                                          |
| Clemes, 2012        | University staff   | NR                   | Sitting                                                            | min/day  | Weekday: 466.8 (161.7); weekend day: 391.4 (171.3)               | ActiGraph GT1M          | ST             | min/day    | Weekday: 639.7 (133.9); weekend day: 612.4 (132.7)                       | Weekday: r = 0.70 (p<.001); ICC = 0.82 (p<.001); weekend day: r = 0.55 (p<.001); ICC = 0.69 (p<.001) | Weekday = -173 (LoA: -401.6, 55.6); weekend = -218.6 (LoA: -509.6, 72.4) |
|                     |                    | NR                   | Travel, work, TV, computer at home, leisure time, not including TV |          | Weekday: 626.0 (222.1); weekend day: 615.6 (280.0)               |                         |                |            |                                                                          |                                                                                                      |                                                                          |
| Conroy, 2013        | College students   | IPAQ - short         | Sitting                                                            | min/day  | 369.68 (154.62)                                                  | ActiGraph GT3X          | ST             | Proportion | 66.54% (8.63%)                                                           | r = 0.34                                                                                             | NR                                                                       |
| Craig, 2003         | General population | IPAQ-SF and IPAQ-LF  | Sitting                                                            | min/day  | NR                                                               | CSA 7164                | ST             | NR         | NR                                                                       | Long form range r = 0.14 to 0.51 (depended on mode), short form range: 0.07 to 0.61                  | NR                                                                       |
| Curry, 2015         | South Asian women  | IPAQ - short         | Sitting                                                            | min/week | 2207.17 (1868.86)                                                | ActiGraph GT1M and GT3X | ST             | min/week   | 3474.94 (508.06)                                                         | r = -0.140, p = 0.229                                                                                | 223.83 (LoA: -337.24, 785.66)                                            |
| Dahl-Petersen, 2013 | Inuit              | Modified IPAQ - long | Sitting                                                            | h/day    | Median (IQR): men = 11.9 (10.0, 14.0), women = 11.3 (10.0, 13.2) | Actiheart               | ST             | h/day      | Median (IQR): men = 14.9 (13.0, 17.2), women = 15.8 (13.8-17.5)          | Men r = -0.01, p = 0.8, omen r = 0.06, p = 0.10                                                      | NR                                                                       |

| First author, year | Population                    | Self-report measure   |                                                                                                                                                   |         |                                                                                                                                                                                                                                                                                                                                                                                                                                                                                                                                                                                            | Device measure |                |         |                                                                                    | Correlation                    | MD:<br>Self-report – device* |
|--------------------|-------------------------------|-----------------------|---------------------------------------------------------------------------------------------------------------------------------------------------|---------|--------------------------------------------------------------------------------------------------------------------------------------------------------------------------------------------------------------------------------------------------------------------------------------------------------------------------------------------------------------------------------------------------------------------------------------------------------------------------------------------------------------------------------------------------------------------------------------------|----------------|----------------|---------|------------------------------------------------------------------------------------|--------------------------------|------------------------------|
|                    |                               | Name                  | Domain or type                                                                                                                                    | Units   | Mean (SD)*                                                                                                                                                                                                                                                                                                                                                                                                                                                                                                                                                                                 | Name           | Domain or type | Units   | Mean (SD)*                                                                         |                                |                              |
| De Cocker, 2016    | Flemish employees             | WBQ                   | Sitting on workday and non-workday while 1) travel, 2) work, 3) TV, 4) computer at home (non-work related), and 5) doing other leisure activities | min/day | Total Workday sitting: tailored = 507 (104), generic = 457 (107), control = 449 (126), Total non-workday sitting tailored = 141 (70), generic = 130 (63), control = 123 (58), Sitting at work: tailored = 338 (107), generic = 288 (59), control = 281 (65), Sitting during transport: tailored = 78 (84), generic = 66 (79), control = 81 (106), TV viewing: tailored = 100 (57), generic = 95 (62), control = 91 (68), personal computer use: tailored = 50 (46), generic = 51 (40), control = 58 (62), other leisure sitting: tailored = 101 (42), generic = 99 (61), control = 95 (48) | activPAL       | Sitting        | h/day   | Total sitting awake: tailored = 576 (109), generic = 578 (101), control = 605 (96) | NR                             | NR                           |
| De Greef, 2011     | Patients with Type 2 diabetes | IPAQ                  | Sitting                                                                                                                                           | min/day | Intervention: 463 (122), control: 505 (174)                                                                                                                                                                                                                                                                                                                                                                                                                                                                                                                                                | ActiGraph 7164 | ST             | min/day | Intervention: 1140 (90), control: 1118 (109)                                       | NR                             | NR                           |
| Doyle, 2018        | Emirati university students   | GPAQ (Arabic version) | Sitting                                                                                                                                           | min/day | Median = 360 (IQR: 240-600)                                                                                                                                                                                                                                                                                                                                                                                                                                                                                                                                                                | ActiGraph GT3X | ST             | min/day | Median = 492 (IQR: 431-563)                                                        | r = -0.02, 95% CI: -0.35, 0.33 | 99 (LoA: -539, 341)          |

| First author, year | Population                                                               | Self-report measure |                             |          |                                                                                                                    | Device measure |                |         |                                                                                         | Correlation                                                                                                                                                                                                                         | MD:<br>Self-report – device*                                                                                                                          |
|--------------------|--------------------------------------------------------------------------|---------------------|-----------------------------|----------|--------------------------------------------------------------------------------------------------------------------|----------------|----------------|---------|-----------------------------------------------------------------------------------------|-------------------------------------------------------------------------------------------------------------------------------------------------------------------------------------------------------------------------------------|-------------------------------------------------------------------------------------------------------------------------------------------------------|
|                    |                                                                          | Name                | Domain or type              | Units    | Mean (SD)*                                                                                                         | Name           | Domain or type | Units   | Mean (SD)*                                                                              |                                                                                                                                                                                                                                     |                                                                                                                                                       |
| Duncan, 2019       | Individuals with schizophrenia                                           | IPAQ-SF             | Sitting                     | min/day  | 424.6 (247.0)                                                                                                      | ActiGraph GT3X | ST             | min/day | 1 minute bouts: 515.7 (135.8); 10 min bouts: 403.1 (138.1); 30 min bouts: 213.6 (111.9) | 1 minute bouts: ICC: 0.21 (CI: 0.04–0.36), p = 0.004, r = 0.25, p = 0.029; 10 minute bouts: ICC = 0.23 (CI: 0.06–0.39), p = 0.004, r = 0.30, p = 0.009; 30 minute bouts: ICC = 0.09 (CI: –0.05–0.24), p = 0.04, r = 0.26, p = 0.023 | 1 minute bouts: = -86.1 (95% LoA: -569.9, 397.6), 10 minute bouts: = 26.8 min (95% LoA: -458.7, 512.3); 30 minute bouts: = 220.7 (LoA: -266.6, 708.0) |
| Dyrstad, 2014      | General population                                                       | IPAQ-SF             | Sitting                     | min/day  | 420 (95% CI: 412–429)                                                                                              | ActiGraph GT1M | ST             | min/day | 551 (95% CI: 547, 555)                                                                  | NR                                                                                                                                                                                                                                  | All = -131 (SD = 166), men = -127 (SE = 6); women = -134 (SE = 5)                                                                                     |
| Eklom, 2015        | General population                                                       | NR                  | Sitting                     | h/day    | Men: median (IQR) = 300 (180, 420); women = 240 (180, 420)                                                         | ActiGraph GT3X | ST             | min/day | Men: median (IQR) = 528 (470, 589); women median = 502 (438, 560)                       | r = 0.30, p<0.05                                                                                                                                                                                                                    | Median difference = -185 (5 <sup>th</sup> , 95 <sup>th</sup> percentile: -467, 119)                                                                   |
| Ekelund, 2006      | Workers                                                                  | IPAQ-SF             | Sitting                     | h/day    | men: median (IQR) 6.9 (4.6, 8.6); women: 6.9 (5.2, 8.9)                                                            | ActiGraph 7164 | ST             | min/day | Men: 427 (74), women: 394 (69)                                                          | r = 0.16, p<0.05                                                                                                                                                                                                                    | NR                                                                                                                                                    |
| Ellingson, 2012    | Healthy women                                                            | IPAQ-LF             | Sitting (weekday + weekend) | min/week | Meets: 3125 (883); inactive: 3357 (1128)                                                                           | ActiGraph GT1M | ST             | min/day | Meets: 580 (80); inactive: 611 (47)                                                     | NR                                                                                                                                                                                                                                  | NR                                                                                                                                                    |
| Elramli, 2017      | People within first 5 years of being diagnosed with rheumatoid arthritis | IPAQ-LF             | Sitting (weekday + weekend) | h/day    | Weekday: intervention = 5.3 (1.9); control = 4.7 (2.5). Weekend day: intervention = 5.1 (2.1); control = 4.6 (2.5) | activPAL       | Sitting/lying  | h/day   | Intervention: 18.0 (1.9); control: 18.5 (1.4)                                           | NR                                                                                                                                                                                                                                  | NR                                                                                                                                                    |
| Emadian, 2017      | Overweight & obese South Asian men                                       | IPAQ-LF             | Sitting (weekday + weekend) | min/day  | 577.8 (860.7)                                                                                                      | ActiGraph GT3X | ST             | min/day | 551.4 (95.0)                                                                            | NR                                                                                                                                                                                                                                  | -56.2 (p = 0.610, LoA: 1631.2, 1518.9)                                                                                                                |
| English, 2016      | Individuals who had                                                      | MARCA               | SBs (TV, video games,       |          | Total Sitting: stroke = 729                                                                                        | activPAL3      | Sitting        | h/day   | Stroke: 10.9 (2.0), control: 8.2 (2.0)                                                  | NR                                                                                                                                                                                                                                  | NR                                                                                                                                                    |

| First author, year | Population                         | Self-report measure                                   |                                                                                                        |          |                                                                 | Device measure |                |          |                               | Correlation                                                                                                | MD:<br>Self-report – device*                                                                                                         |
|--------------------|------------------------------------|-------------------------------------------------------|--------------------------------------------------------------------------------------------------------|----------|-----------------------------------------------------------------|----------------|----------------|----------|-------------------------------|------------------------------------------------------------------------------------------------------------|--------------------------------------------------------------------------------------------------------------------------------------|
|                    |                                    | Name                                                  | Domain or type                                                                                         | Units    | Mean (SD)*                                                      | Name           | Domain or type | Units    | Mean (SD)*                    |                                                                                                            |                                                                                                                                      |
|                    | experienced a stroke               |                                                       | reading, computer)                                                                                     |          | (143), control = 602 (153)                                      |                |                |          |                               |                                                                                                            |                                                                                                                                      |
| Fitzsimons, 2012   | Scottish adults                    | IPAQ-LF (weekday only asked)                          | Sitting (weekday)                                                                                      | min/day  | 504 (192)                                                       | activPAL3      | Sitting        | min/day  | 667 (SD 81)                   | ICC = 0.24 (95% CI - 0.07, 0.51)                                                                           | 162 (95% CI: 105, 220)                                                                                                               |
| Fitzsimons, 2013   | Older Scottish adults              | SBQ                                                   | Total ST (combined items)                                                                              | h/week   | 51.8 (99.5), weekdays = 33.8 (75.0), weekend days = 18.0 (31.5) | activPAL3      | Sitting/lying  | h/day    | 18.06 (1.54)                  | NR                                                                                                         | NR                                                                                                                                   |
| Fjeldsoe, 2009     | Women with young children          | AWAS                                                  | Sitting (across multiple domains)                                                                      | min/week | Median (IQR): 2385 (1480)                                       | ActiGraph MT1  | ST             | min/week | Median (IQR): 2829 (568)      | r = 0.32, p = 0.006                                                                                        | NR                                                                                                                                   |
| Fowles, 2017       | University population              | CSEP PASBQ                                            | Occup., leisure & total sitting                                                                        | h/day    | 6.4 (3.5)                                                       | ActiGraph GT3X | ST             | h/day    | 12.2 (1.2)                    | r = 0.29, p = 0.13                                                                                         | NR                                                                                                                                   |
| French, 2007       | Transportation workers             | modified IPAQ                                         | Sitting                                                                                                | h/day    | 9.3 (SE = 0.13)                                                 | ActiGraph      | ST             | min/day  | 342.8 (SE = 6.2)              | NR                                                                                                         | NR                                                                                                                                   |
| Gao, 2017          | Finnish and Chinese office workers | Long-term and short-term ST                           | Occup. sitting                                                                                         | % of day | Long-term: 79.0 (13.5); short-term: 79.3 (14.3)%                | X6-1a          | ST             | % of day | 76.6 (12.4)%                  | Long-term: (r = 0.532, 95% CI: 0.336, 0.684, p<.001), short-term: r = 0.533 (95%CI: 0.449, 0.607, p<0.001) | Long term = 2.4% (95% CI: -0.5, 5.3, p = 0.091, LoA: -21.2, 25.9), short-term = 2.2% (95% CI: 0.7, 3.6, p = 0.005, LoA: -24.2, 28.5) |
| Gardiner, 2011     | Older adults                       | modified Salmon questionnaire                         | Watching TV, computer, reading, socialising, travel and hobbies, and a summary measure (total ST time) | h/day    | Total ST: 7.3 (1.8)                                             | ActiGraph GT1M | ST             | h/day    | Median: 10.2 (IQR: 9.5, 10.9) | r = 0.30 (95% CI: 0.02, 0.54)                                                                              | -3.6                                                                                                                                 |
| Gennuso, 2015      | Older adults                       | Yale Physical Activity Survey for Older Adults (YPAS) | SBs                                                                                                    | h/day    | NR                                                              | ActiGraph GT1M | ST             | h/day    | 9.2 (1.3)                     | 8.6% agreement between the YPAS and accelerometer-derived SB time                                          | NR                                                                                                                                   |

| First author, year | Population                           | Self-report measure                           |                                                                                                                                 |       |                                                       | Device measure            |                       |         |                                                         | Correlation                                                                            | MD:<br>Self-report – device*                                                              |
|--------------------|--------------------------------------|-----------------------------------------------|---------------------------------------------------------------------------------------------------------------------------------|-------|-------------------------------------------------------|---------------------------|-----------------------|---------|---------------------------------------------------------|----------------------------------------------------------------------------------------|-------------------------------------------------------------------------------------------|
|                    |                                      | Name                                          | Domain or type                                                                                                                  | Units | Mean (SD)*                                            | Name                      | Domain or type        | Units   | Mean (SD)*                                              |                                                                                        |                                                                                           |
|                    |                                      | CHAMPS                                        |                                                                                                                                 |       |                                                       |                           |                       |         |                                                         | r = 0.14, p = 0.28;                                                                    |                                                                                           |
| Gennuso, 2016      | Older adults                         | Modified Salmon questionnaire (Gardiner)      | Watching TV, using computer, reading, socializing, passive travel, doing hobbies, other activities                              | h/day | 9.0 (3.3)                                             | activPAL                  | Sitting/lying         | h/day   | Median: 9.4 (IQR: 8.2, 10.5)                            | r = 0.06, p = 0.72, Lin's concordance coefficient value was 0.07 (95 % CI -0.18, 0.30) | 0.31 (95 % CI: -6.74, 7.37)                                                               |
| Gibbs, 2015        | Overweight & obese young adults      | EARLY Trials Sedentary Behavior Questionnaire | SBs: TV, computer or video games, office work, reading or other recreation, using a phone, and travel-work, computer, paperwork | h/day | Median (IQR): 10.0 (8.1-12.9)                         | SenseWear armband         | ST                    | h/day   | Median (IQR): 9.1 (7.8-10.2)                            | r = 0.21, p<.001                                                                       | 1.1 (95% LoA: -4.9, 11.9)                                                                 |
|                    |                                      | GPAQ                                          | Sitting                                                                                                                         |       | Median (IQR): 8.0 (5.0, 10.0)                         |                           |                       |         |                                                         | r = 0.32, p<.001                                                                       | 0.7 (LoA: -7.8, 5.8)                                                                      |
| Gilbert, 2016      | Patients with Rheumatoid Arthritis   | modified Yale Physical Activity Survey (YPAS) | SBs                                                                                                                             | h/day | 13.00 (2.59)                                          | ActiGraph GT1M            | ST                    | h/day   | 9.86 (1.38)                                             | Pearson r = 0.29 (95% CI: 0.15, 0.42, p<.001)                                          | LoA demonstrated a MD of ± 4.0 h/day                                                      |
| Golubic R, 2014    | Middle-aged men and women            | Recent Physical Activity Questionnaire (RPAQ) | SBs (leisure time, occup., travel, and domestic life)                                                                           | h/day | Total: 12.7 (3.0), women: 12.9 (2.7), men: 13.4 (3.1) | Actiheart                 | ST                    | h/day   | Total: 15.8 (2.3), women: 15.9 (2.2), men: 15.6 (2.6)   | Total: r = 0.20 (95% CI: 0.14, 0.25)                                                   | Total = -3.1 (LoA: -9.6, 4.9), women = -3.0 (LoA: -9.0, 4.1), men = -2.2 (LoA: -8.3, 5.5) |
| Gomersall, 2015    | Adults from an Australian university | MARCA                                         | SBs                                                                                                                             | h/day | 11.00 (2.33)                                          | activPAL                  | Sitting/lying         | h/day   | 10.4 (2.6)                                              | r = 0.77 (95% CI: 0.64, 0.86; p<.001)                                                  | Mean bias = 0.59 (LoA: -2.35, 3.53)                                                       |
| Gordon, 2013       | Adults with sedentary occupations    | IPAQ                                          | Total day sitting                                                                                                               | h/day | All-day sitting: 548.7 (167.2)                        | ActiGraph GT3X & activPAL | ST                    | min/day | ActiGraph: 364.4 (37.3), activPAL at work: 381.6 (52.0) | NR                                                                                     | NR                                                                                        |
|                    |                                      | SBQ                                           | SBs                                                                                                                             |       | Sitting at work: 360.0 (171.7)                        |                           | Sitting/lying at work |         |                                                         |                                                                                        |                                                                                           |

| First author, year | Population          | Self-report measure                                  |                                                            |                    |                                                                | Device measure         |                                      |                    |                                                                                                | Correlation                                                          | MD:<br>Self-report – device*                                                                                                                                                                    |
|--------------------|---------------------|------------------------------------------------------|------------------------------------------------------------|--------------------|----------------------------------------------------------------|------------------------|--------------------------------------|--------------------|------------------------------------------------------------------------------------------------|----------------------------------------------------------------------|-------------------------------------------------------------------------------------------------------------------------------------------------------------------------------------------------|
|                    |                     | Name                                                 | Domain or type                                             | Units              | Mean (SD)*                                                     | Name                   | Domain or type                       | Units              | Mean (SD)*                                                                                     |                                                                      |                                                                                                                                                                                                 |
| Grimm, 2012        | Older adults        | IPAQ-SF                                              | Sitting                                                    | min/day            | Total: 336.4 (184.1); men: 330.7 (218.5), women: 338.4 (171.4) | ActiGraph 7164         | ST                                   | min/day            | Total: 597.2 (96.8), men: 630.6 (94.1), women: 586.4 (95.7)                                    | All: r = 0.042, NS, men: r = 0.051, NS, women: r = 0.050, NS         | Total = 262.0 (LoA: 608.2, -84.2), men = 294.3 (LoA: 664.9, -76.3), women = 250.4 (LoA: 568.8, -86.0)                                                                                           |
| Gupta, 2017        | Blue collar workers | None                                                 | Workday sitting                                            | min/day            | 271.8 (160.5)                                                  | ActiGraph GT3X         | Workday sitting                      | min/day            | 475.8 (138.3)                                                                                  | r = 0.32, p<0.001                                                    | 204.1 (LoA: -139.7, 547.8)                                                                                                                                                                      |
| Haakstad, 2010     | Pregnant women      | physical activity and pregnancy questionnaire (PAPQ) | Daily sitting/lying                                        | min/day            | 1122.2 (111.7)                                                 | ActiReg                | Sitting/lying                        | min/day            | 1117.2 (144.5)                                                                                 | r = 0.288, p = 0.013                                                 | 3.0 (LoA: -309.6, 315.5)                                                                                                                                                                        |
| Hagstromer, 2010   | General population  | IPAQ-LF                                              | Sitting (weekday + weekend)                                | min/day            | All: 590 (208), men: 632 (195), women: 557 (211)               | ActiGraph 7164         | ST                                   | min/day            | All: 466 (87), men: 477 (94), women: 457 (80)                                                  | All r = 0.23, p<0.01, men: r = 0.13, p<0.05, women: r = 0.26, p<0.01 | Sitting MD (SD) = 130 (207), p<.001. Differences (i.e., error) between the IPAQ and ActiGraph scores increased as the min/day in sitting reported in the IPAQ increased (R <sup>2</sup> = 0.50) |
| Hansen, 2014       | General population  | IPAQ-LF                                              | Sitting (weekday + weekend)                                | h/day              | Median (IQR); women: 13.8 (12.0, 16.3); men: 14.4 (12.6, 18.0) | ActiHeart              | ST                                   | h/day              | Median (IQR): women: 15.6 (14.4, 17.1); men: 16.3 (14.6, 17.5)                                 | NR                                                                   | NR                                                                                                                                                                                              |
| Headley, 2018      | College employees   | OSPAQ                                                | Occup. sitting                                             | min/day & % of day | 327.7 (168.3) min/day, 66.2% (21.9%)                           | ActivPAL3              | Sitting (occupational and total day) | min/day & % of day | Total day: 59.4 (9.3)%, 563.1 (96.4) min/day; Occupational: 57.0 (15.7)%, 275.6 (90.0) min/day | NR                                                                   | NR                                                                                                                                                                                              |
| Hekler, 2012       | Older adults (65+)  | CHAMPS                                               | ST (TV, reading, socialize, passive travel, attend events) | min/week           | 1095.7 (486.4)                                                 | ActiGraph 7164 & 71256 | ST                                   | min/week           | NR                                                                                             | r = 0.12, p<.001                                                     | 2841.6 (LoA: -4476.7, -1206.5)                                                                                                                                                                  |
| Herrmann, 2013     | General population  | GPAQ                                                 | Sitting                                                    | min/day            | Low = 547.5 (179.2); moderate = 529.2 (173.4);                 | ActiGraph GT1M         | ST                                   | min/day            | Low = 716.1 (128.5); moderate =                                                                | r = -0.12, NS                                                        | NR                                                                                                                                                                                              |

| First author, year   | Population                                       | Self-report measure |                |          |                                                                     | Device measure          |                |          |                                                                                                              | Correlation                                                                                              | MD:<br>Self-report – device*                                                                  |
|----------------------|--------------------------------------------------|---------------------|----------------|----------|---------------------------------------------------------------------|-------------------------|----------------|----------|--------------------------------------------------------------------------------------------------------------|----------------------------------------------------------------------------------------------------------|-----------------------------------------------------------------------------------------------|
|                      |                                                  | Name                | Domain or type | Units    | Mean (SD)*                                                          | Name                    | Domain or type | Units    | Mean (SD)*                                                                                                   |                                                                                                          |                                                                                               |
|                      |                                                  |                     |                |          | high = 550.7 (166.3)                                                |                         |                |          | 658.5 (106.2); high = 600.8 (88.1)                                                                           |                                                                                                          |                                                                                               |
|                      |                                                  | IPAQ                |                |          | Low = 512.8 (184.4); moderate = 413.2 (167.5); high = 477.7 (169.9) |                         |                |          |                                                                                                              |                                                                                                          |                                                                                               |
| Hoos, 2012           | Adult Latinas                                    | GPAQ                | Sitting        | min/week | 1130.14 (915.49)                                                    | ActiGraph GT1M          | ST             | min/week | 3365.79 (530.43)                                                                                             | r = 0.28, NS                                                                                             | NR                                                                                            |
| Hur, 2019            | Patients with fibrotic interstitial lung disease | IPAQ-LF             | Sitting        | min/day  | Median (IQR): 360 (240-566)                                         | ActiGraph GT3X          | ST             | min/day  | Median (IQR): waist1 = 337 (256, 418) ; waist2 = 294 (219, 389); wrist1 = 54 (37, 96) ; wrist2 = 48 (33, 93) | wrist1 r = 0.10, p = 0.29; wrist2 r = 0.14, p = 0.15; waist1 r = 0.38, p<0.001; waist2 r = 0.40, p<0.001 | NR                                                                                            |
| Hurtig-Wennlof, 2010 | Elderly (65+)                                    | modified IPAQ       | Sitting        | min/day  | Median (IQR): women = 300 (240, 420); men = 420 (300, 600)          | ActiGraph GT1M          | ST             | min/day  | Median (IQR): women = 454 (399, 511); men = 518 (435, 565)                                                   | r = 0.277, p<0.05                                                                                        | NR                                                                                            |
| Hutchison, 2018      | Older adults (with and without fibromyalgia )    | SBQ                 | Total          | min/week | FM = 68 (18), CO = 78 (16)                                          | ActiGraph WGT3X         | ST             | min/day  | FM = 238 (66), CO = 335 (78)                                                                                 | FM: r = -0.13, CO: r = 0.00                                                                              | NR                                                                                            |
| Igelstrom, 2013      | People with obstructive sleep apnea and obesity  | IPAQ                | Sitting        | h/day    | 7h51min (2h59min)                                                   | SenseWear Pro 3 Armband | ST             | h/day    | 9h55min (3h10min)                                                                                            | NR                                                                                                       | 114 (LoA: -362, 590) min/day                                                                  |
|                      |                                                  | Logbook             | Sitting        |          | 8h21min (3h0min)                                                    |                         |                |          |                                                                                                              |                                                                                                          | 86 (LoA: -396, 568) min/day                                                                   |
| Innerd, 2018         | University staff or students                     | IPAQ-SF             | Sitting        | min/day  | BMI normal = 476 (84), overweight = 545 (91), obese = 628 (83)      | ActiGraph GT3X+         | ST             | min/day  | BMI normal = 597 (67), overweight = 704 (73), obese = 823 (94)                                               | r = 0.49, 95% CI: 0.45, 0.53                                                                             | Normal = -121 (LoA: -227, 35), overweight = -159 (LoA: -345, 27), obese = -195 (LoA: -394, 5) |

| First author, year | Population                         | Self-report measure              |                                                                                                                                     |          |                                                                                                               | Device measure             |                |          |                                                                                                               | Correlation                                                                                           | MD:<br>Self-report – device*                                                                                        |
|--------------------|------------------------------------|----------------------------------|-------------------------------------------------------------------------------------------------------------------------------------|----------|---------------------------------------------------------------------------------------------------------------|----------------------------|----------------|----------|---------------------------------------------------------------------------------------------------------------|-------------------------------------------------------------------------------------------------------|---------------------------------------------------------------------------------------------------------------------|
|                    |                                    | Name                             | Domain or type                                                                                                                      | Units    | Mean (SD)*                                                                                                    | Name                       | Domain or type | Units    | Mean (SD)*                                                                                                    |                                                                                                       |                                                                                                                     |
| Ishii, 2018        | Japanese adults                    | NR                               | Work and non-workday ST: passive travel; work; TV, videos and DVDs; computer, cell phone or tablet outside of work; in leisure time | min/day  | Median (IQR) workday = 510.9 (330.0, 684.7); non-workday = 422.2 (301.3, 554.0), total = 506.7 (350.7, 636.4) | Active Style Pro HJA-350IT | ST             | min/day  | Median (IQR) workday = 524.7 (411.8, 614.6); non-workday = 498.4 (410.8, 578.7), total = 512.1 (429.8, 589.0) | Workday $r = 0.57$ , $p < .001$ , non-workday $r = 0.23$ , $p < .001$ , total $r = 0.49$ , $p < .001$ | Work day = -0.4 (LoA: -378.9, 378.1), non-work day = -49.2 (LoA: -477.7, 379.2), total = -13.4 (LoA: -361.9, 335.2) |
| Jancey, 2014       | Office workers                     | OSPAQ                            | Occup. sitting                                                                                                                      | min/week | Occasion 1: 1917.9 (471.6); Occasion 2: 1917.6 (488.1)                                                        | ActiGraph GT3X+            | ST             | min/week | NR                                                                                                            | $r = 0.58$ (95% CI: 0.33, 0.75), $p < .001$                                                           | -25.4 (LoA: -784.7, 733.9)                                                                                          |
| Kim, 2018          | University staff or students       | Sedentary Behavior Record (SBR)  | SBs                                                                                                                                 | NR       | NR                                                                                                            | Autographe r               | SBs            | NR       | NR                                                                                                            | NR                                                                                                    | NR                                                                                                                  |
| Kim, 2017          | General population                 | 24-Hour Physical Activity Recall | SBs                                                                                                                                 | min/day  | Least square means = 450.3 (SE = 4.4)                                                                         | SenseWear                  | ST             | min/day  | least square means = 654.3 (SE = 5.1)                                                                         | $r = 0.45$ , $p < 0.0001$                                                                             | NR                                                                                                                  |
| King, 2016         | Underactive adults                 | EMA                              | Sitting                                                                                                                             | h/day    | 8.5 (2.4)                                                                                                     | Smart phone accelerometer  | ST             | min/day  | 459.5 (86.9)                                                                                                  | NR                                                                                                    | NR                                                                                                                  |
| Knell, 2017        | Community dwelling adults          | EMA                              | SB                                                                                                                                  | min/week | 2320.2 (1998.8)                                                                                               | ActiGraph GT3X             | ST             | min/week | 3400.8 (864.0)                                                                                                | $r = 0.16$ ( $p = 0.03$ ), LCC = 0.07 (95% CI: -0.02, 0.16)                                           | NR                                                                                                                  |
|                    |                                    | NHANES                           | TV + computer weekday + weekend                                                                                                     |          | 2862.3 (1676.4)                                                                                               |                            |                |          |                                                                                                               | $r = 0.07$ ( $p = 0.33$ ), LCC = 0.05 (95% CI: -0.06, 0.16)                                           |                                                                                                                     |
|                    |                                    | IPAQ                             | Sitting                                                                                                                             |          | 2897.1 (1559.6)                                                                                               |                            |                |          |                                                                                                               | $r = 0.08$ ( $p = 0.27$ ), LCC = 0.06 (95% CI: -0.05, 0.18)                                           |                                                                                                                     |
| Kohler, 2017       | Healthy, community dwelling adults | cpar24                           | SBs                                                                                                                                 | min/24-h | median = 980                                                                                                  | ActiGraph GT3X             | ST             | min/24-h | median = 1004                                                                                                 | $r = 0.54$                                                                                            | Median diff = 7, $p = 0.39$ , MD = -31 (LoA: -380, 319)                                                             |



| First author, year    | Population                                       | Self-report measure                                  |                                                                     |                        |                                                                             | Device measure           |                                  |                |                                                                                                                                                                                   | Correlation                                                                                                         | MD:<br>Self-report – device*                                                   |
|-----------------------|--------------------------------------------------|------------------------------------------------------|---------------------------------------------------------------------|------------------------|-----------------------------------------------------------------------------|--------------------------|----------------------------------|----------------|-----------------------------------------------------------------------------------------------------------------------------------------------------------------------------------|---------------------------------------------------------------------------------------------------------------------|--------------------------------------------------------------------------------|
|                       |                                                  | Name                                                 | Domain or type                                                      | Units                  | Mean (SD)*                                                                  | Name                     | Domain or type                   | Units          | Mean (SD)*                                                                                                                                                                        |                                                                                                                     |                                                                                |
| Kozey-Keadle, 2012    | Overweight, non-exercising office workers        | IPAQ-SF                                              | Sitting                                                             | h/day                  | Weekday = 9.3 (3.3), weekend = 6.2 (3.1)                                    | activPAL, ActiGraph GT3X | activPAL: sitting, ActiGraph: ST | % of wear time | activPAL: weekday = 68.8 (8.5), weekend = 60.4 (15.6), ActiGraph 100cpm weekday = 66.4 (10.2), weekend = 62.7 (8.9); ActiGraph 150 cpm weekday = 70.5 (9.4), weekend = 66.7 (9.0) | Weekdays: r = 0.41, ns; weekend: r = 0.55, p<0.05                                                                   | Weekday = 40.5 (95% CI: -125.2, 22.3), weekend = 147.1 (95% CI: -228.3, -66.6) |
|                       |                                                  | Domain-Specific Questionnaire (D-SQ)                 | Travel, TV, occup., computer at home, leisure time not including TV | 12.6 (2.9), 12.1 (5.0) | Weekdays: r = 0.30, ns, weekends: r = 0.17, ns                              |                          |                                  |                |                                                                                                                                                                                   | Weekday = 176 (95% CI: 96.1, 256.9), weekend = 157.6 (95% CI: 22.1, 293.0)                                          |                                                                                |
| Kozo, 2012            | Community dwelling adults                        | IPAQ-LF                                              | Sitting                                                             | min/day                | 364.9 (95% CI: 357.5, 372.4)                                                | ActiGraph 7164 & 71256   | ST                               | min/day        | 499.6 (95% CI: 495.1, 504.1)                                                                                                                                                      | NR                                                                                                                  | NR                                                                             |
| Laeremans, 2017       | Healthy adults                                   | GPAQ                                                 | Sitting                                                             | min/day                | Median = 535 (IQR: 420-635)                                                 | SenseWear                | ST                               | min/day        | Median (IQR) = 550 (481, 653)                                                                                                                                                     | r = 0.09                                                                                                            | % difference median (IQR) = 8 (-12, 30), MD = 8 (LoA: -75, 92)                 |
| Lagersted-Olsen, 2014 | Office workers                                   | New questions - unnamed but based on IPAQ and MOSPAQ | Occup. sitting                                                      | h/day                  | Working hours = 5.6 (1.5), leisure time on workday = 3.1, leisure day = 4.6 | ActiGraph GT3X+          | ST                               | h/day          | Working hours = 5.6 (1.1), leisure time on a work day = 3.5, leisure day = 7.0                                                                                                    | Working hours r = 0.081, p = 0.699, leisure time on workday r = -0.185, p = 0.366, leisure day r = 0.100, p = 0.626 | Work hours = 0 (LoA: -3.4, 3.4), leisure day = 2.4 (LoA: -7.8, 3.0)            |
| Larsson, 2019         | Validity = office workers, reliability = seniors | SED-GIH                                              | Sitting                                                             | h/day                  | N/A - categorical response options                                          | activPAL3 micro          | Sitting time                     | h/day          | 9.7 (1.4)                                                                                                                                                                         | r = 0.31, kappa = 0.12                                                                                              | NR                                                                             |
| Legge, 2017           | Patients with systemic lupus erythematosus       | Framingham Physical Activity Index                   | SBs                                                                 | min/day                | SLE = 387.0 (233.2), RA = 416.8 (233.6), health = 468.0 (221.6)             | ActiGraph GT3X+          | ST                               | min/day        | SLE = 603.6 (68.7), RA = 603.4 (72.5), healthy = 618.0 (93.5)                                                                                                                     | NR                                                                                                                  | NR                                                                             |
| Lewis, 2016           | Older adults                                     | MARCA                                                | SBs                                                                 | min/day                | 559.2 (137.4)                                                               | activPAL3                | Sitting                          | min/day        | 534.1 (114.1)                                                                                                                                                                     | NR                                                                                                                  | NR                                                                             |
| Lewis, 2018           | Older cancer survivors and adults at             | IPAQ - LF                                            | Sitting                                                             | min/week               | All = 3025 (1392), men = 3193 (1514),                                       | ActiGraph GT3X           | ST                               | min/week       | all = 3919 (1380), men = 4051 (805),                                                                                                                                              | r = 0.33, p<0.05, men r = 0.40, p<0.05, women r = 0.11, NS                                                          | % difference = 48.98%                                                          |

| First author, year    | Population                          | Self-report measure            |                                                                                 |          |                                                          | Device measure   |                |          |                                                              | Correlation                                                         | MD:<br>Self-report – device*                                                     |
|-----------------------|-------------------------------------|--------------------------------|---------------------------------------------------------------------------------|----------|----------------------------------------------------------|------------------|----------------|----------|--------------------------------------------------------------|---------------------------------------------------------------------|----------------------------------------------------------------------------------|
|                       |                                     | Name                           | Domain or type                                                                  | Units    | Mean (SD)*                                               | Name             | Domain or type | Units    | Mean (SD)*                                                   |                                                                     |                                                                                  |
|                       | risk of cancer                      |                                |                                                                                 |          | women = 2742 (1139)                                      |                  |                |          | women = 3708 (757)                                           |                                                                     |                                                                                  |
| Libertine, 2011       | Overweight and obese office workers | Sitting Questionnaire          | Sitting                                                                         | h/day    | NR                                                       | activPAL         | Sitting/lying  | h/day    | NR                                                           | Weekday r = 0.22, weekend r = 0.34                                  | Weekday = 2.8 (95% CI: 1.9, 3.6), weekend = 3.0 (95% CI: 1.1, 4.9)               |
|                       |                                     | Focus Questionnaire            |                                                                                 |          |                                                          |                  |                |          |                                                              | Weekday r = 0.10, weekend r = 0.42                                  | Weekday = -0.91 (95% CI: -2.1, 0.30), weekend = -1.8 (95% CI: -3.0, -0.58)       |
| Lopez-Rodriguez, 2017 | Healthy elderly                     | EXERNET Questionnaire          | Sitting                                                                         | h/day    | 4.21 (1.33); men = 3.91 (1.04); women = 3.73 (1.18)      | ActiGraph GT1M   | ST             | min/day  | 394.98 (83.98); men = 425.23 (94.97); women = 389.61 (81.55) | All r = 0.574, p<0.01; men r = 0.63, p<0.05; women r = 0.57, p<0.01 | NR                                                                               |
| Loprinzi, 2013        | Healthy young adults                | SBQ                            | ST                                                                              | min/day  | 421.2 (95% CI: 384, 457)                                 | ActiGraph GT1M   | ST             | min/day  | 518.3 (95% CI: 497, 539)                                     | NR                                                                  | NR                                                                               |
| Lucas, 2013           | College freshmen                    | IPAQ-LF                        | Sitting                                                                         | h/day    | NR                                                       | activPAL         | Sitting/lying  | h/day    | NR                                                           | r = 0.33, p<.05                                                     | Weekday = -3.14, weekend = -4.36                                                 |
| Mader, 2006           | Middle-aged women & men             | IPAQ-SF                        | Sitting                                                                         | min/week | 2603 (1397)                                              | ActiGraph AM7164 | ST             | min/week | 3852 (629)                                                   | NR                                                                  | NR                                                                               |
| Maher, 2017           | Community-dwelling older adults     | Daily diary                    | Sitting/lying time                                                              | min/day  | 636.6 (219.9)                                            | activPAL         | Sitting/lying  | min/day  | 573.7 (145)                                                  | NR                                                                  | NR                                                                               |
| Marmeleira, 2013      | Adults who are blind                | IPAQ-SF                        | Sitting                                                                         | h/day    | 6.16 (2.42)                                              | ActiGraph GT1M   | ST             | h/day    | 10.63 (1.5)                                                  | r = 0.36, p<0.01                                                    | -4.47 (LoA: -8.99, 0.06)                                                         |
| Marshall, 2010        | Middle-aged women & men             | Marshall Sitting Questionnaire | Sitting (travel, work, TV, computer, leisure)                                   | min/day  | NR                                                       | ActiGraph GT1M   | ST             | NR       | NR                                                           | NR                                                                  | Women: weekday = -63.6 (LoA: -395.6, 268.4), weekend = 10.8 (LoA: -398.0, 419.7) |
| Marshall, 2015        | Community-dwelling older adults     | Modified SBQ                   | ST (TV watching, computer/internet use, reading, socializing, driving or using) | h/day    | Total = 11.4 (4.9), women = 11.6 (5.0), men = 11.1 (4.6) | ActiGraph GT3X+  | ST             | h/day    | Total = 9.4 (1.5), women = 9.2 (1.1), men = 9.9 (1.2)        | r = 0.22 (95% CI: 0.09, 0.34), CCC = 0.08 (95% CI: 0.02, 0.15)      | 2.06, p = 0.048                                                                  |

| First author, year | Population         | Self-report measure                                                                   |                                                                                          |                                |                                                                                                                                                                                                                                                                                                                                                                                                                                                                                 | Device measure |                |                |                                                                                                                               | Correlation                                                                                                                                                                                                                                                                                                                                                     | MD:<br>Self-report – device*                                                                                                                                                                       |
|--------------------|--------------------|---------------------------------------------------------------------------------------|------------------------------------------------------------------------------------------|--------------------------------|---------------------------------------------------------------------------------------------------------------------------------------------------------------------------------------------------------------------------------------------------------------------------------------------------------------------------------------------------------------------------------------------------------------------------------------------------------------------------------|----------------|----------------|----------------|-------------------------------------------------------------------------------------------------------------------------------|-----------------------------------------------------------------------------------------------------------------------------------------------------------------------------------------------------------------------------------------------------------------------------------------------------------------------------------------------------------------|----------------------------------------------------------------------------------------------------------------------------------------------------------------------------------------------------|
|                    |                    | Name                                                                                  | Domain or type                                                                           | Units                          | Mean (SD)*                                                                                                                                                                                                                                                                                                                                                                                                                                                                      | Name           | Domain or type | Units          | Mean (SD)*                                                                                                                    |                                                                                                                                                                                                                                                                                                                                                                 |                                                                                                                                                                                                    |
|                    |                    |                                                                                       | motorized travel, doing hobbies, office or volunteer work, napping, and other behaviors) |                                |                                                                                                                                                                                                                                                                                                                                                                                                                                                                                 |                |                |                |                                                                                                                               |                                                                                                                                                                                                                                                                                                                                                                 |                                                                                                                                                                                                    |
| Matsuo, 2016       | Workers            | Workers' Sitting-and Walking-Time Questionnaire (WSWQ)                                | Occup. sitting, leisure sitting, non-workday sitting                                     | min/day, percentage/day method | Median (IQR) Time 1 work sitting: T-method: 428 (360, 510), P-method: 496 (404, 574); non-work time sitting: T-method = 200 (120, 240), P-method = 202 (132, 284); non-work day sitting: T-method = 480 (300, 660), P-method = 576 (408, 683). Time 2 work sitting: T-method: 420 (330, 490), P-method: 470 (360, 540); non-work time sitting: T-method = 180 (120, 240), P-method = 215 (132, 264); non-work day sitting: T-method = 600 (300, 660), P-method = 603 (315, 714) | activPAL       | Sitting/lying  | min/day, %/day | Median (IQR) Time 1 work sitting: ActivPAL: 412 (352-502); non-work sitting 184 (137-230), non-workday sitting 590 (495-677). | Time 1 (pre-activPAL): work time r = 0.52 (time) & 0.59 (%); non-work time r = 0.55 (time) & 0.57 (%); non-workday r = 0.25 (time) & 0.42 (%) (All sig. at p<0.05 except non-workday time method). Time 2 (post-activPAL): work time r = 0.56 (time) & 0.65 (%); non-work time r = 0.51 (time) & 0.60 (%); non-work day r = 0.37 (time) & 0.53 (%) (all p<0.05) | Time 1: work time sitting MD time method = -7 (LoA: -254, 241), P-method = 35 (LoA: -200, 269). Non-workday sitting mean diff time method = -115 (LoA: -588, 358), P-method = -56 (LoA: -392, 281) |
| Matsuzaki, 2016    | General population | Andhra Pradesh Children and Parent Study Physical Activity Questionnaire (APCAPS-PAQ) | Multiple SBs                                                                             | min/day                        | All = 847 (206), men = 791 (188), women = 916 (207)                                                                                                                                                                                                                                                                                                                                                                                                                             | Actiheart      | ST             | min/day        | NR                                                                                                                            | r = 0.26 (p<0.001), men r = 0.08 (p = 0.37), women r = 0.35, p<0.001                                                                                                                                                                                                                                                                                            | mean bias = -48 (SE = 14.6), men = -68 (SE = 20.4), women = -23 (SE = 20.5)                                                                                                                        |

| First author, year | Population                                        | Self-report measure                                          |                              |         |                                                                                                                  | Device measure            |                             |         |                                                                                                                            | Correlation                                                                                                                                     | MD:<br>Self-report – device*                                   |
|--------------------|---------------------------------------------------|--------------------------------------------------------------|------------------------------|---------|------------------------------------------------------------------------------------------------------------------|---------------------------|-----------------------------|---------|----------------------------------------------------------------------------------------------------------------------------|-------------------------------------------------------------------------------------------------------------------------------------------------|----------------------------------------------------------------|
|                    |                                                   | Name                                                         | Domain or type               | Units   | Mean (SD)*                                                                                                       | Name                      | Domain or type              | Units   | Mean (SD)*                                                                                                                 |                                                                                                                                                 |                                                                |
| Matthews, 1995     | University students                               | Physical Activity Log (PAL)                                  | ST                           | min/day | 538.3 (113.3)                                                                                                    | Tritrac R3D               | ST                          | min/day | 753.7 (90.5)                                                                                                               | NR                                                                                                                                              | NR                                                             |
| Matthews, 2013     | Middle-aged women & men                           | Previous Day Recall (PDR)                                    | ST                           | h/day   | All = 10.1 (2.91), men = 9.88 (3.21), women = 9.94 (2.51)                                                        | activPAL, ActiGraph GT3X+ | Sitting/lying, ST           | h/day   | activPAL: 9.0 (1.90), men 9.16 (2.09), women 9.19 (1.91), ActiGraph: 9.1 (1.71) men                                        | activPAL vs. PDR: men $r = 0.67$ , women $r = 0.34$                                                                                             | Men = 0.72 (LoA: -2.61, 4.05), women = 0.75 (LoA: -2.21, 3.71) |
| Matthews, 2018     | General population                                | AARP questionnaire                                           | ST                           | h/day   | 8.0 (3.3)                                                                                                        | activPAL, ActiGraph GT3X+ | Sitting/lying, ST           | h/day   | activPAL: 9.8 (1.8), men = 10.2 (1.7), women = 9.4 (1.7), ActiGraph (100 cpm) = 9.7 (1.6), ActiGraph (200 cpm) = 8.0 (1.7) | NR                                                                                                                                              | -1.8 (3.5)                                                     |
|                    |                                                   | 24-hour recall (ACT24)                                       |                              |         | 9.9 (2.2)                                                                                                        |                           |                             |         |                                                                                                                            |                                                                                                                                                 | 0.1 (2.0)                                                      |
| Matthews, 2011     | Adults with intellectual disabilities             | IPAQ-SF                                                      | Sitting                      | h/day   | 9.36 h (3.21)                                                                                                    | ActiGraph GT1M            | ST                          | h/day   | 10.17 (SD, 2.06)                                                                                                           | NR                                                                                                                                              | -0.81 (SD = 3.80, LoA: -8.41, 6.79)                            |
| Matton, 2007       | Employed/unemployed adults, retired adults        | Flemish Physical Activity Computerized Questionnaire (FPACQ) | TV                           | h/week  | Unemployed/employed men = 17.52 (9.07), women = 12.85 (7.39). Retired: men = 22.33 (11.43); women = 18.06 (9.50) | Triaxial RT3              | TV time (overlaid from log) | h/week  | Unemployed/employed men = 19.54 (11.90), women = 15.76 (8.14). Retired: men = 29.15 (14.53); women = 21.76 (10.84)         | Unemployed/employed men = 0.69 ( $p < 0.001$ ), women = 0.83 ( $p < 0.001$ ). Retired: men = 0.78 ( $p < 0.001$ ); women = 0.80 ( $p < 0.001$ ) | NR                                                             |
| Mazzoni, 2017      | Breast cancer patients                            | Log book                                                     | ST                           | min/day | 517 (185), 95% CI: 494, 540                                                                                      | SenseWear Armband Mini    | ST                          | min/day | 713 (128), 95% CI: 697, 729                                                                                                | $r = 0.40$ ( $p < .01$ )                                                                                                                        | -196 (LoA: $\pm 408$ )                                         |
| McNeil, 2018       | Post-menopausal women                             | SIT-Q                                                        | Total, occup. and leisure ST | h/day   | High = 10.7 (3.6), moderate = 11.0 (3.4)                                                                         | ActiGraph GT3X+           | ST                          | h/day   | High = 8.7 (1.5), moderate = 8.9 (1.6)                                                                                     | NR                                                                                                                                              | NR                                                             |
| Melville, 2011     | adults with intellectual disabilities and obesity | IPAQ-S                                                       | Sitting                      | min/day | 557.4 (189.4)                                                                                                    | ActiGraph GT1M            | ST                          | min/day | 612.0 (121.75)                                                                                                             | NR                                                                                                                                              | NR                                                             |

| First author, year   | Population                            | Self-report measure                                       |                                        |          |                                                                               | Device measure    |                |          |                                                                               | Correlation                                                                                                | MD:<br>Self-report – device*                                                         |
|----------------------|---------------------------------------|-----------------------------------------------------------|----------------------------------------|----------|-------------------------------------------------------------------------------|-------------------|----------------|----------|-------------------------------------------------------------------------------|------------------------------------------------------------------------------------------------------------|--------------------------------------------------------------------------------------|
|                      |                                       | Name                                                      | Domain or type                         | Units    | Mean (SD)*                                                                    | Name              | Domain or type | Units    | Mean (SD)*                                                                    |                                                                                                            |                                                                                      |
| Menezes, 2017        | People who are deaf                   | IPAQ-S                                                    | Sitting                                | h/day    | 7.6 (2.7)                                                                     | ActiGraph GT1M    | ST             | h/day    | 10.1 (1.6)                                                                    | r = 0.13 (NS)                                                                                              | -2.56 (LoA: -8.21, 3.09)                                                             |
| Mensah, 2016         | Healthy general population            | STAQ                                                      | Total sitting, occup., travel, leisure | h/week   | Total sitting = 46.5 (23.2)                                                   | ActiGraph GT3X+   | ST             | h/week   | NR                                                                            | Total r = 0.54, p<.0001, work: r = 0.88, p<.0001, transport r = 0.35, p =0.001, leisure r = 0.19, p = 0.09 | Total sitting = -17 (LoA: -43.8, 34.6), work = 2.6, transport = -1.4, leisure = 17.6 |
| Metcalfe, 2018       | General population                    | GPAQ                                                      | Sitting                                | min/day  | Training = 332.7 (208.0), testing = 363.2 (210.4), validation = 294.9 (201.0) | ActiGraph GT9X    | ST             | min/day  | Training = 535.1 (117.8), testing = 574.6 (154.4), validation = 510.7 (211.1) | NR                                                                                                         | NR                                                                                   |
| Meyer, 2015          | Patients with depression              | IPAQ                                                      | Sitting                                | min/day  | 546.5 (212.3)                                                                 | ActiGraph GT3X+   | ST             | min/day  | 692.6 (93.5)                                                                  | r = 0.550, p = 0.005                                                                                       | NR                                                                                   |
| Moran, 2016          | Older adults                          | IPAQ-SF                                                   | Sitting                                | h/day    | Assisted living: 10.5 (1.3), independent living: 10.0 (2.1)                   | SenseWear Armband | ST             | h/day    | Assisted living: , independent living:                                        | NR                                                                                                         | -269 min/day (LoA: -535, -3)                                                         |
| Moss, 2018           | People with intellectual disabilities | IPAQ-SF (proxy reported by caregivers)                    | Sitting                                | NR       | NR                                                                            | ActiHeart         | ST             | MET/min  | NR                                                                            | r = 0.31, p = 0.04                                                                                         | 740.0 (SD=0.02) and 62.65 (SD=0.01)                                                  |
| Mumu, 2017           | Healthy adults                        | GPAQ                                                      | Sitting                                | min/day  | Median (IQR) = 120 (60; 180)                                                  | ActiGraph GT3X+   | ST             | min/day  | Mean (SD) = 551.15 (83.03), median (IQR) = 546.03 (494.73; 607.05)            | r = 0.23, p <.001                                                                                          | Urban = -419.63 (LoA: -659.55, -179.71), rural = -415.0 (LoA: -577.02, -252.98)      |
| Murillo-Rabago, 2010 | Healthy adults                        | IPAQ-SF & IPAQ-LF                                         | Sitting                                | NR       | NR                                                                            | ActiGraph GT1M    | ST             | NR       | NR                                                                            | IPAQ-SF r = 0.30, p=0.05; IPAQ-LF r = 0.33, p<0.03                                                         | NR                                                                                   |
| O'Neill, 2017        | Patients with Bronchiectasis          | IPAQ-LF                                                   | Sitting                                | min/day  | 362 (115)                                                                     | ActiGraph GT3X    | ST             | min/day  | 634 (77)                                                                      | NR                                                                                                         | -160 (SD=171, LoA: 175, -495)                                                        |
| Oostdam, 2013        | Overweight and obese pregnant women   | Activity Questionnaire for Adults and Adolescents (AQuAA) | SBs                                    | min/week | Median (min, max) = 2460 (0, 6780)                                            | Actitrainer       | ST             | min/week | Median (min, max) = 4361 (2984, 5717)                                         | r = 0.23                                                                                                   | NR                                                                                   |

| First author, year | Population                          | Self-report measure                             |                                                  |                   |                                                                                                    | Device measure       |                                                  |                   |                                                                                                    | Correlation                                                                                                                 | MD:<br>Self-report – device*                                           |
|--------------------|-------------------------------------|-------------------------------------------------|--------------------------------------------------|-------------------|----------------------------------------------------------------------------------------------------|----------------------|--------------------------------------------------|-------------------|----------------------------------------------------------------------------------------------------|-----------------------------------------------------------------------------------------------------------------------------|------------------------------------------------------------------------|
|                    |                                     | Name                                            | Domain or type                                   | Units             | Mean (SD)*                                                                                         | Name                 | Domain or type                                   | Units             | Mean (SD)*                                                                                         |                                                                                                                             |                                                                        |
| Otten, 2010        | Overweight and obese adults         | None                                            | TV                                               | h/day             | 4.3 (1.3)                                                                                          | TV monitoring device | TV time                                          | h/day             | 4.9 (2.6)                                                                                          | r = 0.54, p<0.001                                                                                                           | -0.6                                                                   |
| Oviedo-Caro, 2018  | Pregnant women                      | SBQ                                             | SBs                                              | h/day             | Average = 8.7 (3.5), weekday = 8.8 (3.9), weekend = 8.7 (3.6)                                      | SenseWear            | ST                                               | h/day             | Average = 10.0 (2.1), weekday = 10.1 (2.3), weekend = 9.9 (2.4)                                    | Weekday = r = 0.23 (p = 0.001), average = 0.20 (p = 0.008), weekend = (r = 0.12, p = 0.103)                                 | Weekday = -1.33 (3.99), weekend = -1.20 (4.07), average = -1.29 (3.74) |
| Oyeyemi, 2014      | General population                  | Hausa IPAQ-SF                                   | Sitting (weekday)                                | min/day           | Total = 230 (136), men = 210 (133), women = 260 (137)                                              | ActiGraph 7164       | ST                                               | min/day           | Total = 409 (102), men = 405 (109), women = 415 (91)                                               | All = 0.06, men = -0.08, women = 0.14, all NS                                                                               | 2180 (p = 0.13, 95% LoA = 2510, 150)                                   |
| Pedersen, 2016     | Desk-based workers                  | OSPAQ                                           | Occup. sitting                                   | % of workday      | 62.56% (22.61%)                                                                                    | activPAL             | Sitting                                          | % of workday      | 65.72% (21.76)                                                                                     | r = 0.90                                                                                                                    | Bias = -3.16 % (SD = 9.32 %, LoA = -21.4, 15.1 )                       |
| Pediscic, 2014     | Desk-based workers                  | Workplace Sitting Breaks Questionnaire (SITBRQ) | Duration and frequency of sitting breaks at work | breaks/h, min/day | NR                                                                                                 | ActiGraph GT1M       | Duration and frequency of sitting breaks at work | breaks/h, min/day | NR                                                                                                 | Frequency of breaks (breaks/hour) 0.24 (95% CI: 0.07 - 0.40). Total duration of breaks (min/day) 0.05 (95% CI: -0.12, 0.22) | NR                                                                     |
| Peters, 2010       | Urban adults                        | Past Year Physical Activity Questionnaire       | SBs                                              | min/day           | Median (IQR): all = 344.8 (248.3, 466.3), men = 356.7 (271.9, 496.6), women = 325.1 (241.7, 433.5) | ActiGraph 7164       | ST                                               | min/day           | Median (IQR): all = 507.8 (448.6, 568.1), men = 517.4 (462.0, 584.4), women = 498.3 (437.5, 556.5) | r = 0.16, p<.001                                                                                                            | -152.3 (95% CI: -166.2, -138.4, LoA: -484.0, 179.4)                    |
| Pinto, 2017        | Breast cancer survivors             | 7-d PAR                                         | Sitting                                          | min/week          | 3258.08 (1030.33)                                                                                  | ActiGraph GT3X       | ST                                               | min/week          | 4612.07 (760.72)                                                                                   | r = 0.37, p = 0.002                                                                                                         | NR                                                                     |
| Powell, 2011       | Overweight/ obese Latina immigrants | GPAQ                                            | Sitting                                          | NR                | NR                                                                                                 | NR                   | ST                                               | NR                | NR                                                                                                 | r = 0.09, p = 0.60                                                                                                          | NR                                                                     |
| Prince, 2018       | Nurses                              | IPAQ-SF                                         | Sitting                                          | min/day           | 301 (192)                                                                                          | ActiGraph GT3X+      | ST                                               | min/day           | 445 (109)                                                                                          | r = 0.43, p<.001                                                                                                            | NR                                                                     |
|                    |                                     | SBQ                                             | SBs                                              |                   | 365 (178)                                                                                          |                      |                                                  |                   |                                                                                                    | r = 0.31, p < 0.001                                                                                                         |                                                                        |
| Prince SA, 2019    | Cardiac rehabilitation patients     | IPAQ-SF                                         | Sitting                                          | min/day           | 487.5 (193.2)                                                                                      | ActivPAL3            | Sitting + lying                                  | min/day           | 497.3 (107.9)                                                                                      | r = 0.05, P = 0.79;                                                                                                         | 9.7 (95% CI: -67.7, 87.2, p = 0.800)                                   |

| First author, year | Population                             | Self-report measure   |                |                                                  |                                                                                                                                               | Device measure |                |          |                                                                | Correlation                                   | MD:<br>Self-report – device*         |
|--------------------|----------------------------------------|-----------------------|----------------|--------------------------------------------------|-----------------------------------------------------------------------------------------------------------------------------------------------|----------------|----------------|----------|----------------------------------------------------------------|-----------------------------------------------|--------------------------------------|
|                    |                                        | Name                  | Domain or type | Units                                            | Mean (SD)*                                                                                                                                    | Name           | Domain or type | Units    | Mean (SD)*                                                     |                                               |                                      |
| Rees-Punia, 2019   | General population                     | 7-day diary           | Sitting        | min/day                                          | Total = 557.3 (135.3), women = 540.8 (126.7), men = 581.3 (144.0)                                                                             | ActiGraph GT3X | ST             | min/day  | Total = 579.7 (96.7), men = 597.4 (95.9), women = 567.5 (95.5) | r = 0.56 (95% CI: 0.51, 0.61)                 | NR                                   |
|                    |                                        | Sitting questionnaire |                |                                                  | Total = 450.7 (173.2), women = 453.7 (180.4), men = 446.2 (162.2)                                                                             |                |                |          |                                                                | r = 0.41 (95% CI: 0.35, 0.47)                 |                                      |
| Riviere, 2018      | General population                     | GPAQ (French)         | Sitting        | min/day                                          | 588.6 (146.4)                                                                                                                                 | ActiGraph GT3X | ST             | min/day  | 843.6 (134.5)                                                  | r = 0.42, p < 0.01                            | 251.2 (SD = 161.1, LoA: 90.1, 412.3) |
| Roman-Viñas, 2010  | General population                     | IPAQ-LF               | Sitting        | min/day                                          | 373.1 (184.3)                                                                                                                                 | ActiGraph MTI  | ST             | min/day  | 481.9 (121.1)                                                  | r = 0.34, p < .05                             | NR                                   |
| Rosenberg, 2010    | validity = overweight men & women      | SBQ                   | SBs            | Total = h/week, weekday/weekend-specific = h/day | Total: women = 64.6 (26.7), men = 66.6 (24.9), weekday: women = 10.3 (4.6), men = 9.0 (3.9), weekend day: women = 8.8 (3.9), men = 10.8 (4.0) | ActiGraph 7164 | ST             | NR       | NR                                                             | Men: r = -0.01 (0.81), women: r = 0.10 (0.07) | NR                                   |
| Rosenberg, 2016    | Older adults in retirement communities | SBQ                   | SBs            | h/day                                            | 11.0 (4.9)                                                                                                                                    | ActiGraph GT3X | ST             | h/day    | 8.6 (1.0)                                                      | NR                                            | NR                                   |
| Rosenberg, 2015    | Overweight and obese older adults      | IPAQ-LF               | Sitting        | h/day                                            | Weekday = 8.38 (2.54), weekend day = 7.48 (2.50)                                                                                              | activPAL       | Sitting        | h/day    | 9.22 (1.70)                                                    | NR                                            | NR                                   |
| Ruiz-Casado, 2016  | Spanish cancer survivors               | IPAQ-SF               | Sitting        | min/week                                         | 1793 (914)                                                                                                                                    | ActiGraph GT3X | ST             | min/week | 3583 (1065)                                                    | r = 0.07                                      | -1824 (SD = 1308, LoA: -4367, 739)   |
|                    |                                        | GPAQ                  |                |                                                  | 1635 (947)                                                                                                                                    |                |                |          |                                                                | r = 0.17                                      |                                      |
| Ruiz-Casado, 2015  | Spanish cancer survivors               | IPAQ-SF               | Sitting        | min/day                                          | NR                                                                                                                                            | ActiGraph GT3X | ST             | min/day  | NR                                                             | r = 0.29                                      | -297                                 |

| First author, year   | Population                                | Self-report measure                                          |                                                                                 |         |                                                                                                                     | Device measure     |                |         |                                                                                                                | Correlation                                     | MD:<br>Self-report – device*           |
|----------------------|-------------------------------------------|--------------------------------------------------------------|---------------------------------------------------------------------------------|---------|---------------------------------------------------------------------------------------------------------------------|--------------------|----------------|---------|----------------------------------------------------------------------------------------------------------------|-------------------------------------------------|----------------------------------------|
|                      |                                           | Name                                                         | Domain or type                                                                  | Units   | Mean (SD)*                                                                                                          | Name               | Domain or type | Units   | Mean (SD)*                                                                                                     |                                                 |                                        |
| Ryan, 2014           | General population                        | Health Survey for England                                    | Sitting                                                                         | min/day | Middle-aged/<br>include: 603 (272), excluded:<br>609 (310),<br>older/included:<br>754 (293),<br>excluded: 814 (351) | ActiGraph GT1M     | ST             | min/day | Middle-aged/<br>included: 576 (86), excluded:<br>581 (98), older/<br>included: 613 (83), excluded:<br>619 (88) | NR                                              | NR                                     |
| Ryan, 2018           | Community dwelling older adults           | IPAQ-LF                                                      | Sitting                                                                         | h/week  | 39.7 (14.9)                                                                                                         | GeneActiv Original | ST             | h/week  | 67.3 (10.5)                                                                                                    | r = 0.29                                        | NR                                     |
| Ryde, 2017           | Women attending Bingo club                | Marshall Sitting Questionnaire                               | Total sitting: travel + work + TV + home computer + leisure time (excluding TV) | h/day   | Weekday = 7.7 (3.6), weekend day = 8.0 (3.6)                                                                        | ActiGraph GT3X     | ST             | h/day   | 9.6 (1.7)                                                                                                      | NR                                              | NR                                     |
| Sasaki, 2018         | People with Multiple Sclerosis            | Marshall Sitting Questionnaire                               | Total sitting: travel + work + TV + home computer + leisure time (excluding TV) | min/day | 652.7 (258.0) adjusted for 12h                                                                                      | ActiGraph GT3X     | ST             | min/day | 493.7 (64.2) adjusted for 12h                                                                                  | r = 0.34, p<.01                                 | Mean bias = 80.54 (LoA: -410.5, 571.5) |
| Schaller, 2016       | Low back pain patients & healthy controls | GPAQ                                                         | Sitting                                                                         | min/day | 454 (214)                                                                                                           | ActiGraph GT3X     | ST             | min/day | 577 (103)                                                                                                      | NR                                              | -122.2 (LoA: -502.5, 258.1)            |
| Scheers, 2012        | Workers                                   | Flemish physical activity computerized questionnaire (FPACQ) | Sitting                                                                         | h/week  | 37.85 (16.65)                                                                                                       | SenseWear Pro 3    | ST             | h/week  | 62.86 (12.61)                                                                                                  | r = 0.54, p<.001                                | -25.01                                 |
| Segura-Jimenez, 2013 | Women with fibromyalgia                   | IPAQ-LF                                                      | Sitting, Sitting + travel                                                       | min/day | sitting = 319 (171), sitting + travel = 359 (195)                                                                   | SenseWear Pro 3    | ST             | min/day | 907 (136)                                                                                                      | Sitting: r = -0.12, sitting + travel: r = -0.11 | NR                                     |
| Shadyab, 2017        | Older women                               | No name                                                      | ST (sitting + lying)                                                            | h/day   | 8.6 (4.3)                                                                                                           | ActiGraph GT3X     | ST             | h/day   | 9.2 (SD, 1.5)                                                                                                  | NR                                              | NR                                     |



| First author, year  | Population                         | Self-report measure                                            |                                                                                  |         |                                                      | Device measure           |                  |         |                                                                                             | Correlation                                                                                                | MD:<br>Self-report – device* |
|---------------------|------------------------------------|----------------------------------------------------------------|----------------------------------------------------------------------------------|---------|------------------------------------------------------|--------------------------|------------------|---------|---------------------------------------------------------------------------------------------|------------------------------------------------------------------------------------------------------------|------------------------------|
|                     |                                    | Name                                                           | Domain or type                                                                   | Units   | Mean (SD)*                                           | Name                     | Domain or type   | Units   | Mean (SD)*                                                                                  |                                                                                                            |                              |
| Shuval, 2014        | Primary care patients              | Rapid Assessment Disuse Index (RADI)                           | Sitting (home/work, TV/ videos/ DVDs, computer at home/work, eating meals, etc.) | NR      | NR                                                   | ActiGraph GT3X           | ST               | NR      | NR                                                                                          | Past week (controlling for wear time) = 0.291, p<0.01, past month = 0.189, p<.05, past year = 0.245, p<.01 | NR                           |
| Simpson, 2015       | Healthy adults                     | Question 8 of the Paffenbarger Physical Activity Questionnaire | Sitting                                                                          | NR      | NR                                                   | Actical                  | ST               | NR      | NR                                                                                          | 0.20 (95% CI: 0.14, 0.33)                                                                                  | NR                           |
| Stolberg, 2018      | Patients undergoing gastric bypass | Recent Physical Activity Questionnaire                         | SBs                                                                              | min/day | 342.9 (181.1)                                        | ActiGraph GT3X           | ST               | min/day | 603.5 (68.8)                                                                                | NR                                                                                                         | NR                           |
| Sudholz, 2018       | Workers                            | None                                                           | Sitting at work                                                                  | min/day | Median (IQR) = 420 (360, 450)                        | activPAL, ActiGraph GT3X | Sitting time, ST | min/day | median (IQR):<br>ActivPAL = 346.81 (281.46, 414.31),<br>ActiGraph = 430.94 (395.11, 451.38) | activPAL = 0.24 (95% CI: -1.0, 0.47),<br>ActiGraph = 0.39 (0.15, 0.68)                                     | NR                           |
| Sushames, 2015      | Indigenous Australians             | Past Day Adults' ST Questionnaire                              | SBs                                                                              | min/day | Indigenous = 526 (23.9), non-Indigenous = 575 (82.6) | ActiGraph GT3X           | ST               | min/day | Indigenous = 350 ± 51.4, non-Indigenous = 390 ± 45.3                                        | p<.001                                                                                                     | NR                           |
| Sweatt, 2015        | Latina Immigrants                  | GPAQ                                                           | Sitting                                                                          | min/day | 186.14 (105.04)                                      | ActiGraph MTI            | ST               | min/day | 575.46 (93.67)                                                                              | r = 0.06, p = 0.68                                                                                         | NR                           |
| Terada 2015         | General population                 | Activity Log Diary                                             | SBs                                                                              | min/day | 512.1 (95.2)                                         | SenseWear Pro 3          | ST               | min/day | 475.2 (82.4)                                                                                | r = 0.68, p<.01                                                                                            | 36.9 (LoA: -103.3, 177.1)    |
| Toledo, 2017        | US veterans & university employees | BeWell24 App                                                   | SBs                                                                              | min/day | NR                                                   | activPAL3                | Sitting/lying    | min/day | 695.5 (139.3)                                                                               | ICC = 0.35 (95% CI: 0.04, 0.56)                                                                            | -160.4 (LoA: -179.8, -141.0) |
| Umstatt Meyer, 2013 | Free living adults                 | IPAQ                                                           | Sitting                                                                          | min/day | 502.1 (95% CI: 468.7, 535.4)                         | ActiGraph GT1M           | ST               | min/day | NHANES data reduction = 667.4 (650.0, 685.0), Crouter2 = 525.8 (507.0,                      | NR                                                                                                         | NR                           |

| First author, year    | Population               | Self-report measure                                  |                                                                                                                                                                 |               |                                                                                                     | Device measure |                |            |                                                                                                     | Correlation                                                                                                                        | MD:<br>Self-report – device*                                                                                     |
|-----------------------|--------------------------|------------------------------------------------------|-----------------------------------------------------------------------------------------------------------------------------------------------------------------|---------------|-----------------------------------------------------------------------------------------------------|----------------|----------------|------------|-----------------------------------------------------------------------------------------------------|------------------------------------------------------------------------------------------------------------------------------------|------------------------------------------------------------------------------------------------------------------|
|                       |                          | Name                                                 | Domain or type                                                                                                                                                  | Units         | Mean (SD)*                                                                                          | Name           | Domain or type | Units      | Mean (SD)*                                                                                          |                                                                                                                                    |                                                                                                                  |
|                       |                          |                                                      |                                                                                                                                                                 |               |                                                                                                     |                |                |            | 544.6), Rev Crouter2 = 640.5 (622.9, 658.1)                                                         |                                                                                                                                    |                                                                                                                  |
| Unick, 2017           | Young adults             | SBQ                                                  | SBs                                                                                                                                                             | h/day         | 10.1 (3.5)                                                                                          | SenseWear      | ST             | h/day      | 9.1 (1.8)                                                                                           | $r = 0.27, p < 0.001$                                                                                                              | -0.9 (SD=3.5)                                                                                                    |
| Urda, 2017            | Office workers           | Paffenbarger Physical Activity Questionnaire (PPAQ)  | Total ST (sitting/lying /sleeping)                                                                                                                              | h/24-h        | 14.65 (2.77)                                                                                        | activPAL3      | Sitting/lying  | hours/24-h | 17.71 (1.46) h/24h, 5.69 (1.06) h/8.5-h working day                                                 | $r = 0.253; p = 0.098$                                                                                                             | NR                                                                                                               |
|                       |                          | OSPAQ                                                | Occup. sitting                                                                                                                                                  | h/8.5 workday | 5.96 (1.11)                                                                                         |                |                |            |                                                                                                     | $r = 0.100; p = 0.518$                                                                                                             |                                                                                                                  |
| Van Cauwenbergh, 2014 | Free-living older adults | NR                                                   | SBs (TV, computer, reading, sedentary hobbies, seated conversation or listening to music, telephone, travel, sitting for household chores, resting, and eating) | min/day       | Median (IQR) = 475.0 (383.0, 599.0)                                                                 | ActiGraph GT3X | ST             | min/day    | 580.4 (97.7)                                                                                        | $r = 0.30$ , men: $r = 0.35$ , women: $r = 0.24$                                                                                   | All = -81.88 (95% LoA: -364.16; 200.41), men = -103.55 (-375.36; 168.26), women: = -66.59 (LoA: -352.67; 219.49) |
| Van Der Ploeg, 2010   | Workers                  | 2006 Australian Bureau of Statistics time use survey | SBs                                                                                                                                                             | min/day       | Household = 144 (91), leisure = 213 (172), transportation = 164 (138), total non-occup. = 523 (246) | ActiGraph GT1M | ST             | min/day    | Household = 210 (104), leisure = 164 (133), transportation = 120 (94), total non-occup. = 495 (194) | Household = 0.39 ( $p < .05$ ), leisure = 0.56 ( $p < .05$ ), transportation = 0.50 ( $p < .05$ ), non-occup. = 0.57 ( $p < .05$ ) | NR                                                                                                               |
| Van Dyck, 2015        | General population       | IPAQ-LF                                              | Sitting                                                                                                                                                         | min/day       | 413.1 (157.6)                                                                                       | ActiGraph 7164 | ST             | min/day    | 506.8 (114.1)                                                                                       | $r = 0.67, p < .001$                                                                                                               | 93.7 (LoA: -197.9, 385.2)                                                                                        |
| Van Dyck, 2010        | General population       | IPAQ-LF                                              | Sitting                                                                                                                                                         | min/day       | 421.6 (158.2)                                                                                       | ActiGraph 7164 | ST             | min/day    | 504.8 (117.5)                                                                                       | NR                                                                                                                                 | NR                                                                                                               |

| First author, year | Population                            | Self-report measure                                                           |                                                                                                                                     |              |                                                                  | Device measure                   |                                       |         |                                                                      | Correlation                                                      | MD:<br>Self-report – device* |
|--------------------|---------------------------------------|-------------------------------------------------------------------------------|-------------------------------------------------------------------------------------------------------------------------------------|--------------|------------------------------------------------------------------|----------------------------------|---------------------------------------|---------|----------------------------------------------------------------------|------------------------------------------------------------------|------------------------------|
|                    |                                       | Name                                                                          | Domain or type                                                                                                                      | Units        | Mean (SD)*                                                       | Name                             | Domain or type                        | Units   | Mean (SD)*                                                           |                                                                  |                              |
| van Nassau, 2015   | Health agency employees               | OSPAQ                                                                         | Occup. sitting                                                                                                                      | min/work day | 391 (88)                                                         | activPAL3, ActiGraph GT1M & GT3X | ActivPAL: sitting time, ActiGraph: ST | min/day | ActivPAL = 347 (58), ActiGraph = 348 (54)                            | r = 0.37, p<0.05,                                                | Exact numbers not reported.  |
|                    |                                       | WSQ                                                                           | Workplace sitting                                                                                                                   |              | 405 (72)                                                         |                                  |                                       |         |                                                                      | r = 0.25, NS                                                     |                              |
| Vandezande, 2014   | Overweight and obese adults           | SBQ                                                                           | SBs (sum of questions)                                                                                                              | h/day        | 10.96 (5.16)                                                     | ActiGraph                        | ST                                    | h/day   | 8.65 (1.69)                                                          | NR                                                               | NR                           |
| Vandoni, 2017      | Highschool students (median age = 18) | IPAQ-LF                                                                       | Sitting                                                                                                                             | min/day      | Median (IQR) = 480.0 (420.0, 540.0)                              | ActiHeart                        | ST                                    | min/day | Median (IQR) = 660.50 (542.50, 763.40)                               | r = -0.0199, p = 0.917                                           | 209.2 (LoA: -284.79, 676.0)  |
| Vanroy, 2014       | Stroke patients                       | Activity Diary                                                                | SBs (≤ 1 MET)                                                                                                                       | min/day      | Median (IQR): 342.0 (247.5, 378.0)                               | SenseWear Pro2                   | ST                                    | min/day | Median (IQR): 293.52 (209.24, 437.95)                                | r = 0.16, p = 0.567                                              | NR                           |
| Veitch, 2018       | Orthopedic trauma patients            | IPAQ                                                                          | Sitting                                                                                                                             | h/day        | Median = 8.0                                                     | activPAL                         | Sitting                               | h/day   | Median = 10.59                                                       | r = 0.384, p < 0.001                                             | NR                           |
|                    |                                       | Australian Diabetes, Obesity and Lifestyle General Questionnaire 3 (AusDiab3) | SB                                                                                                                                  |              | Median = 9.21                                                    |                                  |                                       |         |                                                                      | r = 0.551, p < 0.001                                             |                              |
| Visser, 2013       | older adults                          | LASA SB Questionnaire                                                         | Sum of SBs (napping, reading, listening to music, watching TV, computer, working, hobbies, talking, transportation, church/theater) | h/day        | Average = 10.4 (3.5), weekday = 10.2 (3.8), weekend = 10.8 (3.5) | ActiGraph GT3X                   | ST                                    | h/day   | Average = 10.2 (1.2), weekday = 10.1 (1.2), weekend day = 10.3 (1.4) | r = 0.36, p<.01                                                  | 2.1 (LoA: -7.40, 3.25)       |
| Wanner, 2017       | General population                    | GPAQ                                                                          | Sitting                                                                                                                             | h/week       | Total = 51.5 (24.5), men = 54.5 (25.1), women = 48.5 (23.6)      | ActiGraph GT3X                   | ST                                    | h/week  | Total = 61.8 (8.4), men = 63.7 (8.4), women = 59.8 (8.0)             | r = 0.47, p<.001, men: r = 0.44, p<.001, women: r = 0.49, p<.001 | 10.3 (LoA: -32.7, 53.2)      |

| First author, year | Population              | Self-report measure                           |                                                                                    |         |                                                                                                                                                        | Device measure |                |         |                                                                       | Correlation                                                          | MD:<br>Self-report – device*                                                                                                                                                                                                                                            |
|--------------------|-------------------------|-----------------------------------------------|------------------------------------------------------------------------------------|---------|--------------------------------------------------------------------------------------------------------------------------------------------------------|----------------|----------------|---------|-----------------------------------------------------------------------|----------------------------------------------------------------------|-------------------------------------------------------------------------------------------------------------------------------------------------------------------------------------------------------------------------------------------------------------------------|
|                    |                         | Name                                          | Domain or type                                                                     | Units   | Mean (SD)*                                                                                                                                             | Name           | Domain or type | Units   | Mean (SD)*                                                            |                                                                      |                                                                                                                                                                                                                                                                         |
| Wanner, 2016       | General population      | IPAQ-LF                                       | Sitting + motorized transport                                                      | h/week  | Sitting only = 37.0 (19.8), men = 37.7 (20.6), women = 36.5 (19.1); sitting + motorised transport: 43.2 (20.5), men = 44.1 (21.8), women = 42.5 (19.4) | ActiGraph GT3X | ST             | h/week  | Total = 69.3 (11.0), men = 71.4 (11.0), women = 67.6 (10.7)           | All r = 0.42, p<.001, men: r = 0.28, p<.001, women: r = 0.53, p<.001 | 26.4 (LoA: -12.0, 64.9)                                                                                                                                                                                                                                                 |
| Waters, 2016       | Office workers          | SB in Business School Employees Questionnaire | Sum of SBs (work, transport, leisure including TV, napping, eating, online, other) | min/day | Median (IQR): workdays = 870.0 (338.8), non-workdays = 650.0 (365.0)                                                                                   | ActiGraph GT3X | ST             | min/day | Median (IQR): workdays = 667.0 (174.5), non-work days = 557.0 (158.0) | NR                                                                   | NR                                                                                                                                                                                                                                                                      |
| Watson, 2017       | Pregnant women          | GPAQ                                          | Sitting                                                                            | min/day | Median (IQR): 300 (120, 480)                                                                                                                           | ActiGraph GT3X | ST             | min/day | Median (IQR): 457 (380.4, 546.5)                                      | NR                                                                   | 127.5 (95%CI: -299.2, 554.2) at 14–18 weeks gestation and 89.2 (95%CI:-390.7, 569.2) at 29–33 weeks gestation, indicating that the GPAQ underestimates the amount of SB by an average of 127.5 min/day in the second trimester and 89.2 min/day in the third trimester. |
| Welch, 2018        | Breast cancer survivors | IPAQ-LF                                       | Sitting                                                                            | min/day | 303.8 (163.4)                                                                                                                                          | ActiGraph GT1M | ST             | min/day | 603.9 (78.0)                                                          | r = 0.26, P < .001                                                   | 300.1 (95% CI: 283.6, 317.0, p<.001)                                                                                                                                                                                                                                    |
|                    |                         | Sitting Time Questionnaire                    | Sum of SBs                                                                         |         | 605.2 (296.2)                                                                                                                                          |                |                |         |                                                                       | r = 0.30, P < .001                                                   |                                                                                                                                                                                                                                                                         |
| Whitfield, 2013    | Recreational runners    | Multicontext Sitting Time Questionnaire       | Weekend & week day sitting across contexts                                         | min/day | Workday = 659.2 (221.2), non-workday = 568.2 (228.9)                                                                                                   | ActiGraph GT1M | ST             | min/day | Workday = 550.9 (89.1), non-workday = 478.6 (80.1)                    | Workday r = 0.16, p = 0.48, non-workday r = 0.44, p = 0.09           | NR                                                                                                                                                                                                                                                                      |

| First author, year | Population                    | Self-report measure              |                                                                                |              |                                                                                                | Device measure                           |                   |              |                                                                                                                     | Correlation                                                                                               | MD:<br>Self-report – device*                                                                                             |
|--------------------|-------------------------------|----------------------------------|--------------------------------------------------------------------------------|--------------|------------------------------------------------------------------------------------------------|------------------------------------------|-------------------|--------------|---------------------------------------------------------------------------------------------------------------------|-----------------------------------------------------------------------------------------------------------|--------------------------------------------------------------------------------------------------------------------------|
|                    |                               | Name                             | Domain or type                                                                 | Units        | Mean (SD)*                                                                                     | Name                                     | Domain or type    | Units        | Mean (SD)*                                                                                                          |                                                                                                           |                                                                                                                          |
| Wick, 2016         | Office workers                | OSPAQ                            | Occup. sitting                                                                 | % of workday | 73.2 (18.9)                                                                                    | ActiGraph GT3X                           | ST                | % of workday | 77.1 (11.1)                                                                                                         | ICC = 0.51 (95% CI: 0.24; 0.71)                                                                           | -3.9 (SD = 15.1)                                                                                                         |
| Wijndaele, 2014    | General population            | SIT-Q-7d                         | Total sitting (meals, transport, occup., non-occup. screen time, and other ST) | h/day        | Sample 1 = 10.93 (4.35), sample 2: total = 9.20 (4.37), men = 9.94 (4.43), women = 8.98 (4.29) | Sample 1: activPAL3, sample 2: Actiheart | 1) Sitting, 2) ST | h/day        | Sample 1 = 9.35 (2.69), sample 2 (used accel method): total = 10.04 (2.29), men = 10.54 (1.97), women = 9.62 (1.76) | Sample 1: r = 0.52, p<.01, sample 2: total r = 0.37, p<.001, men r = 0.32, p<.001, women r = 0.35, p<.001 | Sample 1 = 0.98 (4.25), Sample 2: total = -0.73 (3.71), p<.001, men = -0.59 (3.66), p<.001, women = -0.84 (3.77), p<.001 |
| Yi, 2014           | General population            | Physical Activity Transit Survey | Daytime and evening sitting                                                    | min/day      | 444                                                                                            | NR                                       | ST                | min/day      | 494                                                                                                                 | r = 0.32, p<0.01                                                                                          | 49 (LoA: -441, 343)                                                                                                      |
| Yu, 2014           | Rheumatoid arthritis patients | IPAQ                             | Sitting                                                                        | min/day      | 343 (141)                                                                                      | NR                                       | ST                | min/day      | 583 (98)                                                                                                            | r = 0.29, p<0.05                                                                                          | NR                                                                                                                       |

Accel – accelerometer, CI – confidence interval, GPAQ – Global Physical Activity Questionnaire, IPAQ-LF – International Physical Activity Questionnaire Long Form, IPAQ – SF – International Physical Activity Questionnaire Short Form, LoA –limits of agreement, MD – mean difference, NR –not reported, occup. – occupational, OSPAQ – Occupational Sitting Physical Activity Questionnaire, SBQ – Sedentary Behaviour Questionnaire, SD –standard deviation, SIT-Q-7d – Last 7-day sedentary behavior questionnaire, ST – sedentary time, WSQ – Workforce Sitting Questionnaire

\*Mean (SD) unless otherwise noted.
