# Supplementary material for: A comparison of self-reported and device measured sedentary behaviour in adults: a systematic review and meta-analysis
Source: PubMed Central journal article supplement (PMC7055033; doi:10.1186/s12966-020-00938-3), 2020-03-04
Supplement: 12966_2020_938_MOESM17_ESM.pdf [file 12966_2020_938_MOESM17_ESM.pdf]

Supplemental table 4. Reliability characteristics

| First author, year   | Population                                          | Self-report measure                              |                                                                                                                          | Reliability assessment |                |                                                                                                                                                                                                                                                                                                                                                                                                                                                                                                                                                                                                                                                                                                                                                                                                                                                                                                                                                                                                                                                                                                                                                                                                                                                                                |
|----------------------|-----------------------------------------------------|--------------------------------------------------|--------------------------------------------------------------------------------------------------------------------------|------------------------|----------------|--------------------------------------------------------------------------------------------------------------------------------------------------------------------------------------------------------------------------------------------------------------------------------------------------------------------------------------------------------------------------------------------------------------------------------------------------------------------------------------------------------------------------------------------------------------------------------------------------------------------------------------------------------------------------------------------------------------------------------------------------------------------------------------------------------------------------------------------------------------------------------------------------------------------------------------------------------------------------------------------------------------------------------------------------------------------------------------------------------------------------------------------------------------------------------------------------------------------------------------------------------------------------------|
|                      |                                                     | Name                                             | Domain or type                                                                                                           | Time between recall    | Statistic used | Results                                                                                                                                                                                                                                                                                                                                                                                                                                                                                                                                                                                                                                                                                                                                                                                                                                                                                                                                                                                                                                                                                                                                                                                                                                                                        |
| Aguilar-Farias, 2015 | Community-dwelling older adults                     | SB Question                                      | Sitting                                                                                                                  | Unclear                | ICC            | Average = 0.79 (SEM 1.03), weekday = 0.80 (SEM 1.04), weekend day = 0.78 (SEM 1.10)                                                                                                                                                                                                                                                                                                                                                                                                                                                                                                                                                                                                                                                                                                                                                                                                                                                                                                                                                                                                                                                                                                                                                                                            |
|                      |                                                     | MARCA                                            | ST                                                                                                                       |                        |                | Day before yesterday = 0.72 (SEM 1.18), yesterday = 0.96 (SEM 0.47)                                                                                                                                                                                                                                                                                                                                                                                                                                                                                                                                                                                                                                                                                                                                                                                                                                                                                                                                                                                                                                                                                                                                                                                                            |
| Alkahtani, 2016      | Male university students                            | GPAQ                                             | Sitting                                                                                                                  | NR                     | Spearman       | 0.70, p <0.01                                                                                                                                                                                                                                                                                                                                                                                                                                                                                                                                                                                                                                                                                                                                                                                                                                                                                                                                                                                                                                                                                                                                                                                                                                                                  |
| Anjana, 2015         | Urban and rural populations                         | MPAQ                                             | TV, sitting                                                                                                              | 1 month                | ICC            | Sitting = 0.81, TV viewing = 0.67                                                                                                                                                                                                                                                                                                                                                                                                                                                                                                                                                                                                                                                                                                                                                                                                                                                                                                                                                                                                                                                                                                                                                                                                                                              |
| Bonn, 2015           | Men who underwent Prostate Specific Antigen testing | Active-Q                                         | SBs                                                                                                                      | 3 weeks                | ICC            | 0.80 (95% CI: 0.74, 0.86)                                                                                                                                                                                                                                                                                                                                                                                                                                                                                                                                                                                                                                                                                                                                                                                                                                                                                                                                                                                                                                                                                                                                                                                                                                                      |
| Busschaert, 2015     | General population                                  | last-7-day SB questionnaire (SIT-Q-7d)           | Sitting/lying down                                                                                                       | >6 days                | ICC            | Adults = 0.22, older adults = -0.13                                                                                                                                                                                                                                                                                                                                                                                                                                                                                                                                                                                                                                                                                                                                                                                                                                                                                                                                                                                                                                                                                                                                                                                                                                            |
| Cerin, 2012          | Urban older adults                                  | IPAQ - LF                                        | Sitting                                                                                                                  | 2 weeks                | ICC            | 0.77 (95% CI: 0.66, 0.83)                                                                                                                                                                                                                                                                                                                                                                                                                                                                                                                                                                                                                                                                                                                                                                                                                                                                                                                                                                                                                                                                                                                                                                                                                                                      |
| Chasan-Taber, 2004   | Pregnant women                                      | Pregnancy Physical Activity Questionnaire (PPAQ) | SBs (household/care giving, occupational, sports/ exercise, transportation, and inactivity)                              | one week               | ICC            | 0.79                                                                                                                                                                                                                                                                                                                                                                                                                                                                                                                                                                                                                                                                                                                                                                                                                                                                                                                                                                                                                                                                                                                                                                                                                                                                           |
| Chau, 2012           | Workers                                             | OSPAQ                                            | Occupational sitting                                                                                                     | 1 week                 | ICC            | 0.89 (95% CI: 0.83, 0.92)                                                                                                                                                                                                                                                                                                                                                                                                                                                                                                                                                                                                                                                                                                                                                                                                                                                                                                                                                                                                                                                                                                                                                                                                                                                      |
| Chau, 2011           | Workers                                             | WSQ, IPAQ                                        | WSQ: Occupational sitting, TV, computer at home, leisure activities, travel on workdays and non-workdays. IPAQ = sitting | 7 days                 | ICC            | <b>WSQ: ALL WORKDAY:</b> Transport ICC = 0.67 (95% CI: 0.54, 0.77); at work ICC = 0.63 (95% CI: 0.49, 0.74); watching TV ICC = 0.91 (95% CI: 0.87, 0.94); computer at home ICC = 0.56 (95% CI: 0.40, 0.69); other leisure activities ICC = 0.68 (95% CI: 0.55, 0.78); total all domains ICC = 0.65 (95% CI: 0.51, 0.75). <b>WSQ: ALL NON- WORKDAY:</b> Transport ICC = 0.60 (95% CI: 0.45, 0.72); at work ICC = 0.50 (95% CI: 0.33, 0.64); watching TV ICC = 0.79 (95% CI: 0.69, 0.85); computer at home ICC = 0.81 (95% CI: 0.73, 0.87); other leisure activities ICC = 0.59 (95% CI: 0.44, 0.71); total all domains ICC = 0.80 (95% CI: 0.72, 0.87). <b>WSQ: ALL AVERAGE TOTAL WORK+NONWORK DAYS</b> ICC = 0.76 (95% CI: 0.66, 0.83). <b>WSQ: WOMEN: WORKDAY:</b> Transport ICC = 0.69 (95% CI: 0.53, 0.81); at work ICC = 0.79 (95% CI: 0.66, 0.87); watching TV ICC = 0.95 (95% CI: 0.91, 0.97); computer at home ICC = 0.59 (95% CI: 0.39, 0.74); other leisure activities ICC = 0.74 (95% CI: 0.59, 0.84); total all domains ICC = 0.77 (95% CI: 0.65, 0.86). <b>WSQ: WOMEN NON-WORKDAY:</b> Transport ICC = 0.63 (95% CI: 0.45, 0.77); at work ICC = 0.57 (95% CI: 0.37, 0.72); watching TV ICC = 0.76 (95% CI: 0.62, 0.85); computer at home ICC = 0.79 (95% CI: 0.66, |

| First author, year | Population              | Self-report measure                                       |                                                                                                                                                                                                              | Reliability assessment |                                                   |                                                                                                                                                                                                                                                                                                                                                                                                                                                                                                                                                                                                                                                                                                                                                                                                                                                                                                                                                                                                                                                                                                                                                                                                                                                                                                                                                |
|--------------------|-------------------------|-----------------------------------------------------------|--------------------------------------------------------------------------------------------------------------------------------------------------------------------------------------------------------------|------------------------|---------------------------------------------------|------------------------------------------------------------------------------------------------------------------------------------------------------------------------------------------------------------------------------------------------------------------------------------------------------------------------------------------------------------------------------------------------------------------------------------------------------------------------------------------------------------------------------------------------------------------------------------------------------------------------------------------------------------------------------------------------------------------------------------------------------------------------------------------------------------------------------------------------------------------------------------------------------------------------------------------------------------------------------------------------------------------------------------------------------------------------------------------------------------------------------------------------------------------------------------------------------------------------------------------------------------------------------------------------------------------------------------------------|
|                    |                         | Name                                                      | Domain or type                                                                                                                                                                                               | Time between recall    | Statistic used                                    | Results                                                                                                                                                                                                                                                                                                                                                                                                                                                                                                                                                                                                                                                                                                                                                                                                                                                                                                                                                                                                                                                                                                                                                                                                                                                                                                                                        |
|                    |                         |                                                           |                                                                                                                                                                                                              |                        |                                                   | 0.87); other leisure activities ICC = 0.76 (95% CI: 0.62, 0.85); total all domains ICC = 0.85 (95% CI: 0.76, 0.91). <b>WSQ: WOMEN AVERAGE TOTAL</b> ICC = 0.90 (95% CI: 0.84, 0.94). <b>WSQ: MEN: WORKDAY:</b> Transport ICC = 0.56 (95% CI: 0.27, 0.75); at work ICC = 0.51 (95% CI: 0.21, 0.72); watching TV ICC = 0.86 (95% CI: 0.70, 0.93); computer at home ICC = 0.53 (95% CI: 0.24, 0.73); other leisure activities ICC = 0.51 (95% CI: 0.21, 0.72); total all domains ICC = 0.46 (95% CI: 0.16, 0.69). <b>WSQ: MEN NON-WORKDAY:</b> Transport ICC = 0.56 (95% CI: 0.28, 0.75); at work ICC = 0.29 (95% CI: -0.04, 0.56); watching TV ICC = 0.81 (95% CI: 0.64, 0.91); computer at home ICC = 0.83 (95% CI: 0.69, 0.91); other leisure activities ICC = 0.23 (95% CI: -0.12, 0.53); total all domains ICC = 0.57 (95% CI: 0.30, 0.76). <b>WSQ: MEN AVERAGE TOTAL</b> ICC = 0.57 (95% CI: 0.30, 0.76). <b>IPAQ TOTAL SITTING:</b> Weekday ICC = 0.69 (95% CI: 0.56, 0.78); weekend ICC = 0.65 (0.51, 0.76); average total ICC = 0.73 (0.61, 0.81). <b>IPAQ WOMEN SITTING:</b> Weekday ICC = 0.72 (95% CI: 0.57, 0.83); weekend ICC = 0.72 (0.56, 0.82); average total ICC = 0.77 (0.62, 0.86). <b>IPAQ MEN SITTING:</b> Weekday ICC = 0.63 (95% CI: 0.36, 0.80); weekend ICC = 0.47 (0.15, 0.70); average total ICC = 0.67 (0.42, 0.83). |
| Chinapaw, 2009     | Workers                 | Activity Questionnaire for Adults and Adolescents (AQuAA) | SBs                                                                                                                                                                                                          | 2 weeks                | ICC                                               | 0.60 (95% CI: 0.40, 0.74)                                                                                                                                                                                                                                                                                                                                                                                                                                                                                                                                                                                                                                                                                                                                                                                                                                                                                                                                                                                                                                                                                                                                                                                                                                                                                                                      |
| Chu, 2018          | University desk workers | ASBQ, GPAQ                                                | ASBQ: occupational; transportation; leisure-time; other. GPAQ: sitting                                                                                                                                       | 7 days                 | Spearman r; ICC                                   | GPAQ $r = 0.71$ (95% CI: 0.62, 0.82), ICC = 0.73 (95% CI: 0.61, 0.82). ASBQ sum $r = 0.61$ (95% CI: 0.46, 0.73), ICC = 0.72 (95% CI: 0.57, 0.82), ASBQ occup $r = 0.82$ (95% CI: 0.74, 0.88), ICC = 0.78 (95% CI: 0.66, 0.86); ASBQ transport $r = 0.71$ (95% CI: 0.58, 0.80), ICC = 0.68 (95% CI: 0.51, 0.79); ASBQ eating $r = 0.59$ (95% CI: 0.43, 0.71), ICC = 0.73 (95% CI: 0.58, 0.82); ASBQ TV $r = 0.78$ (95% CI: 0.68, 0.85), ICC = 0.82 (95% CI: 0.73, 0.88); ASBQ leisure computer $r = 0.67$ (95% CI: 0.53, 0.77), ICC = 0.59 (95% CI: 0.43, 0.71); ASBQ other leisure $r = 0.41$ (95% CI: 0.23, 0.58), ICC = 0.38 (95% CI: 0.18, 0.55)                                                                                                                                                                                                                                                                                                                                                                                                                                                                                                                                                                                                                                                                                            |
| Clark, 2013        | Breast cancer survivors | Past-day Adults' Sedentary Time (PAST)                    | Single weekday: time spent sitting or lying while at work, travelling, watching TV, computer (excluding work), reading (excluding work), hobbies, and any other purposes not reported in the previous items. | 7 days                 | Composite score: ICC; individual domains spearman | Composite sum ICC = 0.50 (95% CI: 0.32, 0.64); work $r = 0.64$ (95% CI: 0.49, 0.75), transport $r = 0.44$ (0.25, 0.60), TV $r = 0.38$ (0.18, 0.55); computer $r = 0.40$ (95% CI: 0.21, 0.57); reading $r = 0.37$ (95% CI: 0.17, 0.54); hobbies $r = 0.36$ (95% CI: 0.16, 0.53), other sedentary $r = 0.22$ (95% CI: 0.01, 0.42)                                                                                                                                                                                                                                                                                                                                                                                                                                                                                                                                                                                                                                                                                                                                                                                                                                                                                                                                                                                                                |
| Craig, 2003        | General population      | IPAQ – SF, IPAQ-LF                                        | Sitting                                                                                                                                                                                                      | 7 days                 | Spearman                                          | IPAQ-LF: 0.28 to 0.93, IPAQ-SF: 0.18 to 0.95                                                                                                                                                                                                                                                                                                                                                                                                                                                                                                                                                                                                                                                                                                                                                                                                                                                                                                                                                                                                                                                                                                                                                                                                                                                                                                   |

| First author, year | Population                     | Self-report measure                                                 |                                                                                                                                                                                                              | Reliability assessment                    |                                    |                                                                                                                                  |
|--------------------|--------------------------------|---------------------------------------------------------------------|--------------------------------------------------------------------------------------------------------------------------------------------------------------------------------------------------------------|-------------------------------------------|------------------------------------|----------------------------------------------------------------------------------------------------------------------------------|
|                    |                                | Name                                                                | Domain or type                                                                                                                                                                                               | Time between recall                       | Statistic used                     | Results                                                                                                                          |
| Doyle, 2018        | Emirati university students    | GPAQ (Arabic version)                                               | Sitting                                                                                                                                                                                                      | 7 days                                    | Spearman                           | 0.44 (95% CI: 0.22, 0.64)                                                                                                        |
| Duncan, 2019       | Individuals with schizophrenia | IPAQ-SF                                                             | Sitting                                                                                                                                                                                                      | 4 weeks                                   | ICC, spearman                      | Mean difference: 26.6 min, (95% LoA: -510.9, 564.2) and ICC = 0.41 (95% CI: 0.21, 0.59); spearman: $\rho = 0.49$ , $p < 0.001$   |
| Fjeldsoe, 2009     | Women with young children      | Australian Women's Activity Survey (AWAS)                           | Sitting (across multiple domains)                                                                                                                                                                            | 7 days                                    | ICC                                | ICC = 0.42 (95% CI: 0.13, 0.64)                                                                                                  |
| Fowles, 2017       | University population          | CSEP PASB-Q                                                         | Occupational, leisure & total sitting                                                                                                                                                                        | 7 days                                    | correlation                        | work sitting $r = 0.45$ , $p < 0.001$ ; leisure sitting $r = 0.66$ , $p < 0.001$ ; total sedentary time $r = 0.85$ , $p < 0.001$ |
| Gardiner, 2011     | Older adults                   | Modified Salmon questionnaire                                       | Watching TV, computer use, reading, socialising, transport and hobbies, and a summary measure (total sedentary time)                                                                                         | 7 days                                    | Spearman                           | Total sedentary time had acceptable test-retest reliability $\rho = 0.52$ (95% CI: 0.27 to 0.70)                                 |
| Gennuso, 2015      | Older adults                   | 1) Yale Physical Activity Survey for Older Adults (YPAS), 2) CHAMPS | CHAMPS: SBs; YPAS: SBs                                                                                                                                                                                       | 10 days                                   | ICC                                | YPAS = 0.59 ( $P < .001$ ), CHAMPS = 0.64 ( $P < .001$ )                                                                         |
| Gennuso, 2016      | Older adults                   | modified Salmon questionnaire (Gardiner)                            | (1) Watching TV, (2) using the computer, (3) reading, (4) socializing, (5) driving or in public transportation, (6) doing hobbies, and (7) any other activities.                                             | 1 week                                    | ICC, Lin's concordance correlation | 0.48, $P < 0.001$                                                                                                                |
| Hansen, 2014       | General population             | IPAQ-LF                                                             | Sitting (weekday + weekend)                                                                                                                                                                                  | 2-3 WEEKS                                 | ICC                                | 0.66                                                                                                                             |
| Hekler, 2012       | Older adults (65+)             | CHAMPS                                                              | Sedentary time (TV, reading, socialize, passive transit, attend events)                                                                                                                                      | 6 months                                  | ICC                                | 0.56                                                                                                                             |
| Herrmann, 2013     | General population             | GPAQ, IPAQ                                                          | Sitting                                                                                                                                                                                                      | GPAQ: Study 1: 10 days, study 2: 3 months | ICC                                | Study 1: ICC = 0.92 (95% CI: 0.78, 0.97), study 2: ICC = 0.83 (95% CI: 0.70, 0.90)                                               |
| Ishii, 2018        | Japanese adults                | NR                                                                  | Works and non-workdays sedentary time in: 1) car transport; 2) public transport; 3) at work; 4) watching TV, videos and DVDs; 5) using a computer, cell phone or tablet outside of work; 6) in leisure time. | 2 weeks                                   | ICC                                | workdays ICC = 0.77, $p < .01$ , non-work days ICC = 0.53, $p < .01$ , total ICC = 0.74, $p < 0.01$                              |
| Jancey, 2014       | Office workers                 | OSPAQ                                                               | Occupational sitting                                                                                                                                                                                         | 7 days                                    | ICC, t-test                        | 0.66 (95% CI: 0.49, 0.77)                                                                                                        |

| First author, year    | Population                                       | Self-report measure                                          |                                                                              | Reliability assessment |                     |                                                                                                                                                                                                                                                                                                                                                |
|-----------------------|--------------------------------------------------|--------------------------------------------------------------|------------------------------------------------------------------------------|------------------------|---------------------|------------------------------------------------------------------------------------------------------------------------------------------------------------------------------------------------------------------------------------------------------------------------------------------------------------------------------------------------|
|                       |                                                  | Name                                                         | Domain or type                                                               | Time between recall    | Statistic used      | Results                                                                                                                                                                                                                                                                                                                                        |
| Kohler, 2017          | Healthy, community dwelling adults               | cpar24                                                       | SBs                                                                          | 3 hours                | Spearman            | 0.75                                                                                                                                                                                                                                                                                                                                           |
| Larsson, 2019         | Validity = office workers, reliability = seniors | SED-GIH                                                      | Sitting                                                                      | Mean 5.2 days          | ICC, weighted kappa | ICC = 0.86 (95% CI: 0.70, 0.90), kappa = 0.77 (95% CI: 0.68, 0.86)                                                                                                                                                                                                                                                                             |
| Lopez-Rodriguez, 2017 | Healthy elderly                                  | EXERNET Questionnaire                                        | Sitting                                                                      | 14 days                | ICC                 | all = 0.68, men = 0.87, women = 0.65                                                                                                                                                                                                                                                                                                           |
| Mader, 2006           | Middle-aged women & men                          | IPAQ-SF                                                      | Sitting                                                                      | 14-21 days             | Spearman            | Total: 0.60, p<.05                                                                                                                                                                                                                                                                                                                             |
| Maher, 2017           | Community-dwelling older adults                  | Daily diary                                                  | Sitting/lying time                                                           | 1 day                  | ICC                 | 0.56                                                                                                                                                                                                                                                                                                                                           |
| Marshall, 2010        | Middle-aged women & men                          | Marshall Sitting Questionnaire                               | Sitting (travel, work, TV, computer, leisure)                                | median = 11 days       | ICC                 | Women: weekday work = 0.79 (95% CI: 0.73, 0.84); computer = 0.63 (95% CI: 0.52, 0.71); weekend day computer = 0.72 (95% CI: 0.64, 0.79). Men: weekday work = 0.86 (95% CI: 0.79, 0.90); TV = 0.65 (95% CI: 0.52, 0.75); computer = 0.62 (95% CI: 0.48, 0.72); weekend day TV = 0.62 (95% CI: 0.48, 0.73); computer = 0.59 (95% CI: 0.44, 0.71) |
| Matsuo, 2016          | Workers                                          | Workers' Sitting- and Walking-Time Questionnaire (WSWQ)      | Occupational sitting, leisure sitting, non-workday sitting                   | 7 days                 | ICC                 | Work time: time method = 0.85 (95% CI: 0.76, 0.91); % method = 0.83 (95% CI: 0.73, 0.89). Non-work time: time method = 0.49 (95% CI: 0.28, 0.66); % method = 0.71 (95% CI: 0.56, 0.81). Non-work day: time method = 0.64 (95% CI: 0.47, 0.76), % method: 0.78 (95% CI: 0.66, 0.86)                                                             |
| Matton, 2007          | Employed/unemployed adults, retired adults       | Flemish Physical Activity Computerized Questionnaire (FPACQ) | TV                                                                           | 2 weeks                | ICC                 | Employed/unemployed: men: 0.93 (95% CI: 0.86, 0.97), women: 0.92 (95% CI: 0.84, 0.96). Retired: men 0.76 (95% CI: 0.49, 0.89), women 0.89(95% CI: 0.72–0.96)                                                                                                                                                                                   |
| Mensah, 2016          | Healthy general population                       | Sedentary, Transportation and Activity Questionnaire (STAQ)  | Total sitting, occupational sitting, transportation sitting, leisure sitting | 1 months               | ICC                 | total sitting: 0.52 (95% CI: 0.22, 0.73), work: 0.71 (95% CI: 0.49, 0.84], transport: 0.28 (95% CI: -0.06, 0.56), leisure: 0.37 (95% CI: 0.03, 0.62)                                                                                                                                                                                           |
| Murillo-Rabago, 2010  | Healthy adults                                   | IPAQ-SF & IPAQ-LF                                            | Sitting                                                                      | 5 days                 | Spearman            | IPAQ-SF: 0.73 (p<0.001), IPAQ-LF: 0.881 (p<0.001)                                                                                                                                                                                                                                                                                              |
| Pedersen, 2016        | Desk-based workers                               | OSPAQ                                                        | Occupational sitting                                                         | 1 week                 | ICC                 | 0.44 (95% CI: 0.24 – 0.60)                                                                                                                                                                                                                                                                                                                     |
| Pediscic, 2014        | Desk-based workers                               | Workplace Sitting Breaks Questionnaire (SITBRQ)              | Duration and frequency of sitting breaks at work                             | 7-14 days              | Spearman            | Frequency = 0.71 (95% CI: 0.59, 0.79), duration = 0.59 (95% CI: 0.45, 0.71)                                                                                                                                                                                                                                                                    |

| First author, year   | Population                         | Self-report measure                                            |                                                                                                                                                                                                                                                                  | Reliability assessment |                |                                                                                                        |
|----------------------|------------------------------------|----------------------------------------------------------------|------------------------------------------------------------------------------------------------------------------------------------------------------------------------------------------------------------------------------------------------------------------|------------------------|----------------|--------------------------------------------------------------------------------------------------------|
|                      |                                    | Name                                                           | Domain or type                                                                                                                                                                                                                                                   | Time between recall    | Statistic used | Results                                                                                                |
| Peters, 2010         | Urban adults                       | Past Year Physical Activity Questionnaire                      | SBs                                                                                                                                                                                                                                                              | 1 year                 | ICC            | total = 0.56, men = 0.61, women = 0.49                                                                 |
| Rees-Punia, 2019     | General population                 | 7-day diary                                                    | Sitting                                                                                                                                                                                                                                                          | 1 year                 | Spearman       | Diary: 0.67 (95% CI: 0.63, 0.71)                                                                       |
| Riviere, 2018        | General population                 | GPAQ (French version)                                          | Sitting                                                                                                                                                                                                                                                          | 7 days                 | ICC            | 0.80 (95% CI: 0.69, 0.87)                                                                              |
| Roman-Vinas, 2010    | General population                 | IPAQ-LF                                                        | Sitting                                                                                                                                                                                                                                                          | 3 days                 | Spearman       | 0.40, p<.01                                                                                            |
| Rosenberg, 2010      | validity = overweight men & women  | SBQ                                                            | SBs                                                                                                                                                                                                                                                              | 2 weeks                | ICC            | total weekday = 0.848 (95% CI: 0.747, 0.911), total weekend day = 0.770 (95% CI: 0.626, 0.863)         |
| Ryan, 2018           | Community dwelling older adults    | IPAQ-LF                                                        | Sitting                                                                                                                                                                                                                                                          | 8-11 days              | Spearman       | 0.26                                                                                                   |
| Segura-Jimenez, 2013 | Women with fibromyalgia            | IPAQ-LF                                                        | Sitting, Sitting + travel                                                                                                                                                                                                                                        | 9 days                 | ICC            | 0.68 (95% CI: 0.58, 0.76)                                                                              |
| Shuval, 2014         | Primary care patients              | Rapid Assessment Disuse Index (RADI)                           | Sitting (include sitting at home/work, watching TV and video/DVDs, on the computer at home/work, eating meals, etc)                                                                                                                                              | 12-16 days             | ICC            | week = 0.559 (95% CI: 0.442, 0.658), month = 0.576 (0.462, 0.672), year = 0.602 (95% CI: 0.491, 0.693) |
| Simpson, 2015        | Healthy adults                     | Question 8 of the Paffenbarger Physical Activity Questionnaire | Sitting                                                                                                                                                                                                                                                          | 3-6 months             | ICC            | 0.71 (95% CI: 0.61, 0.74)                                                                              |
| Sudholz, 2018        | Workers                            | None                                                           | Sitting at work                                                                                                                                                                                                                                                  | 7 days                 | ICC            | 0.78 (95% CI: 0.65, 0.86)                                                                              |
| Toledo, 2017         | US veterans & university employees | BeWell24 App                                                   | SBs                                                                                                                                                                                                                                                              | 2 weeks                | ICC            | 0.65 (95% CI: 0.43, 0.82)                                                                              |
| Van Cauwenberg, 2014 | Free-living older adults           | NR                                                             | Sedentary time (TV, computer, reading, sedentary hobbies (e.g. handicraft, playing cards), seated conversation or listening to music, telephone, public transport, driving a car, being passenger in a car, sitting during household chores, resting, and eating | 8 days                 | ICC            | 0.77 (95% CI: 0.57, 0.89)                                                                              |
| Van Der Ploeg, 2010  | Workers                            | 2006 Australian Bureau of Statistics time use survey           | SB                                                                                                                                                                                                                                                               | 7 days                 | ICC            | 0.55 (95% CI: 0.42, 0.66)                                                                              |

| First author, year | Population           | Self-report measure                                  |                                                                                                                                                | Reliability assessment   |                |                                                                                                                                |
|--------------------|----------------------|------------------------------------------------------|------------------------------------------------------------------------------------------------------------------------------------------------|--------------------------|----------------|--------------------------------------------------------------------------------------------------------------------------------|
|                    |                      | Name                                                 | Domain or type                                                                                                                                 | Time between recall      | Statistic used | Results                                                                                                                        |
| Visser, 2013       | older adults         | LASA SB Questionnaire                                | Sum of SB (napping, reading, listening to music, watching TV, computer, working, hobby, on the phone, talking, transportation, church/theater) | 23 (8) days              | ICC            | 0.71 (95% CI 0.57, 0.81)                                                                                                       |
| Watson, 2017       | Pregnant women       | GPAQ                                                 | Sitting                                                                                                                                        |                          | ICC            | 0.05 (95% CI: -0.11, 0.22)                                                                                                     |
| Whitfield, 2013    | Recreational runners | Multi-context Sitting Time Questionnaire             | Weekend & week day sitting across contexts                                                                                                     | 1 week                   | ICC            | workday = 0.76 (95% CI: 0.50, 0.89), non-workday = 0.72 (95% CI: 0.42, 0.87)                                                   |
| Wijndaele, 2014    | General population   | Last 7-d sedentary behavior questionnaire (SIT-Q-7d) | Total sitting (meals, transportation, occupation, non-occupational screen time, and other ST)                                                  | 1) 2 weeks, 2) 2-8 weeks | ICC            | Sample 1: ICC = 0.68 (95% CI: 0.50, 0.81), sample 2: ICC = 0.53 (95% CI: 0.44, 0.62) **Note also provides domain specific ICCs |

7-day SLIPA log – Sedentary and Light Intensity Physical Activity Log, CI – confidence interval, GPAQ – Global Physical Activity Questionnaire, ICC – intraclass correlation coefficient, MARCA – Multimedia Activity Recall for Children and Adolescents, MPAQ – Madras Diabetes Research Foundation Physical Activity Questionnaire, NQLS – Neighborhood Quality of Life Study, SB – sedentary behaviour, SEM – standard error of the mean, ST – sedentary time
